# Supplementary material
Source: publisher figshare collection journal article supplement (https://geolsoc.figshare.com/ndownloader/files/13574360)
Supplement: Supplementary file 1 [file 13574360]

## Sheet: SG-04-Untreated
2Theta	Counts (I)
3.23443	3082.32
3.23435	3067.86
3.23426	3053.4
3.247	3038.94
3.24692	3024.48
3.24683	3010.02
3.24675	2995.56
3.24666	2981.1
3.24658	2966.64
3.24649	2952.18
3.24641	2937.72
3.24632	2923.26
3.24626	2912.41
3.28547	3038.94
3.29821	3024.48
3.29812	3010.02
3.29804	2995.56
3.29795	2981.1
3.29787	2966.64
3.29779	2953.99
3.32762	2937.72
3.31046	2926.87
3.35347	2973.87
3.34909	2955.79
3.37959	3053.4
3.37521	3035.32
3.37512	3020.86
3.37504	3006.4
3.37495	2991.94
3.37466	2943.14
3.40049	2973.87
3.40041	2959.41
3.40024	2930.49
3.40015	2916.03
3.40007	2901.57
3.39998	2887.11
3.3999	2872.65
3.39981	2858.19
3.42645	3028.09
3.42637	3013.63
3.42628	2999.17
3.4262	2984.71
3.43024	2944.95
3.45601	2966.64
3.45576	2923.26
3.45138	2905.18
3.4513	2892.53
3.48196	3017.25
3.47758	2999.17
3.47749	2984.71
3.48153	2944.95
3.50343	3035.32
3.5073	2966.64
3.50705	2923.26
3.50267	2905.18
3.50258	2890.72
3.5025	2876.26
3.48963	2869.03
3.51615	3017.25
3.51606	3002.79
3.51598	2988.33
3.52855	2944.95
3.52804	2858.19
3.52795	2843.73
3.52788	2831.08
3.55838	2930.49
3.554	2912.41
3.55392	2897.95
3.55383	2883.49
3.55375	2869.03
3.58441	2995.56
3.58003	2977.48
3.57994	2963.02
3.57986	2948.56
3.60606	3042.55
3.60597	3028.09
3.60589	3013.63
3.60967	2930.49
3.60529	2912.41
3.60521	2897.95
3.60512	2883.49
3.60504	2869.03
3.6186	2995.56
3.61852	2981.1
3.61843	2966.64
3.61835	2952.18
3.63057	2850.96
3.65673	2937.72
3.65664	2923.26
3.65656	2908.8
3.65647	2894.34
3.65639	2879.88
3.6563	2865.42
3.68244	2948.56
3.68614	2850.96
3.68176	2832.88
3.68168	2820.23
3.71225	2930.49
3.70787	2912.41
3.70779	2897.95
3.7077	2883.49
3.70763	2870.84
3.73375	2952.18
3.76359	2937.72
3.7592	2919.64
3.75912	2905.18
3.75903	2890.72
3.75895	2876.26
3.75886	2861.8
3.75878	2847.34
3.78953	2988.33
3.78515	2970.25
3.78506	2955.79
3.78859	2829.27
3.77143	2818.42
3.8106	2937.72
3.81052	2923.26
3.81043	2908.8
3.81035	2894.34
3.81026	2879.88
3.81018	2865.42
3.81009	2850.96
3.8364	2963.02
3.83631	2948.56
3.83993	2836.5
3.83554	2818.42
3.83546	2803.96
3.83537	2789.5
3.83529	2775.04
3.82242	2767.81
3.86612	2930.49
3.86174	2912.41
3.86166	2897.95
3.86157	2883.49
3.86149	2869.03
3.8614	2854.57
3.88694	2836.5
3.91737	2923.26
3.91299	2905.18
3.91291	2890.72
3.91282	2876.26
3.91274	2861.8
3.91265	2847.34
3.91678	2822.04
3.95165	2937.72
3.96439	2923.26
3.9643	2908.8
3.96422	2894.34
3.96413	2879.88
3.96405	2865.42
3.96396	2850.96
3.96388	2836.5
3.96379	2822.04
3.99363	2808.78
4.02008	2944.95
4.0157	2926.87
4.01561	2912.41
4.01553	2897.95
4.01544	2883.49
4.01537	2870.84
4.00247	2858.19
4.00239	2843.73
4.0023	2829.27
4.06718	2959.41
4.0671	2944.95
4.06701	2930.49
4.06693	2916.03
4.06684	2901.57
4.06677	2888.92
4.09232	2872.65
4.09223	2858.19
4.09215	2843.73
4.09206	2829.27
4.092	2818.42
4.11881	3017.25
4.11873	3002.79
4.11864	2988.33
4.11856	2973.87
4.11847	2959.41
4.11839	2944.95
4.1183	2930.49
4.11822	2916.03
4.11813	2901.57
4.11805	2887.11
4.13078	2872.65
4.1307	2858.19
4.17	2999.17
4.16991	2984.71
4.16983	2970.25
4.16974	2955.79
4.16966	2941.33
4.16957	2926.87
4.1695	2914.22
4.15662	2905.18
4.2212	2984.71
4.22112	2970.25
4.22103	2955.79
4.22095	2941.33
4.22086	2926.87
4.208	2919.64
4.25067	2908.8
4.24629	2890.72
4.24621	2876.26
4.24612	2861.8
4.24604	2847.34
4.24595	2832.88
4.23309	2825.65
4.27704	3031.71
4.27266	3013.63
4.27258	2999.17
4.27249	2984.71
4.27241	2970.25
4.27232	2955.79
4.27224	2941.33
4.27215	2926.87
4.30196	2908.8
4.2848	2897.95
4.31124	3031.71
4.31115	3017.25
4.32387	2999.17
4.32378	2984.71
4.3237	2970.25
4.32361	2955.79
4.32353	2941.33
4.32344	2926.87
4.35325	2908.8
4.3489	2894.34
4.37937	2988.33
4.37499	2970.25
4.3749	2955.79
4.37482	2941.33
4.37473	2926.87
4.40514	3010.02
4.40029	2912.41
4.431	3046.17
4.42662	3028.09
4.41356	2988.33
4.41348	2973.87
4.41339	2959.41
4.41331	2944.95
4.41322	2930.49
4.45643	3010.02
4.45207	2995.56
4.4828	3132.93
4.47842	3114.85
4.47833	3100.39
4.47825	3085.93
4.47816	3071.47
4.47808	3057.01
4.47799	3042.55
4.47791	3028.09
4.50346	3011.83
4.5343	3169.08
4.52992	3151
4.52984	3136.54
4.52975	3122.08
4.52967	3107.62
4.52958	3093.16
4.5295	3078.7
4.52941	3064.24
4.52933	3049.78
4.52924	3035.32
4.51636	3024.48
4.5558	3190.77
4.58564	3176.31
4.58125	3158.23
4.58117	3143.77
4.58108	3129.31
4.581	3114.85
4.58091	3100.39
4.58083	3085.93
4.58074	3071.47
4.58066	3057.01
4.58057	3042.55
4.58049	3028.09
4.5804	3013.63
4.58033	3000.98
4.60711	3194.38
4.63265	3176.31
4.63257	3161.85
4.63248	3147.39
4.6324	3132.93
4.63231	3118.47
4.63223	3104.01
4.63214	3089.55
4.65847	3205.23
4.65838	3190.77
4.6449	3078.7
4.68822	3176.31
4.68384	3158.23
4.68375	3143.77
4.68367	3129.31
4.68358	3114.85
4.6835	3100.39
4.68343	3089.55
4.71424	3241.38
4.70986	3223.3
4.70978	3208.84
4.70969	3194.38
4.736	3306.45
4.73591	3291.99
4.73583	3277.53
4.73574	3263.07
4.72241	3176.31
4.72235	3165.46
4.76181	3335.37
4.76173	3320.91
4.7613	3248.61
4.76123	3235.96
4.79156	3306.45
4.78718	3288.37
4.7871	3273.91
4.78701	3259.45
4.79105	3219.69
4.78667	3201.61
4.78659	3187.15
4.7865	3172.69
4.77364	3165.46
4.81255	3241.38
4.84341	3400.44
4.83903	3382.36
4.83894	3367.9
4.83886	3353.44
4.83877	3338.98
4.83869	3324.52
4.8258	3313.68
4.82571	3299.22
4.82563	3284.76
4.82554	3270.3
4.82546	3255.84
4.82529	3226.92
4.8252	3212.46
4.86499	3436.59
4.8649	3422.13
4.89474	3407.67
4.89036	3389.59
4.89027	3375.13
4.89019	3360.67
4.8901	3346.21
4.89002	3331.75
4.88993	3317.29
4.88985	3302.83
4.88976	3288.37
4.87688	3277.53
4.92085	3487.2
4.91647	3469.12
4.91639	3454.66
4.9163	3440.2
4.91622	3425.74
4.94662	3508.89
4.92893	3407.67
4.97248	3545.04
4.9681	3526.96
4.96789	3490.81
4.95496	3472.74
4.95488	3458.28
4.95479	3443.82
4.95473	3432.97
4.99834	3581.19
4.99396	3563.11
4.98082	3508.89
5.02496	3747.48
5.02058	3729.4
5.0205	3714.94
5.02041	3700.48
5.02033	3686.02
5.02024	3671.56
5.02016	3657.1
5.02007	3642.64
5.01999	3628.18
5.0199	3613.72
5.01982	3599.26
5.05099	3812.55
5.04661	3794.47
5.04653	3780.01
5.04644	3765.55
5.03256	3584.8
5.07676	3834.24
5.07625	3747.48
5.07187	3729.4
5.05899	3718.56
5.0589	3704.1
5.05882	3689.64
5.05873	3675.18
5.05865	3660.72
5.05856	3646.26
5.0585	3635.41
5.09801	3812.55
5.09792	3798.09
5.09784	3783.63
5.09775	3769.17
5.12442	3942.69
5.12433	3928.23
5.12425	3913.77
5.12416	3899.31
5.12408	3884.85
5.12399	3870.39
5.12391	3855.93
5.12382	3841.47
5.12374	3827.01
5.12332	3756.52
5.15023	3971.61
5.15015	3957.15
5.1493	3812.55
5.14921	3798.09
5.14913	3783.63
5.14904	3769.17
5.14889	3743.86
5.17998	3942.69
5.1756	3924.61
5.17552	3910.15
5.17543	3895.69
5.17536	3883.04
5.16246	3870.39
5.16238	3855.93
5.16229	3841.47
5.16221	3827.01
5.16178	3754.71
5.20191	4036.68
5.20182	4022.22
5.20174	4007.76
5.20165	3993.3
5.20157	3978.84
5.20148	3964.38
5.22789	4094.52
5.22781	4080.06
5.22772	4065.6
5.22764	4051.14
5.25439	4239.12
5.2543	4224.66
5.25422	4210.2
5.25413	4195.74
5.25405	4181.28
5.25396	4166.82
5.25388	4152.36
5.25379	4137.9
5.25371	4123.44
5.25362	4108.98
5.25321	4038.49
5.24029	4022.22
5.2402	4007.76
5.24012	3993.3
5.24003	3978.84
5.23995	3964.38
5.28346	4094.52
5.27908	4076.44
5.27899	4061.98
5.27891	4047.52
5.31034	4304.19
5.30596	4286.11
5.30587	4271.65
5.30579	4257.19
5.3057	4242.73
5.30562	4228.27
5.30553	4213.81
5.30545	4199.35
5.30536	4184.89
5.30529	4172.24
5.29239	4159.59
5.2923	4145.13
5.29222	4130.67
5.29213	4116.21
5.36328	4586.16
5.3589	4568.08
5.35882	4553.62
5.35873	4539.16
5.35865	4524.7
5.35856	4510.24
5.35848	4495.78
5.35839	4481.32
5.35831	4466.86
5.35822	4452.4
5.35814	4437.94
5.35805	4423.48
5.35797	4409.02
5.35788	4394.56
5.3578	4380.1
5.35771	4365.64
5.35763	4351.18
5.35754	4336.72
5.35746	4322.26
5.35737	4307.8
5.35729	4293.34
5.3572	4278.88
5.35713	4266.23
5.34423	4253.58
5.41073	4658.46
5.41064	4644
5.41056	4629.54
5.41047	4615.08
5.41039	4600.62
5.4103	4586.16
5.41022	4571.7
5.41013	4557.24
5.41005	4542.78
5.40996	4528.32
5.40988	4513.86
5.40979	4499.4
5.40972	4486.75
5.43663	4701.84
5.43654	4687.38
5.43646	4672.92
5.46629	4658.46
5.46192	4642.19
5.44902	4629.54
5.44894	4615.08
5.44885	4600.62
5.44877	4586.16
5.44868	4571.7
5.4486	4557.24
5.44851	4542.78
5.44843	4528.32
5.44834	4513.86
5.44826	4499.4
5.44819	4488.55
5.49283	4810.29
5.48845	4792.21
5.48836	4777.75
5.48828	4763.29
5.48819	4748.83
5.48811	4734.37
5.48802	4719.91
5.48794	4705.45
5.48786	4692.8
5.47497	4680.15
5.51467	4889.82
5.51458	4875.36
5.5145	4860.9
5.51441	4846.44
5.51433	4831.98
5.54552	5048.88
5.54114	5030.8
5.54106	5016.34
5.54097	5001.88
5.54089	4987.42
5.5408	4972.96
5.54072	4958.5
5.54063	4944.04
5.54055	4929.58
5.54046	4915.12
5.54038	4900.66
5.52709	4821.13
5.56719	5099.49
5.56711	5085.03
5.56702	5070.57
5.55309	4882.59
5.59292	5113.95
5.59258	5056.11
5.57967	5041.65
5.57959	5027.19
5.5795	5012.73
5.57942	4998.27
5.57936	4987.42
5.61967	5301.93
5.61959	5287.47
5.6195	5273.01
5.61942	5258.55
5.61933	5244.09
5.61925	5229.63
5.61916	5215.17
5.61908	5200.71
5.61899	5186.25
5.61891	5171.79
5.61882	5157.33
5.61874	5142.87
5.61865	5128.41
5.61849	5101.29
5.60557	5085.03
5.60549	5070.57
5.64976	5330.85
5.64538	5312.77
5.63139	5113.95
5.67177	5439.3
5.67169	5424.84
5.6716	5410.38
5.67152	5395.92
5.67143	5381.46
5.67135	5367
5.67126	5352.54
5.6581	5294.7
5.65801	5280.24
5.65793	5265.78
5.65784	5251.32
5.65776	5236.86
5.65767	5222.4
5.65759	5207.94
5.6575	5193.48
5.65744	5182.63
5.69861	5641.74
5.69852	5627.28
5.69844	5612.82
5.69835	5598.36
5.69827	5583.9
5.69818	5569.44
5.6981	5554.98
5.69801	5540.52
5.69793	5526.06
5.69784	5511.6
5.69776	5497.14
5.69767	5482.68
5.69759	5468.22
5.6975	5453.76
5.684	5338.08
5.68391	5323.62
5.68383	5309.16
5.71024	5439.3
5.71015	5424.84
5.71007	5410.38
5.70998	5395.92
5.7099	5381.46
5.70981	5367
5.70973	5352.54
5.75105	5836.95
5.75096	5822.49
5.75088	5808.03
5.75079	5793.57
5.75071	5779.11
5.75062	5764.65
5.75054	5750.19
5.75045	5735.73
5.75037	5721.27
5.75028	5706.81
5.7502	5692.35
5.75011	5677.89
5.75003	5663.43
5.74994	5648.97
5.74986	5634.51
5.74977	5620.05
5.74969	5605.59
5.74961	5592.93
5.73669	5576.67
5.73661	5562.21
5.73652	5547.75
5.73644	5533.29
5.73635	5518.83
5.73627	5504.37
5.73618	5489.91
5.7361	5475.45
5.73601	5460.99
5.8067	5851.41
5.80232	5833.33
5.80223	5818.87
5.80215	5804.41
5.80206	5789.95
5.80198	5775.49
5.80189	5761.03
5.80182	5748.38
5.78892	5735.73
5.78883	5721.27
5.78875	5706.81
5.78866	5692.35
5.78858	5677.89
5.78849	5663.43
5.78841	5648.97
5.78832	5634.51
5.78824	5620.05
5.78815	5605.59
5.82845	5916.48
5.82836	5902.02
5.82828	5887.56
5.82819	5873.1
5.85376	5858.64
5.85367	5844.18
5.85358	5829.72
5.8535	5815.26
5.85341	5800.8
5.85334	5788.14
5.84042	5771.88
5.84034	5757.42
5.88418	5945.4
5.8798	5927.32
5.87972	5912.86
5.87963	5898.4
5.87955	5883.94
5.87946	5869.48
5.90928	5851.41
5.9049	5833.33
5.90481	5818.87
5.90473	5804.41
5.90464	5789.95
5.90456	5775.49
5.90447	5761.03
5.90439	5746.57
5.91829	5930.94
5.91821	5916.48
5.91812	5902.02
5.91804	5887.56
5.93078	5873.1
5.92993	5728.5
5.92984	5714.04
5.92976	5699.58
5.92967	5685.12
5.94351	5858.64
5.94343	5844.18
5.94334	5829.72
5.94326	5815.26
5.94317	5800.8
5.94309	5786.34
5.943	5771.88
5.94292	5757.42
5.94283	5742.96
5.9595	5670.66
5.95512	5652.58
5.95504	5638.12
5.95495	5623.66
5.95487	5609.2
5.96827	5706.81
5.96818	5692.35
5.98468	5591.13
5.9803	5573.05
5.98022	5558.59
5.98013	5544.13
5.98005	5529.67
5.97996	5515.21
5.97988	5500.75
5.97979	5486.29
5.97971	5471.83
5.97962	5457.37
5.97954	5442.91
6.00507	5424.84
6.00499	5410.38
6.0049	5395.92
6.00482	5381.46
6.00473	5367
6.00465	5352.54
6.00456	5338.08
6.00448	5323.62
6.00439	5309.16
6.00431	5294.7
6.00422	5280.24
6.00414	5265.78
6.00405	5251.32
6.00397	5236.86
6.00388	5222.4
6.00381	5209.74
6.01807	5453.76
6.01798	5439.3
6.02936	5193.48
6.02927	5179.02
6.02919	5164.56
6.0291	5150.1
6.02902	5135.64
6.05509	5207.94
6.05458	5121.18
6.05449	5106.72
6.05441	5092.26
6.05432	5077.8
6.05424	5063.34
6.05415	5048.88
6.05407	5034.42
6.05398	5019.96
6.0539	5005.5
6.05381	4991.04
6.05373	4976.58
6.05364	4962.12
6.06783	5193.48
6.06774	5179.02
6.06766	5164.56
6.06757	5150.1
6.06749	5135.64
6.0792	4947.66
6.07912	4933.2
6.07903	4918.74
6.07895	4904.28
6.07886	4889.82
6.07879	4877.17
6.10861	4860.9
6.10423	4842.82
6.10415	4828.36
6.10406	4813.9
6.10398	4799.44
6.10389	4784.98
6.10381	4770.52
6.10372	4756.06
6.10364	4741.6
6.10355	4727.14
6.10347	4712.68
6.10338	4698.22
6.1033	4683.76
6.10321	4669.3
6.10313	4654.84
6.09026	4647.61
6.12866	4636.77
6.12858	4622.31
6.12849	4607.85
6.12841	4593.39
6.12832	4578.93
6.12824	4564.47
6.12815	4550.01
6.12807	4535.55
6.12798	4521.09
6.14234	4781.37
6.14225	4766.91
6.14217	4752.45
6.14208	4737.99
6.142	4723.53
6.14191	4709.07
6.14183	4694.61
6.14174	4680.15
6.14166	4665.69
6.14157	4651.23
6.15354	4506.63
6.15346	4492.17
6.15337	4477.71
6.15329	4463.25
6.1532	4448.79
6.15312	4434.33
6.15303	4419.87
6.15295	4405.41
6.15286	4390.95
6.15278	4376.49
6.15269	4362.03
6.15261	4347.57
6.15252	4333.11
6.15244	4318.65
6.15235	4304.19
6.15227	4289.73
6.15218	4275.27
6.1521	4260.81
6.15201	4246.35
6.15193	4231.89
6.16645	4521.09
6.1775	4219.24
6.19099	4333.11
6.19091	4318.65
6.19082	4304.19
6.19074	4289.73
6.19065	4275.27
6.19057	4260.81
6.2033	4246.35
6.20322	4231.89
6.20305	4202.97
6.20296	4188.51
6.20288	4174.05
6.20279	4159.59
6.20271	4145.13
6.20262	4130.67
6.20254	4116.21
6.20245	4101.75
6.20237	4087.29
6.20228	4072.83
6.2022	4058.37
6.20211	4043.91
6.20203	4029.45
6.20194	4014.99
6.20186	4000.53
6.20177	3986.07
6.21596	4217.43
6.23161	3971.61
6.22723	3953.53
6.22714	3939.07
6.22706	3924.61
6.22697	3910.15
6.22689	3895.69
6.2268	3881.23
6.22672	3866.77
6.22663	3852.31
6.22655	3837.85
6.21368	3830.62
6.24054	4036.68
6.24045	4022.22
6.24037	4007.76
6.24028	3993.3
6.25636	3819.78
6.25198	3801.7
6.25189	3787.24
6.23903	3780.01
6.26546	3913.77
6.26538	3899.31
6.26529	3884.85
6.26521	3870.39
6.26512	3855.93
6.26504	3841.47
6.27743	3769.17
6.27735	3754.71
6.27726	3740.25
6.27718	3725.79
6.27709	3711.33
6.27701	3696.87
6.27692	3682.41
6.27684	3667.95
6.27675	3653.49
6.27667	3639.03
6.27658	3624.57
6.2765	3610.11
6.30206	3595.65
6.30197	3581.19
6.30189	3566.73
6.3018	3552.27
6.30172	3537.81
6.30163	3523.35
6.30156	3510.7
6.33138	3494.43
6.327	3476.35
6.32692	3461.89
6.32683	3447.43
6.32675	3432.97
6.32666	3418.51
6.32658	3404.05
6.32649	3389.59
6.32641	3375.13
6.32632	3360.67
6.32624	3346.21
6.32615	3331.75
6.32606	3317.29
6.32598	3302.83
6.35579	3284.76
6.35141	3266.68
6.35133	3252.22
6.35124	3237.76
6.35116	3223.3
6.35107	3208.84
6.33821	3201.61
6.37661	3190.77
6.37653	3176.31
6.37644	3161.85
6.37636	3147.39
6.37627	3132.93
6.37619	3118.47
6.40175	3104.01
6.40166	3089.55
6.40158	3075.09
6.40149	3060.63
6.40141	3046.17
6.40132	3031.71
6.40124	3017.25
6.40115	3002.79
6.40107	2988.33
6.40098	2973.87
6.4009	2959.41
6.40081	2944.95
6.40073	2930.49
6.42632	2921.45
6.45212	2948.56
6.45204	2934.1
6.45616	2908.8
6.45178	2890.72
6.4517	2876.26
6.45161	2861.8
6.45153	2847.34
6.45144	2832.88
6.45136	2818.42
6.45127	2803.96
6.45119	2789.5
6.4511	2775.04
6.45102	2760.58
6.45093	2746.12
6.48074	2728.05
6.47636	2709.97
6.47628	2695.51
6.47619	2681.05
6.48959	2778.66
6.48951	2764.2
6.48942	2749.74
6.50601	2662.98
6.50163	2644.9
6.50154	2630.44
6.50146	2615.98
6.50137	2601.52
6.50129	2587.06
6.5012	2572.6
6.48834	2565.37
6.53101	2554.53
6.52663	2536.45
6.52655	2521.99
6.52646	2507.53
6.52638	2493.07
6.52629	2478.61
6.52621	2464.15
6.51334	2456.92
6.53978	2590.68
6.53969	2576.22
6.565	2518.38
6.56491	2503.92
6.56482	2489.46
6.57756	2475
6.57748	2460.54
6.57739	2446.08
6.57731	2431.62
6.57722	2417.16
6.57714	2402.7
6.57705	2388.24
6.57697	2373.78
6.57688	2359.32
6.57681	2346.67
6.60663	2330.4
6.60225	2312.32
6.60217	2297.86
6.60208	2283.4
6.602	2268.94
6.60191	2254.48
6.60183	2240.02
6.58896	2232.79
6.61582	2438.85
6.61573	2424.39
6.61565	2409.93
6.61556	2395.47
6.61548	2381.01
6.61539	2366.55
6.61531	2352.09
6.62736	2221.95
6.62728	2207.49
6.62719	2193.03
6.65318	2250.87
6.65309	2236.41
6.65275	2178.57
6.65267	2164.11
6.65258	2149.65
6.68293	2221.95
6.67855	2203.88
6.67846	2189.42
6.69118	2171.34
6.7039	2153.27
6.70381	2138.81
6.70373	2124.35
6.73354	2106.27
6.72916	2088.2
6.72907	2073.74
6.72899	2059.28
6.7289	2044.82
6.72882	2030.36
6.75437	2014.09
6.76769	2099.04
6.7676	2084.58
6.76752	2070.12
6.76743	2055.66
6.78015	2037.59
6.78007	2023.13
6.78419	1997.82
6.77981	1979.75
6.77973	1965.29
6.77964	1950.83
6.76678	1943.6
6.80945	1932.75
6.80507	1914.68
6.80499	1900.22
6.8049	1885.76
6.80482	1871.3
6.80473	1856.84
6.83093	1950.83
6.83455	1838.76
6.84365	1932.75
6.85639	1918.29
6.8563	1903.83
6.85621	1889.37
6.85613	1874.91
6.85604	1860.45
6.85579	1817.07
6.8557	1802.61
6.85562	1788.15
6.85555	1775.5
6.88158	1842.38
6.8815	1827.92
6.88537	1759.23
6.88099	1741.16
6.89421	1809.84
6.89413	1795.38
6.89404	1780.92
6.90653	1723.08
6.90645	1710.43
6.93234	1752
6.93226	1737.54
6.932	1694.16
6.91912	1683.32
6.96235	1766.46
6.96209	1723.08
6.95771	1705.01
6.97077	1744.77
6.98752	1686.93
6.98314	1668.86
6.98306	1654.4
6.98297	1639.94
6.98289	1625.48
6.97002	1618.25
6.9962	1708.62
7.00843	1607.4
7.00835	1594.75
7.03431	1647.17
7.03422	1632.71
7.03414	1618.25
7.06395	1600.17
7.05957	1582.1
7.05948	1567.64
7.0594	1553.18
7.05931	1538.72
7.05923	1524.26
7.04636	1517.03
7.08543	1618.25
7.11094	1596.56
7.11086	1582.1
7.11077	1567.64
7.11069	1553.18
7.1106	1538.72
7.11052	1524.26
7.11043	1509.8
7.11035	1495.34
7.11027	1482.68
7.14935	1585.71
7.16206	1567.64
7.16198	1553.18
7.16189	1538.72
7.16181	1524.26
7.16172	1509.8
7.16164	1495.34
7.16155	1480.88
7.1871	1464.61
7.20026	1520.64
7.21297	1502.57
7.21289	1488.11
7.2128	1473.65
7.21693	1448.34
7.21255	1430.27
7.21246	1415.81
7.21239	1403.15
7.26411	1477.26
7.26403	1462.8
7.26394	1448.34
7.26386	1433.88
7.26377	1419.42
7.28933	1404.96
7.28925	1390.5
7.28916	1376.04
7.30258	1477.26
7.3025	1462.8
7.31523	1448.34
7.31515	1433.88
7.31506	1419.42
7.30192	1365.2
7.3449	1404.96
7.34052	1386.89
7.34043	1372.43
7.3664	1426.65
7.36597	1354.35
7.36591	1343.51
7.3964	1441.11
7.39623	1412.19
7.39185	1394.12
7.39177	1379.66
7.39168	1365.2
7.41799	1477.26
7.4179	1462.8
7.41722	1347.12
7.43064	1448.34
7.43055	1433.88
7.43047	1419.42
7.43038	1404.96
7.4303	1390.5
7.43021	1376.04
7.44295	1361.58
7.44278	1332.66
7.44269	1318.2
7.44261	1303.74
7.44255	1292.9
7.47278	1347.12
7.4983	1325.43
7.49392	1307.36
7.49386	1296.51
7.50698	1347.12
7.54536	1332.66
7.54528	1318.2
7.54519	1303.74
7.54511	1289.28
7.54502	1274.82
7.57124	1372.43
7.57115	1357.97
7.57107	1343.51
7.59661	1325.43
7.59652	1310.97
7.59644	1296.51
7.59635	1282.05
7.59627	1267.59
7.59618	1253.13
7.5961	1238.67
7.62661	1339.89
7.60886	1227.83
7.65213	1318.2
7.64775	1300.13
7.64767	1285.67
7.64758	1271.21
7.6475	1256.75
7.64743	1245.9
7.69904	1300.13
7.69896	1285.67
7.69887	1271.21
7.69879	1256.75
7.72432	1238.67
7.72424	1224.21
7.75441	1267.59
7.75003	1249.52
7.74983	1215.17
7.77557	1231.44
7.80592	1303.74
7.80154	1285.67
7.80145	1271.21
7.80137	1256.75
7.80128	1242.29
7.80541	1216.98
7.83092	1195.29
7.82655	1179.02
7.85712	1289.28
7.85274	1271.21
7.85266	1256.75
7.85257	1242.29
7.85249	1227.83
7.8524	1213.37
7.87862	1310.97
7.86512	1195.29
7.90433	1321.82
7.90846	1296.51
7.90407	1278.44
7.90399	1263.98
7.8911	1253.13
7.89102	1238.67
7.89093	1224.21
7.95539	1282.05
7.9553	1267.59
7.95522	1253.13
7.95513	1238.67
7.94225	1227.83
7.98539	1296.51
8.00695	1329.05
8.00687	1314.59
7.99381	1274.82
7.99373	1260.36
7.99364	1245.9
8.03241	1296.51
8.0625	1325.43
8.05812	1307.36
8.06224	1282.05
8.04508	1271.21
8.08827	1347.12
8.10985	1383.27
8.10977	1368.81
8.14028	1470.03
8.1359	1451.96
8.13582	1437.5
8.13573	1423.04
8.13565	1408.58
8.13556	1394.12
8.12251	1354.35
8.12242	1339.89
8.16111	1377.85
8.1876	1520.64
8.18751	1506.18
8.18743	1491.72
8.18734	1477.26
8.18726	1462.8
8.18717	1448.34
8.18709	1433.88
8.187	1419.42
8.18692	1404.96
8.18683	1390.5
8.2176	1535.1
8.23884	1513.41
8.23876	1498.95
8.23867	1484.49
8.23859	1470.03
8.2385	1455.57
8.23842	1441.11
8.23835	1428.46
8.22545	1415.81
8.265	1600.17
8.26492	1585.71
8.26483	1571.25
8.26475	1556.79
8.26466	1542.33
8.26458	1527.87
8.29016	1517.03
8.31672	1672.47
8.31663	1658.01
8.31655	1643.55
8.31646	1629.09
8.31638	1614.63
8.31629	1600.17
8.31621	1585.71
8.31612	1571.25
8.31604	1556.79
8.31596	1544.14
8.30304	1527.87
8.34672	1686.93
8.36796	1665.24
8.36788	1650.78
8.3678	1638.13
8.39856	1780.92
8.39418	1762.85
8.3941	1748.39
8.39401	1733.93
8.39393	1719.47
8.39384	1705.01
8.39376	1690.55
8.39367	1676.09
8.39763	1621.86
8.39326	1605.59
8.42442	1817.07
8.42004	1799
8.40639	1658.01
8.4063	1643.55
8.44986	1782.13
8.43267	1766.46
8.43261	1755.62
8.47614	1889.37
8.47176	1871.3
8.47167	1856.84
8.47159	1842.38
8.4587	1831.53
8.45862	1817.07
8.45853	1802.61
8.5279	1968.9
8.52352	1950.83
8.52343	1936.37
8.52335	1921.91
8.52326	1907.45
8.52317	1892.99
8.52309	1878.53
8.5102	1867.68
8.51012	1853.22
8.51005	1842.38
8.55375	2005.05
8.54937	1986.98
8.57987	2084.58
8.57549	2066.51
8.5754	2052.05
8.57532	2037.59
8.57523	2023.13
8.57493	1972.52
8.562	1954.44
8.56192	1939.98
8.56183	1925.52
8.56175	1911.06
8.56169	1900.22
8.60137	2106.27
8.60077	2005.05
8.60068	1990.59
8.63162	2164.11
8.62724	2146.04
8.62716	2131.58
8.62707	2117.12
8.6141	2091.81
8.61402	2077.35
8.61393	2062.89
8.61385	2048.43
8.61376	2033.97
8.61368	2019.51
8.61344	1979.75
8.65321	2200.26
8.65312	2185.8
8.6797	2344.86
8.67962	2330.4
8.67953	2315.94
8.67945	2301.48
8.67936	2287.02
8.67928	2272.56
8.67919	2258.1
8.67911	2243.64
8.67902	2229.18
8.67894	2214.72
8.66586	2171.34
8.66578	2156.88
8.66569	2142.42
8.66563	2131.58
8.69168	2200.26
8.69161	2189.42
8.73548	2381.01
8.7311	2362.93
8.73102	2348.47
8.73093	2334.01
8.73085	2319.55
8.73076	2305.09
8.71787	2294.25
8.71779	2279.79
8.7177	2265.33
8.71764	2254.48
8.76193	2518.38
8.75755	2500.3
8.75747	2485.84
8.75738	2471.38
8.7573	2456.92
8.75721	2442.46
8.75713	2428
8.75704	2413.54
8.75696	2399.08
8.78822	2626.83
8.78384	2608.75
8.78375	2594.29
8.78367	2579.83
8.78358	2565.37
8.7835	2550.91
8.78341	2536.45
8.76968	2381.01
8.76959	2366.55
8.81442	2720.82
8.81004	2702.74
8.80995	2688.28
8.80987	2673.82
8.80978	2659.36
8.8097	2644.9
8.79613	2518.38
8.79606	2507.53
8.83685	2901.57
8.83677	2887.11
8.83668	2872.65
8.8366	2858.19
8.83651	2843.73
8.83643	2829.27
8.83634	2814.81
8.83625	2800.35
8.83617	2785.89
8.83608	2771.43
8.836	2756.97
8.83591	2742.51
8.86796	3104.01
8.86358	3085.93
8.8635	3071.47
8.86341	3057.01
8.86332	3042.55
8.86324	3028.09
8.86315	3013.63
8.86307	2999.17
8.86298	2984.71
8.8629	2970.25
8.86281	2955.79
8.86273	2941.33
8.86264	2926.87
8.86256	2912.41
8.84867	2731.66
8.88988	3198
8.8898	3183.54
8.88971	3169.08
8.88963	3154.62
8.88954	3140.16
8.88946	3125.7
8.87528	2894.34
8.87519	2879.88
8.92108	3414.9
8.9167	3396.82
8.91661	3382.36
8.91653	3367.9
8.91644	3353.44
8.91636	3338.98
8.91627	3324.52
8.91619	3310.06
8.9161	3295.6
8.91602	3281.14
8.91593	3266.68
8.91585	3252.22
8.91576	3237.76
8.91568	3223.3
8.9156	3210.65
8.90222	3114.85
8.9436	3610.11
8.94351	3595.65
8.94343	3581.19
8.94334	3566.73
8.94326	3552.27
8.94317	3537.81
8.94309	3523.35
8.943	3508.89
8.94292	3494.43
8.94283	3479.97
8.94275	3465.51
8.94266	3451.05
8.94258	3436.59
8.96941	3639.03
8.96933	3624.57
8.96815	3423.94
8.98207	3610.11
8.98198	3595.65
8.9819	3581.19
8.98181	3566.73
8.99453	3548.65
8.99444	3534.19
8.99436	3519.73
8.99427	3505.27
8.99419	3490.81
8.9941	3476.35
8.99402	3461.89
8.99393	3447.43
8.99385	3432.97
8.99797	3407.67
8.99359	3389.59
8.99351	3375.13
8.99342	3360.67
8.99334	3346.21
8.99325	3331.75
8.99317	3317.29
8.9803	3310.06
9.01871	3299.22
9.01862	3284.76
9.01854	3270.3
9.01845	3255.84
9.01837	3241.38
9.01828	3226.92
9.0182	3212.46
9.01811	3198
9.01803	3183.54
9.01794	3169.08
9.01786	3154.62
9.01777	3140.16
9.01769	3125.7
9.04325	3111.24
9.04316	3096.78
9.04308	3082.32
9.04299	3067.86
9.04291	3053.4
9.04282	3038.94
9.04274	3024.48
9.04265	3010.02
9.04256	2995.56
9.04248	2981.1
9.04239	2966.64
9.04231	2952.18
9.04222	2937.72
9.04214	2923.26
9.04205	2908.8
9.04197	2894.34
9.04188	2879.88
9.0418	2865.42
9.04171	2850.96
9.04163	2836.5
9.04154	2822.04
9.04146	2807.58
9.04137	2793.12
9.06693	2778.66
9.06685	2764.2
9.06676	2749.74
9.06668	2735.28
9.06659	2720.82
9.06651	2706.36
9.06642	2691.9
9.06634	2677.44
9.06625	2662.98
9.06617	2648.52
9.06608	2634.06
9.066	2619.6
9.06591	2605.14
9.06583	2590.68
9.09139	2576.22
9.0913	2561.76
9.09122	2547.3
9.09113	2532.84
9.09105	2518.38
9.09096	2503.92
9.09088	2489.46
9.09079	2475
9.09071	2460.54
9.09062	2446.08
9.09054	2431.62
9.09045	2417.16
9.09037	2402.7
9.09029	2390.05
9.12012	2373.78
9.11574	2355.7
9.11565	2341.24
9.11557	2326.78
9.11548	2312.32
9.1154	2297.86
9.11531	2283.4
9.11523	2268.94
9.11514	2254.48
9.11506	2240.02
9.11497	2225.56
9.11489	2211.11
9.1148	2196.65
9.10194	2189.42
9.12896	2424.39
9.12888	2409.93
9.12879	2395.47
9.14034	2178.57
9.14025	2164.11
9.14017	2149.65
9.14008	2135.19
9.14	2120.73
9.13991	2106.27
9.16975	2091.81
9.16537	2073.74
9.17843	2113.5
9.19518	2055.66
9.1908	2037.59
9.19072	2023.13
9.19063	2008.67
9.19055	1994.21
9.19046	1979.75
9.1776	1972.52
9.216	1961.67
9.21591	1947.21
9.21583	1932.75
9.21574	1918.29
9.21566	1903.83
9.21557	1889.37
9.21549	1874.91
9.2154	1860.45
9.21532	1845.99
9.21523	1831.53
9.21515	1817.07
9.21506	1802.61
9.21498	1788.15
9.2149	1775.5
9.26663	1849.61
9.26655	1835.15
9.26646	1820.69
9.26638	1806.23
9.26629	1791.77
9.26621	1777.31
9.26612	1762.85
9.26604	1748.39
9.26595	1733.93
9.25309	1726.7
9.29576	1715.85
9.29138	1697.78
9.30495	1824.3
9.30486	1809.84
9.30478	1795.38
9.30469	1780.92
9.30461	1766.46
9.30452	1752
9.30444	1737.54
9.3212	1679.7
9.31682	1661.63
9.31673	1647.17
9.31665	1632.71
9.31656	1618.25
9.3421	1600.17
9.34201	1585.71
9.34193	1571.25
9.34185	1558.6
9.35518	1643.55
9.35509	1629.09
9.35501	1614.63
9.37168	1542.33
9.3673	1524.26
9.36721	1509.8
9.36713	1495.34
9.35426	1488.11
9.38044	1578.48
9.38035	1564.02
9.39267	1477.26
9.39258	1462.8
9.3925	1448.34
9.39241	1433.88
9.39233	1419.42
9.39224	1404.96
9.4178	1390.5
9.43096	1448.34
9.43088	1433.88
9.43079	1419.42
9.43071	1404.96
9.44336	1376.04
9.44328	1361.58
9.44319	1347.12
9.45627	1390.5
9.46876	1334.47
9.48183	1376.04
9.48174	1361.58
9.48166	1347.12
9.49859	1318.2
9.49421	1300.13
9.49412	1285.67
9.49404	1271.21
9.48117	1263.98
9.51957	1253.13
9.51949	1238.67
9.54506	1226.02
9.55804	1253.13
9.55796	1238.67
9.57488	1209.75
9.5705	1191.68
9.57042	1177.22
9.55755	1169.99
9.59596	1159.14
9.59587	1144.68
9.59579	1130.22
9.5957	1115.76
9.59562	1101.3
9.59553	1086.84
9.59546	1074.19
9.60895	1188.06
9.60886	1173.6
9.63417	1115.76
9.64689	1097.69
9.6468	1083.23
9.64672	1068.77
9.64663	1054.31
9.64655	1039.85
9.64646	1025.39
9.6336	1018.16
9.672	1007.31
9.67193	994.659
9.69807	1079.61
9.69799	1065.15
9.6979	1050.69
9.69782	1036.23
9.69773	1021.77
9.72329	1007.31
9.72321	992.851
9.7362	1021.77
9.74877	978.391
9.74868	963.931
9.7486	949.471
9.74851	935.011
9.74843	920.551
9.74834	906.091
9.76167	992.851
9.77817	891.631
9.77379	873.556
9.76093	866.326
9.78702	942.241
9.79974	924.166
9.79965	909.706
9.80361	856.686
9.82519	891.631
9.82511	877.171
9.8509	902.476
9.85494	862.711
9.85056	844.636
9.85047	830.176
9.85039	815.716
9.8503	801.256
9.86362	884.401
9.90183	841.021
9.90174	826.561
9.90166	812.101
9.90157	797.641
9.90149	783.181
9.92706	770.529
9.95301	822.946
9.95293	808.486
9.95284	794.026
9.95276	779.566
9.95688	754.261
9.9525	736.186
9.95242	721.726
9.95233	707.266
10.0041	786.796
10.004	772.336
10.0039	757.876
10.0038	743.416
10.0038	728.956
10.0037	714.496
10.0036	700.036
9.99071	692.806
10.055	714.496
10.0549	700.036
10.0548	685.576
10.0547	674.731
10.0934	710.881
10.1061	696.421
10.106	681.961
10.106	667.501
10.1059	653.041
10.1357	638.581
10.1313	620.506
10.1185	613.276
10.1445	674.731
10.1572	656.656
10.187	638.581
10.1826	620.506
10.1825	606.046
10.1825	591.586
10.2086	671.116
10.2085	656.656
10.2123	573.511
10.2212	638.581
10.2211	624.121
10.221	609.661
10.2338	595.201
10.2335	555.436
10.2636	580.741
10.2592	562.666
10.2723	602.431
10.272	548.206
10.3107	587.971
10.3106	573.511
10.3105	559.051
10.3361	544.591
10.336	530.131
10.3359	515.671
10.349	559.051
10.3873	540.976
10.3872	526.516
10.3872	512.056
10.4386	533.746
10.4385	519.286
10.4384	504.827
10.4383	490.367
10.4254	483.137
10.477	522.901
10.4769	508.442
10.4896	493.982
10.4895	479.522
10.4895	465.062
10.4894	450.602
10.515	443.372
10.541	501.212
10.5409	486.752
10.5408	472.292
10.5407	457.832
10.5923	512.056
10.5922	497.597
10.5921	483.137
10.5921	468.677
10.5792	461.447
10.6176	450.602
10.6175	436.142
10.6433	465.062
10.6431	421.682
10.6732	450.602
10.6688	432.527
10.6687	414.452
10.6946	468.677
10.7202	450.602
10.7201	436.142
10.72	421.682
10.7199	407.222
10.7198	394.569
10.7454	383.724
10.7757	443.372
10.7713	425.297
10.7712	410.837
10.7712	396.377
10.7967	381.917
10.81	457.832
10.8099	443.372
10.8226	425.297
10.8225	410.837
10.8224	396.377
10.848	383.724
10.8738	410.837
10.8737	396.377
10.8993	378.302
10.8992	365.649
10.9123	407.222
10.925	392.762
10.9248	352.997
10.9506	378.302
10.9505	363.842
10.9806	392.762
11.0018	371.072
11.0017	356.612
11.0278	428.912
11.0277	414.452
11.0276	399.992
11.0275	385.532
11.0531	367.457
11.053	352.997
11.0529	338.537
11.0528	327.692
11.0915	356.612
11.1042	342.152
11.1041	329.499
11.1297	313.232
11.1296	298.772
11.1555	342.152
11.1554	327.692
11.1853	313.232
11.1681	302.387
11.211	334.922
11.2368	356.612
11.2365	313.232
11.2322	296.964
11.2623	334.922
11.2878	313.232
11.2707	302.387
11.3093	334.922
11.3349	320.462
11.3348	306.002
11.3478	334.922
11.3604	296.964
11.3861	309.617
11.3902	284.312
11.3859	266.237
11.4374	313.232
11.4374	298.772
11.4373	284.312
11.4372	269.852
11.4243	259.007
11.4929	291.542
11.4885	273.467
11.4884	260.814
11.5442	291.542
11.5398	273.467
11.5397	259.007
11.5652	240.932
11.5651	226.472
11.5912	295.157
11.5911	280.697
11.591	266.237
11.5909	251.777
11.6165	239.124
11.6423	255.392
11.6723	284.312
11.668	266.237
11.655	240.932
11.6935	251.777
11.7194	291.542
11.7193	277.082
11.7192	262.622
11.7448	251.777
11.7707	291.542
11.7706	277.082
11.7705	262.622
11.8004	248.162
11.7832	237.317
11.809	269.852
11.8474	255.392
11.8473	240.932
11.8729	226.472
11.9031	269.852
11.8987	251.777
11.8858	240.932
11.8857	215.627
11.9502	284.312
11.9501	269.852
11.95	255.392
11.9628	244.547
12.0015	284.312
12.0014	269.852
12.0013	257.199
12.0572	306.002
12.0528	287.927
12.0527	273.467
12.0786	327.692
12.0654	259.007
12.1044	342.152
12.1042	313.232
12.1041	300.579
12.0912	284.312
12.0911	269.852
12.1299	327.692
12.1558	356.612
12.1557	342.152
12.1427	316.847
12.1815	371.072
12.1813	331.307
12.2115	385.532
12.2113	356.612
12.2069	338.537
12.2197	324.077
12.2585	385.532
12.2584	371.072
12.2455	356.612
12.2842	399.992
12.3098	381.917
12.3097	367.457
12.2968	360.227
12.3395	349.382
12.3224	338.537
12.3653	371.072
12.365	327.692
12.3868	392.762
12.3865	349.382
12.4123	374.687
12.4122	360.227
12.4164	334.922
12.412	316.847
12.3991	309.617
12.4418	298.772
12.4505	320.462
12.463	278.889
12.4888	306.002
12.4888	291.542
12.4886	262.622
12.5143	277.082
12.5401	302.387
12.54	287.927
12.5442	262.622
12.527	251.777
12.5913	277.082
12.5912	262.622
12.5911	248.162
12.591	237.317
12.6467	262.622
12.6424	244.547
12.6423	233.702
12.6938	277.082
12.6937	262.622
12.6937	248.162
12.6936	233.702
12.6807	222.857
12.7451	273.467
12.745	259.007
12.7449	244.547
12.7449	231.894
12.7836	277.082
12.7963	259.007
12.7962	244.547
12.7961	230.087
12.7961	219.242
12.8475	240.932
12.8474	226.472
12.8732	251.777
12.8987	233.702
12.9246	262.622
12.9245	248.162
12.95	233.702
12.9499	219.242
12.9499	208.397
12.9758	248.162
13.0056	233.702
13.0272	266.237
[truncated: 4,018 more rows]

## Sheet: SG-04-Glycolated
2Theta	Counts (I)
3.24056	4811.8
3.24048	4795.5
3.2404	4779.2
3.24032	4762.9
3.24023	4746.59
3.25295	4726.22
3.25287	4709.91
3.25279	4693.61
3.25271	4677.31
3.25262	4661.01
3.25254	4644.7
3.27809	4624.33
3.278	4608.02
3.27792	4591.72
3.27784	4575.42
3.27776	4559.12
3.29132	4705.84
3.29124	4689.54
3.29115	4673.23
3.29107	4656.93
3.29099	4640.63
3.33365	4624.33
3.32927	4603.95
3.32919	4587.65
3.32911	4571.34
3.32903	4555.04
3.32894	4538.74
3.32886	4522.44
3.32878	4506.14
3.3287	4489.83
3.32862	4473.53
3.32853	4457.23
3.31567	4449.08
3.35523	4665.08
3.35514	4648.78
3.35408	4436.85
3.35399	4420.55
3.35392	4406.28
3.36788	4632.48
3.3678	4616.18
3.36772	4599.87
3.38046	4583.57
3.38038	4567.27
3.3803	4550.97
3.38021	4534.66
3.38013	4518.36
3.38005	4502.06
3.37997	4485.76
3.37989	4469.46
3.3798	4453.15
3.40537	4436.85
3.40528	4420.55
3.4052	4404.25
3.40512	4387.94
3.40504	4371.64
3.40495	4355.34
3.40487	4339.04
3.40479	4322.74
3.40471	4306.43
3.40463	4290.13
3.40455	4275.87
3.4314	4514.29
3.43132	4497.98
3.43124	4481.68
3.43115	4465.38
3.43107	4449.08
3.46089	4428.7
3.45651	4408.32
3.45643	4392.02
3.45635	4375.72
3.45627	4359.42
3.45618	4343.11
3.4561	4326.81
3.45602	4310.51
3.45594	4294.21
3.45585	4277.9
3.46981	4502.06
3.46973	4485.76
3.46964	4469.46
3.46956	4453.15
3.48567	4257.53
3.48129	4237.15
3.48121	4220.85
3.48113	4204.54
3.48106	4190.28
3.50772	4392.02
3.50764	4375.72
3.50756	4359.42
3.50747	4343.11
3.50739	4326.81
3.50731	4310.51
3.50723	4294.21
3.50715	4277.9
3.53696	4257.53
3.53259	4237.15
3.5325	4220.85
3.53242	4204.54
3.53234	4188.24
3.53226	4171.94
3.53217	4155.64
3.53209	4139.34
3.53201	4123.03
3.53194	4108.77
3.55876	4343.11
3.55868	4326.81
3.5586	4310.51
3.55852	4294.21
3.55844	4277.9
3.58825	4257.53
3.58388	4237.15
3.58379	4220.85
3.58371	4204.54
3.57085	4196.39
3.59692	4281.98
3.60925	4184.17
3.60917	4167.86
3.60909	4151.56
3.60901	4135.26
3.60892	4118.96
3.60884	4102.66
3.60876	4086.35
3.60868	4070.05
3.6086	4053.75
3.60851	4037.45
3.62249	4265.68
3.6224	4249.38
3.63512	4229
3.63504	4212.7
3.63496	4196.39
3.66478	4176.02
3.6604	4155.64
3.66032	4139.34
3.66024	4123.03
3.66015	4106.73
3.66007	4090.43
3.65999	4074.13
3.65991	4057.82
3.65982	4041.52
3.65975	4027.26
3.6865	4245.3
3.68642	4229
3.68633	4212.7
3.68625	4196.39
3.71607	4176.02
3.71169	4155.64
3.71161	4139.34
3.71153	4123.03
3.71144	4106.73
3.71136	4090.43
3.71128	4074.13
3.7112	4057.82
3.71112	4041.52
3.71103	4025.22
3.71095	4008.92
3.71087	3992.61
3.71079	3976.31
3.7107	3960.01
3.69784	3951.86
3.73754	4196.39
3.74052	3939.63
3.73614	3919.25
3.73607	3904.99
3.75026	4176.02
3.75018	4159.71
3.7501	4143.41
3.75001	4127.11
3.74993	4110.81
3.76265	4090.43
3.76257	4074.13
3.76249	4057.82
3.76241	4041.52
3.76232	4025.22
3.76224	4008.92
3.76216	3992.61
3.76208	3976.31
3.76199	3960.01
3.78754	3939.63
3.78745	3923.33
3.78737	3907.03
3.81368	4037.45
3.81359	4021.14
3.81351	4004.84
3.81343	3988.54
3.81335	3972.24
3.81326	3955.93
3.81295	3892.76
3.83949	4070.05
3.8394	4053.75
3.83883	3939.63
3.83875	3923.33
3.83866	3907.03
3.8385	3874.42
3.83843	3860.16
3.85214	4037.45
3.85206	4021.14
3.86478	4000.77
3.8647	3984.46
3.86462	3968.16
3.86453	3951.86
3.8685	3890.73
3.86825	3841.82
3.86388	3821.44
3.85101	3813.29
3.89435	3931.48
3.88997	3911.1
3.89402	3866.27
3.90319	3988.54
3.9031	3972.24
3.90302	3955.93
3.91979	3890.73
3.94556	3915.18
3.94531	3866.27
3.92815	3854.05
3.96681	3890.73
3.96656	3841.82
3.96648	3825.52
3.9664	3809.21
3.99714	3972.24
3.99276	3951.86
3.99268	3935.56
3.9926	3919.25
3.99251	3902.95
3.99664	3874.42
3.99227	3854.05
3.99623	3792.91
3.99186	3772.53
3.97897	3760.31
4.02208	3833.67
4.0049	3817.37
4.04415	3972.24
4.04407	3955.93
4.04399	3939.63
4.04391	3923.33
4.04382	3907.03
4.04374	3890.73
4.04366	3874.42
4.04358	3858.12
4.06914	3841.82
4.06906	3825.52
4.06898	3809.21
4.06892	3796.99
4.09528	3939.63
4.0952	3923.33
4.09512	3907.03
4.09503	3890.73
4.09495	3874.42
4.09487	3858.12
4.12043	3841.82
4.12035	3825.52
4.12027	3809.21
4.14624	3874.42
4.14616	3858.12
4.14583	3792.91
4.17641	3923.33
4.17203	3902.95
4.17195	3886.65
4.176	3841.82
4.17162	3821.44
4.15874	3809.21
4.19749	3866.27
4.22355	3947.78
4.22346	3931.48
4.22338	3915.18
4.2233	3898.88
4.22322	3882.57
4.22305	3849.97
4.22297	3833.67
4.21007	3817.37
4.24878	3866.27
4.27878	3882.57
4.27862	3849.97
4.27424	3829.59
4.27416	3813.29
4.32625	3972.24
4.32617	3955.93
4.32609	3939.63
4.326	3923.33
4.32592	3907.03
4.32584	3890.73
4.32576	3874.42
4.32568	3858.12
4.3256	3843.86
4.31269	3825.52
4.31263	3813.29
4.37746	3955.93
4.37738	3939.63
4.37729	3923.33
4.37721	3907.03
4.40705	3890.73
4.38987	3874.42
4.43315	3980.39
4.42877	3960.01
4.42869	3943.71
4.42861	3927.41
4.42852	3911.1
4.45933	4086.35
4.45495	4065.97
4.45487	4049.67
4.45479	4033.37
4.4547	4017.07
4.45462	4000.77
4.45411	3898.88
4.48444	3980.39
4.48007	3962.05
4.46718	3947.78
4.46709	3931.48
4.46701	3915.18
4.50665	4147.49
4.50657	4131.18
4.50649	4114.88
4.5064	4098.58
4.50632	4082.28
4.50624	4065.97
4.50616	4049.67
4.50608	4033.37
4.50599	4017.07
4.50591	4000.77
4.53145	3980.39
4.53137	3964.09
4.53129	3947.78
4.53122	3933.52
4.5585	4257.53
4.55841	4241.22
4.55833	4224.92
4.55825	4208.62
4.55817	4192.32
4.55809	4176.02
4.558	4159.71
4.55792	4143.41
4.55784	4127.11
4.55776	4110.81
4.55767	4094.5
4.55759	4078.2
4.55751	4061.9
4.55744	4047.63
4.54452	4029.29
4.54444	4012.99
4.54436	3996.69
4.61394	4233.07
4.60956	4212.7
4.60948	4196.39
4.6094	4180.09
4.60931	4163.79
4.60924	4149.52
4.59635	4135.26
4.59627	4118.96
4.59618	4102.66
4.5961	4086.35
4.64012	4339.04
4.63574	4318.66
4.63566	4302.36
4.63558	4286.06
4.63549	4269.75
4.63541	4253.45
4.64813	4233.07
4.64805	4216.77
4.64797	4200.47
4.64788	4184.17
4.6478	4167.86
4.69178	4412.4
4.6874	4392.02
4.68732	4375.72
4.68724	4359.42
4.68715	4343.11
4.68707	4326.81
4.68699	4310.51
4.67411	4298.28
4.67402	4281.98
4.67394	4265.68
4.67388	4253.45
4.71393	4567.27
4.71385	4550.97
4.71376	4534.66
4.71368	4518.36
4.7136	4502.06
4.71352	4485.76
4.71344	4469.46
4.71335	4453.15
4.71327	4436.85
4.74311	4420.55
4.73874	4402.21
4.72585	4387.94
4.72577	4371.64
4.72568	4355.34
4.7256	4339.04
4.766	4722.14
4.76592	4705.84
4.76584	4689.54
4.76575	4673.23
4.76567	4656.93
4.76559	4640.63
4.76551	4624.33
4.76543	4608.02
4.76534	4591.72
4.76526	4575.42
4.76518	4559.12
4.7651	4542.82
4.76501	4526.51
4.76493	4510.21
4.76485	4493.91
4.76477	4477.61
4.7647	4463.34
4.75178	4445
4.82165	4738.44
4.81727	4718.06
4.81719	4701.76
4.81711	4685.46
4.81702	4669.16
4.81694	4652.86
4.81687	4638.59
4.80398	4624.33
4.80389	4608.02
4.80381	4591.72
4.80373	4575.42
4.80365	4559.12
4.80358	4546.89
4.84339	4811.8
4.84331	4795.5
4.84322	4779.2
4.84314	4762.9
4.87355	4860.71
4.86918	4840.33
4.8691	4824.03
4.85588	4746.59
4.8558	4730.29
4.85572	4713.99
4.85564	4697.69
4.85557	4685.46
4.89941	4901.47
4.89503	4881.09
4.89892	4805.01
4.88175	4791.42
4.92484	4860.71
4.92047	4840.33
4.9204	4826.07
4.95201	5162.3
4.94763	5141.92
4.94755	5125.62
4.94747	5109.32
4.94739	5093.02
4.9473	5076.71
4.94722	5060.41
4.94714	5044.11
4.94706	5027.81
4.94698	5011.51
4.94689	4995.2
4.94681	4978.9
4.94673	4962.6
4.94665	4946.3
4.94657	4929.99
4.94648	4913.69
4.94641	4899.43
4.93352	4885.16
4.97392	5268.27
4.97383	5251.96
4.97375	5235.66
4.97367	5219.36
4.97359	5203.06
4.9735	5186.75
4.99989	5333.47
4.99981	5317.17
4.99973	5300.87
4.99964	5284.57
4.99907	5170.45
5.02997	5366.08
5.0256	5345.7
5.02949	5269.62
5.0123	5251.96
5.01222	5235.66
5.01214	5219.36
5.01205	5203.06
5.01197	5186.75
5.0518	5455.74
5.05171	5439.44
5.05163	5423.14
5.05155	5406.83
5.05147	5390.53
5.03832	5325.32
5.03823	5309.02
5.03815	5292.72
5.08229	5569.86
5.07791	5549.48
5.07783	5533.18
5.07775	5516.87
5.07767	5500.57
5.07759	5484.27
5.0775	5467.97
5.06421	5374.23
5.06415	5362
5.10453	5741.03
5.10444	5724.73
5.10436	5708.43
5.10428	5692.12
5.1042	5675.82
5.10411	5659.52
5.10403	5643.22
5.10395	5626.91
5.10387	5610.61
5.10379	5594.31
5.09022	5447.59
5.09014	5431.29
5.09006	5414.99
5.09	5402.76
5.13469	5789.94
5.13031	5769.56
5.13023	5753.26
5.12938	5584.12
5.15651	5879.6
5.15643	5863.3
5.15635	5847
5.15627	5830.69
5.15619	5814.39
5.15577	5732.88
5.14287	5716.58
5.14279	5700.28
5.14271	5683.97
5.14262	5667.67
5.14254	5651.37
5.14246	5635.07
5.14238	5618.76
5.14229	5602.46
5.18693	5977.41
5.18255	5957.04
5.18247	5940.73
5.18239	5924.43
5.1823	5908.13
5.18222	5891.83
5.16893	5798.09
5.16884	5781.79
5.16876	5765.48
5.16868	5749.18
5.21278	6018.17
5.2084	5997.79
5.19494	5871.45
5.19486	5855.15
5.23855	6042.62
5.23822	5977.41
5.23385	5959.07
5.22098	5948.88
5.26095	6246.4
5.26086	6230.1
5.26078	6213.8
5.2607	6197.49
5.26062	6181.19
5.26053	6164.89
5.26045	6148.59
5.26037	6132.28
5.26029	6115.98
5.26021	6099.68
5.26012	6083.38
5.26004	6067.08
5.25979	6018.17
5.25971	6001.87
5.2856	6050.77
5.28552	6034.47
5.28528	5985.56
5.28519	5969.26
5.28511	5952.96
5.28504	5938.7
5.29876	6115.98
5.29867	6099.68
5.29859	6083.38
5.29851	6067.08
5.29826	6018.17
5.29818	6001.87
5.31487	5920.36
5.31049	5899.98
5.31041	5883.68
5.31032	5867.37
5.34063	5944.81
5.34906	5920.36
5.34898	5904.05
5.36172	5887.75
5.36164	5871.45
5.36155	5855.15
5.36147	5838.84
5.36139	5822.54
5.36131	5806.24
5.36122	5789.94
5.36114	5773.64
5.36106	5757.33
5.36098	5741.03
5.3609	5724.73
5.36081	5708.43
5.36073	5692.12
5.36065	5675.82
5.36057	5659.52
5.36048	5643.22
5.3604	5626.91
5.36033	5612.65
5.38588	5594.31
5.3858	5578.01
5.38572	5561.71
5.38564	5545.4
5.38555	5529.1
5.38547	5512.8
5.38539	5496.5
5.38531	5480.19
5.38523	5463.89
5.38514	5447.59
5.38506	5431.29
5.38498	5414.99
5.38491	5400.72
5.39912	5675.82
5.39903	5659.52
5.39895	5643.22
5.39887	5626.91
5.39879	5610.61
5.41473	5382.38
5.41036	5362
5.41027	5345.7
5.41019	5329.4
5.41011	5313.1
5.41003	5296.79
5.40995	5280.49
5.40986	5264.19
5.40978	5247.89
5.4097	5231.59
5.40962	5215.28
5.40954	5198.98
5.40945	5182.68
5.40937	5166.38
5.39651	5158.23
5.43491	5146
5.43483	5129.7
5.43475	5113.39
5.43467	5097.09
5.43458	5080.79
5.4345	5064.49
5.43442	5048.19
5.43434	5031.88
5.43426	5015.58
5.43417	4999.28
5.43409	4982.98
5.43401	4966.67
5.43393	4950.37
5.43384	4934.07
5.43376	4917.77
5.43368	4901.47
5.4336	4885.16
5.43352	4868.86
5.43343	4852.56
5.43335	4836.26
5.43327	4819.95
5.45884	4805.69
5.47207	4885.16
5.47198	4868.86
5.4719	4852.56
5.47182	4836.26
5.47174	4819.95
5.48867	4787.35
5.48429	4766.97
5.48421	4750.67
5.48413	4734.37
5.48405	4718.06
5.48396	4701.76
5.48388	4685.46
5.4838	4669.16
5.48372	4652.86
5.48364	4636.55
5.48355	4620.25
5.48347	4603.95
5.48339	4587.65
5.48331	4571.34
5.48322	4555.04
5.48314	4538.74
5.47028	4530.59
5.50868	4518.36
5.5086	4502.06
5.50852	4485.76
5.50844	4469.46
5.50836	4453.15
5.50827	4436.85
5.50819	4420.55
5.50811	4404.25
5.50803	4387.94
5.50794	4371.64
5.50786	4355.34
5.50778	4339.04
5.5077	4322.74
5.50762	4306.43
5.50753	4290.13
5.50745	4273.83
5.50737	4257.53
5.50729	4241.22
5.5072	4224.92
5.50713	4210.66
5.53269	4192.32
5.5326	4176.02
5.53252	4159.71
5.53244	4143.41
5.53236	4127.11
5.53227	4110.81
5.53219	4094.5
5.53211	4078.2
5.53203	4061.9
5.53195	4045.6
5.53186	4029.29
5.53179	4015.03
5.54567	4224.92
5.54559	4208.62
5.56162	3996.69
5.55724	3976.31
5.55716	3960.01
5.55708	3943.71
5.557	3927.41
5.55691	3911.1
5.55683	3894.8
5.55675	3878.5
5.54388	3870.35
5.58229	3858.12
5.58221	3841.82
5.58213	3825.52
5.58204	3809.21
5.58196	3792.91
5.58188	3776.61
5.5818	3760.31
5.58172	3744.01
5.58163	3727.7
5.6072	3711.4
5.60711	3695.1
5.60703	3678.8
5.60695	3662.49
5.60687	3646.19
5.60679	3629.89
5.6067	3613.59
5.60662	3597.29
5.60654	3580.98
5.60646	3564.68
5.60637	3548.38
5.60629	3532.08
5.60621	3515.77
5.63177	3499.47
5.63169	3483.17
5.63161	3466.87
5.63153	3450.57
5.63144	3434.26
5.63136	3417.96
5.63128	3401.66
5.6312	3385.36
5.63113	3371.09
5.66095	3352.75
5.65658	3332.37
5.65649	3316.07
5.65641	3299.77
5.65633	3283.47
5.65625	3267.16
5.68606	3246.79
5.68169	3226.41
5.6816	3210.11
5.68152	3193.8
5.68144	3177.5
5.68136	3161.2
5.68128	3144.9
5.68119	3128.6
5.68111	3112.29
5.68103	3095.99
5.68095	3079.69
5.68086	3063.39
5.68078	3047.08
5.6807	3030.78
5.68062	3014.48
5.68054	2998.18
5.68045	2981.88
5.66759	2973.72
5.7196	3116.37
5.71952	3100.07
5.71944	3083.76
5.71935	3067.46
5.71927	3051.16
5.71919	3034.86
5.73191	3014.48
5.73183	2998.18
5.73174	2981.88
5.73166	2965.57
5.73158	2949.27
5.7315	2932.97
5.73142	2916.67
5.73133	2900.36
5.73125	2884.06
5.73117	2867.76
5.73109	2851.46
5.731	2835.16
5.73092	2818.85
5.73084	2802.55
5.73076	2786.25
5.76057	2765.87
5.7562	2745.49
5.76933	2806.63
5.76925	2790.32
5.78174	2725.12
5.78167	2710.85
5.80753	2753.64
5.80745	2737.34
5.8115	2692.51
5.80712	2672.13
5.80704	2655.83
5.80695	2639.53
5.80687	2623.23
5.80679	2606.92
5.80671	2590.62
5.80663	2574.32
5.80654	2558.02
5.79368	2549.87
5.82017	2716.96
5.83636	2537.64
5.83198	2517.26
5.8319	2500.96
5.83182	2484.66
5.83174	2468.35
5.83165	2452.05
5.83157	2435.75
5.83149	2419.45
5.86131	2399.07
5.85693	2378.69
5.87031	2488.73
5.87022	2472.43
5.88296	2456.13
5.88288	2439.83
5.8828	2423.52
5.88247	2358.31
5.88239	2342.01
5.88231	2325.71
5.88222	2309.41
5.88214	2293.11
5.88206	2276.8
5.88198	2260.5
5.8819	2244.2
5.88182	2229.93
5.89554	2407.22
5.89546	2390.92
5.89538	2374.62
5.90738	2211.59
5.92036	2244.2
5.92028	2227.9
5.93294	2195.29
5.93286	2178.99
5.93278	2162.69
5.93269	2146.39
5.93261	2130.08
5.93253	2113.78
5.93245	2097.48
5.93236	2081.18
5.94584	2211.59
5.95793	2064.87
5.95785	2048.57
5.95777	2034.31
5.9838	2109.71
5.98372	2093.4
5.98363	2077.1
5.9876	2015.97
5.98322	1995.59
5.98314	1979.29
5.98306	1962.99
5.98298	1946.68
5.97011	1938.53
5.99635	2056.72
5.99627	2040.42
6.01279	1926.31
6.00842	1905.93
5.99555	1897.78
6.02147	1950.76
6.03396	1885.55
6.03388	1869.25
6.03379	1852.95
6.03372	1838.68
6.04695	1918.15
6.04686	1901.85
6.05928	1820.34
6.08498	1832.57
6.08911	1804.04
6.08474	1783.66
6.08465	1767.36
6.08457	1751.06
6.11011	1730.68
6.11003	1714.38
6.10995	1698.07
6.10987	1681.77
6.1098	1667.51
6.12327	1795.89
6.12318	1779.59
6.1231	1763.28
6.13584	1746.98
6.13535	1649.17
6.13527	1632.86
6.13518	1616.56
6.1351	1600.26
6.14858	1730.68
6.1485	1714.38
6.14842	1698.07
6.14834	1681.77
6.14825	1665.47
6.1607	1590.07
6.1866	1641.02
6.18652	1624.71
6.18643	1608.41
6.18627	1575.81
6.18619	1559.5
6.1861	1543.2
6.18602	1526.9
6.18594	1510.6
6.18586	1494.3
6.18578	1477.99
6.1857	1463.73
6.19917	1592.11
6.23737	1539.13
6.23729	1522.82
6.23721	1506.52
6.23713	1490.22
6.23705	1473.92
6.23696	1457.62
6.2241	1449.46
6.26251	1437.24
6.27541	1453.54
6.28807	1420.94
6.28799	1404.63
6.2879	1388.33
6.28782	1372.03
6.28774	1355.73
6.28766	1339.42
6.28759	1325.16
6.32629	1372.03
6.33903	1355.73
6.33895	1339.42
6.33888	1325.16
6.36443	1306.82
6.36435	1290.52
6.36426	1274.22
6.36418	1257.91
6.3641	1241.61
6.36404	1229.38
6.3775	1355.73
6.37742	1339.42
6.37733	1323.12
6.41568	1298.67
6.4156	1282.37
6.41551	1266.06
6.41543	1249.76
6.41536	1235.5
6.44519	1217.16
6.44081	1196.78
6.44073	1180.48
6.44065	1164.18
6.46685	1274.22
6.46676	1257.91
6.46668	1241.61
6.49222	1221.23
6.49214	1204.93
6.49206	1188.63
6.49198	1172.33
6.49189	1156.02
6.49181	1139.72
6.49175	1127.5
6.53042	1168.25
6.54316	1151.95
6.54308	1135.65
6.543	1119.34
6.54292	1103.04
6.54284	1086.74
6.54275	1070.44
6.54268	1056.17
6.57251	1037.83
6.56813	1017.46
6.58151	1127.5
6.58143	1111.19
6.59417	1094.89
6.59409	1078.59
6.594	1062.29
6.61957	1045.98
6.61948	1029.68
6.6194	1013.38
6.61932	997.077
6.61925	982.813
6.64527	1058.21
6.67509	1037.83
6.67071	1017.46
6.67063	1001.15
6.67055	984.851
6.70916	1013.38
6.72188	993.002
6.7218	976.699
6.72172	960.397
6.72164	946.133
6.77313	984.851
6.77305	968.548
6.77296	952.246
6.77288	935.944
6.81162	988.926
6.82436	972.624
6.82428	956.322
6.82419	940.019
6.82411	923.717
6.82403	907.415
6.85387	891.113
6.84949	870.735
6.83663	862.584
6.87963	915.566
6.87931	851.716
6.90516	891.113
6.90078	870.735
6.91383	915.566
6.9306	850.357
6.95636	874.81
6.95186	829.979
6.97761	850.357
7.0077	882.962
7.00332	862.584
7.00745	834.055
7.00307	813.677
6.99021	805.526
7.03289	793.299
7.05463	866.659
7.05455	850.357
7.05447	834.055
7.05438	817.753
7.08422	801.45
7.06706	789.224
7.10999	825.904
7.10974	776.997
7.13584	866.659
7.13146	846.282
7.13551	801.45
7.13527	753.902
7.15699	821.828
7.16104	778.355
7.18251	797.375
7.20805	776.997
7.20797	760.695
7.23376	789.224
7.2378	744.392
7.23343	724.015
7.2593	768.846
7.28503	785.148
7.28486	752.544
7.28478	736.241
7.31059	768.846
7.3364	801.45
7.33632	785.148
7.33615	752.544
7.33607	736.241
7.336	721.977
7.36186	764.77
7.36159	711.788
7.3874	744.392
7.38732	728.09
7.41313	760.695
7.4129	715.864
7.44297	744.392
7.43859	724.015
7.46454	785.148
7.46446	768.846
7.49027	801.45
7.49002	752.544
7.48994	736.241
7.48986	719.939
7.48978	703.637
7.48969	687.335
7.48962	673.07
7.50301	785.148
7.50293	768.846
7.52849	752.544
7.54123	736.241
7.54115	719.939
7.54107	703.637
7.54099	687.335
7.5281	675.108
7.59269	768.846
7.5926	752.544
7.59252	736.241
7.59244	719.939
7.57954	703.637
7.57947	691.41
7.64381	736.241
7.64373	719.939
7.64365	703.637
7.66962	768.846
7.66954	752.544
7.6951	736.241
7.69503	721.977
7.74656	768.846
7.74648	752.544
7.74639	736.241
7.74631	719.939
7.73343	707.712
7.77226	781.073
7.79781	760.695
7.79773	744.392
7.79764	728.09
7.79757	713.826
7.82362	793.299
7.82353	776.997
7.85337	760.695
7.84899	740.317
7.84891	724.015
7.84883	707.712
7.83597	699.561
7.87914	785.148
7.90507	842.206
7.9007	821.828
7.90061	805.526
7.90041	764.77
7.88748	744.392
7.8874	728.09
7.92618	789.224
7.95209	842.206
7.95201	825.904
7.95193	809.601
7.98209	858.508
8.00761	834.055
8.00325	815.715
7.99037	805.526
8.02927	891.113
8.02919	874.81
8.02911	858.508
8.055	907.415
8.05467	842.206
8.08508	940.019
8.08071	919.642
8.06774	891.113
8.06766	874.81
8.06758	858.508
8.11093	980.775
8.10656	960.397
8.09345	903.339
8.13211	942.057
8.11921	927.793
8.15799	988.926
8.15791	972.624
8.15783	956.322
8.18824	1054.14
8.18386	1033.76
8.18378	1017.46
8.1837	1001.15
8.20973	1078.59
8.19644	984.851
8.2353	1062.29
8.23521	1045.98
8.23514	1031.72
8.22225	1017.46
8.26111	1094.89
8.26102	1078.59
8.29127	1143.8
8.2869	1123.42
8.28681	1107.12
8.27376	1062.29
8.27368	1045.98
8.31712	1184.55
8.31275	1164.18
8.29953	1086.74
8.36455	1266.06
8.36447	1249.76
8.36439	1233.46
8.3643	1217.16
8.36422	1200.86
8.36414	1184.55
8.36406	1168.25
8.35117	1156.02
8.39028	1282.37
8.41598	1294.59
8.42011	1266.06
8.41574	1245.69
8.41566	1229.38
8.41557	1213.08
8.41551	1200.86
8.46721	1282.37
8.46713	1266.06
8.46705	1249.76
8.46697	1233.46
8.45406	1217.16
8.454	1204.93
8.52319	1363.88
8.51881	1343.5
8.51873	1327.2
8.51865	1310.9
8.51857	1294.59
8.51848	1278.29
8.5184	1261.99
8.51833	1247.72
8.57448	1363.88
8.5701	1343.5
8.57002	1327.2
8.56994	1310.9
8.55705	1298.67
8.55699	1286.44
8.59614	1420.94
8.59606	1404.63
8.59597	1388.33
8.62184	1433.16
8.62581	1372.03
8.62143	1351.65
8.60855	1339.42
8.60847	1323.12
8.64739	1412.78
8.6473	1396.48
8.67287	1380.18
8.6728	1365.92
8.6599	1351.65
8.69901	1477.99
8.69892	1461.69
8.69884	1445.39
8.69876	1429.09
8.69869	1414.82
8.68577	1396.48
8.72934	1559.5
8.72496	1539.13
8.72488	1522.82
8.7248	1506.52
8.72472	1492.26
8.75519	1600.26
8.75081	1579.88
8.7817	1771.43
8.77732	1751.06
8.77724	1734.75
8.77715	1718.45
8.77707	1702.15
8.77699	1685.85
8.77691	1669.54
8.77683	1653.24
8.77674	1636.94
8.77666	1620.64
8.80335	1828.49
8.80327	1812.19
8.80319	1795.89
8.7894	1604.34
8.83393	1958.91
8.82955	1938.53
8.82947	1922.23
8.82939	1905.93
8.82931	1889.63
8.82923	1873.32
8.82914	1857.02
8.82907	1842.76
8.81595	1783.66
8.86044	2130.08
8.85606	2109.71
8.85598	2093.4
8.8559	2077.1
8.85582	2060.8
8.85573	2044.5
8.85565	2028.19
8.85557	2011.89
8.85549	1995.59
8.85541	1979.29
8.88645	2203.44
8.88208	2183.07
8.882	2166.76
8.88191	2150.46
8.90844	2325.71
8.90836	2309.41
8.90828	2293.11
8.9082	2276.8
8.90811	2260.5
8.90803	2244.2
8.90795	2227.9
8.93351	2211.59
8.93343	2195.29
8.93335	2178.99
8.93327	2162.69
8.93318	2146.39
8.9331	2130.08
8.93302	2113.78
8.93295	2099.52
8.94666	2276.8
8.94658	2260.5
8.9465	2244.2
8.94642	2227.9
8.96277	2081.18
8.9584	2060.8
8.95831	2044.5
8.95823	2028.19
8.95815	2011.89
8.95807	1995.59
8.95799	1979.29
8.9579	1962.99
8.95782	1946.68
8.95774	1930.38
8.98756	1910
8.98318	1889.63
8.9831	1873.32
8.98301	1857.02
8.98293	1840.72
8.98285	1824.42
8.98277	1808.11
8.98269	1791.81
8.9826	1775.51
8.96974	1767.36
9.00815	1755.13
9.00806	1738.83
9.00798	1722.53
9.0079	1706.22
9.00782	1689.92
9.00774	1673.62
9.00765	1657.32
9.03322	1641.02
9.03313	1624.71
9.03305	1608.41
9.03297	1592.11
9.03289	1575.81
9.03281	1559.5
9.03272	1543.2
9.03264	1526.9
9.03257	1512.64
9.0624	1494.3
9.04524	1482.07
9.07115	1535.05
9.07107	1518.75
9.08364	1469.84
9.08356	1453.54
9.08349	1439.28
9.09655	1486.14
9.11332	1420.94
9.10894	1400.56
9.12199	1445.39
9.13448	1380.18
9.13441	1365.92
9.14747	1412.78
9.16021	1396.48
9.15998	1351.65
9.18577	1380.18
9.18569	1363.88
9.19868	1396.48
9.21125	1347.58
9.21117	1331.27
9.21109	1314.97
9.21102	1300.71
9.22416	1363.88
9.23659	1286.44
9.26665	1314.97
9.26228	1294.59
9.31371	1323.12
9.31363	1306.82
9.31355	1290.52
9.31348	1278.29
9.33944	1339.42
9.365	1323.12
9.36492	1306.82
9.36484	1290.52
9.36475	1274.22
9.36467	1257.91
9.37791	1339.42
9.41619	1302.74
9.41611	1286.44
9.41603	1272.18
9.46746	1298.67
9.46738	1282.37
9.46729	1266.06
9.46721	1249.76
9.46713	1233.46
9.46705	1217.16
9.46697	1200.86
9.4669	1188.63
9.51875	1298.67
9.51867	1282.37
9.51858	1266.06
9.57008	1306.82
9.57	1290.52
9.56992	1274.22
9.56984	1259.95
9.5954	1241.61
9.59531	1225.31
9.59523	1209.01
9.62143	1319.05
9.62135	1302.74
9.62127	1286.44
9.62119	1270.14
9.6211	1253.84
9.60799	1196.78
9.64665	1233.46
9.67673	1266.06
9.67235	1245.69
9.67648	1217.16
9.67211	1196.78
9.67202	1180.48
9.67194	1164.18
9.72375	1266.06
9.72366	1249.76
9.72358	1233.46
9.7235	1217.16
9.72342	1200.86
9.72335	1186.59
9.74892	1172.33
9.77514	1286.44
9.77506	1270.14
9.77498	1253.84
9.77489	1237.54
9.77481	1221.23
9.77474	1206.97
9.76184	1192.7
9.82627	1253.84
9.82618	1237.54
9.8261	1221.23
9.82602	1204.93
9.82594	1188.63
9.81307	1180.48
9.85148	1168.25
9.8514	1151.95
9.85133	1137.68
9.87737	1217.16
9.87729	1200.86
9.87721	1184.55
9.90332	1278.29
9.90324	1261.99
9.90316	1245.69
9.90308	1229.38
9.90704	1168.25
9.90267	1147.87
9.8898	1139.72
9.93289	1209.01
9.92852	1188.63
9.95875	1249.76
9.95437	1229.38
9.95408	1172.33
9.94116	1151.95
9.94109	1139.72
9.98418	1209.01
9.97981	1188.63
10.0058	1266.06
10.0058	1249.76
10.0057	1233.46
10.0053	1168.25
9.99247	1156.02
10.0312	1217.16
10.0312	1200.86
10.0311	1184.55
10.0572	1282.37
10.0571	1266.06
10.0571	1249.76
10.057	1233.46
10.0566	1168.25
10.0825	1217.16
10.0824	1200.86
10.0824	1184.55
10.0822	1153.99
10.0956	1266.06
10.0955	1249.76
10.1083	1233.46
10.1079	1168.25
10.1381	1217.16
10.1337	1196.78
10.1336	1180.48
10.1335	1158.06
10.1468	1241.61
10.1723	1209.01
10.185	1192.7
10.1849	1176.4
10.1848	1160.1
10.2147	1143.8
10.2103	1123.42
10.2102	1107.12
10.1973	1098.97
10.2365	1233.46
10.2364	1217.16
10.2363	1200.86
10.2362	1184.55
10.2233	1168.25
10.2623	1261.99
10.2622	1245.69
10.292	1225.31
10.2876	1204.93
10.2875	1188.63
10.2875	1172.33
10.313	1151.95
10.3392	1249.76
10.3391	1233.46
10.339	1217.16
10.3389	1200.86
10.3388	1184.55
10.3387	1168.25
10.3386	1135.65
10.3385	1121.38
10.3515	1151.95
10.3903	1221.23
10.3902	1204.93
10.3901	1188.63
10.3773	1180.48
10.4157	1168.25
10.4156	1151.95
10.4155	1139.72
10.4458	1217.16
10.4415	1196.78
10.4414	1180.48
10.4669	1160.1
10.4668	1143.8
10.4668	1127.5
10.4667	1111.19
10.4666	1094.89
10.48	1209.01
10.4927	1192.7
10.4926	1176.4
10.4794	1082.66
10.5182	1160.1
10.5181	1143.8
10.5181	1127.5
10.518	1111.19
10.5312	1192.7
10.5311	1176.4
10.5478	1096.25
10.5694	1131.57
10.5693	1115.27
10.5991	1094.89
10.5947	1074.51
10.5946	1058.21
10.5945	1041.91
10.6201	1021.53
10.62	1005.23
10.6199	988.926
10.6199	974.662
10.633	1037.83
10.6497	956.322
10.6325	944.095
10.6713	997.077
10.6712	980.775
10.6709	931.868
10.6708	915.566
10.6708	899.264
10.6839	964.473
10.6838	948.171
10.6963	882.962
10.6962	866.659
10.6962	850.357
10.6961	834.055
10.696	821.828
10.7347	858.508
10.7474	842.206
10.7473	825.904
10.7472	809.601
10.7472	793.299
10.7471	776.997
10.7769	760.695
10.7726	740.317
10.7725	724.015
10.7724	709.75
10.7858	817.753
10.7857	801.45
10.7856	785.148
10.8239	748.468
10.8238	732.166
10.8237	715.864
10.8493	695.486
10.8492	679.183
10.8491	662.881
10.849	648.617
10.8622	728.09
10.875	707.712
10.8877	687.335
10.8876	671.032
10.9003	650.655
10.9002	634.352
10.8874	626.201
10.9258	613.975
10.9257	599.71
10.9515	630.277
10.9642	613.975
10.9642	597.672
10.9769	581.37
10.9768	565.068
10.9768	550.803
11.0066	532.463
11.0022	516.161
11.0152	556.917
11.0536	540.614
11.0536	524.312
11.0535	508.01
11.0534	493.745
11.079	477.443
11.1047	503.934
11.1047	487.632
11.1345	467.254
11.1173	455.028
11.1432	491.708
11.1557	442.801
11.1815	471.33
11.1814	455.028
11.207	434.65
11.2069	418.348
11.2068	406.121
11.2454	434.65
11.2582	418.348
11.2581	402.045
11.258	385.743
11.2579	371.479
11.3137	410.196
11.3093	389.819
11.3093	377.592
11.3352	434.65
11.3608	418.348
11.3607	402.045
11.3606	385.743
11.3605	371.479
11.3992	402.045
11.4119	385.743
11.4118	369.441
11.4117	357.214
11.4633	406.121
11.4632	389.819
11.4631	373.516
11.463	357.214
11.463	340.912
11.4501	332.761
11.5145	402.045
11.5145	385.743
11.5144	369.441
11.5143	353.139
11.5142	336.836
11.527	324.61
11.5658	393.894
11.5657	377.592
11.5656	361.29
11.5656	344.987
11.5911	328.685
11.591	314.421
11.6169	357.214
11.6168	340.912
11.6424	320.534
11.6683	385.743
11.6683	369.441
11.6682	353.139
11.6681	336.836
11.6937	328.685
11.7195	361.29
11.7194	344.987
11.7452	377.592
11.745	332.761
11.7708	357.214
11.7707	340.912
11.7963	324.61
11.8221	369.441
11.8221	353.139
11.822	336.836
11.8475	320.534
11.8733	353.139
11.8733	336.836
11.8603	308.307
11.8988	320.534
11.9289	353.139
11.9245	332.761
11.9501	314.421
11.9631	361.29
11.9759	344.987
11.9758	328.685
12.0014	312.383
12.0272	340.912
12.0271	324.61
12.0312	296.081
12.0656	336.836
12.0783	316.459
12.0782	300.156
12.0654	292.005
12.1296	308.307
12.1295	292.005
12.1294	279.778
12.1852	312.383
12.1808	292.005
12.1679	279.778
12.2322	316.459
12.2321	300.156
12.232	285.892
12.2706	312.383
12.2834	296.081
12.2833	281.816
12.3089	265.514
12.3346	279.778
12.3644	264.835
12.386	304.232
12.3859	287.93
12.4115	275.703
12.4373	300.156
12.4372	283.854
12.4627	263.476
12.4757	296.081
12.4885	279.778
12.4883	247.174
12.4882	234.947
12.514	263.476
12.5397	275.703
12.5439	248.533
12.5953	279.778
12.5909	259.401
12.5908	243.098
12.6423	267.552
12.6422	251.25
12.6421	234.947
12.642	222.721
12.6977	247.174
12.6806	230.872
12.6805	218.645
12.7449	279.778
12.7448	263.476
12.7447	247.174
12.7447	232.91
12.7703	218.645
12.8004	263.476
12.796	243.098
12.7959	226.796
12.8215	214.57
12.8475	279.778
12.8474	263.476
12.8473	247.174
12.8344	230.872
12.8987	271.627
12.8987	255.325
12.8986	241.061
12.9242	228.834
12.95	275.703
12.95	259.401
12.9499	243.098
12.9755	230.872
13.0013	263.476
13.0012	247.174
13.0268	239.023
13.0569	271.627
13.0525	251.25
13.0653	234.947
13.1082	271.627
13.091	255.325
13.1553	287.93
13.1552	271.627
13.1551	255.325
13.155	241.061
13.1678	226.796
13.2066	287.93
13.2065	271.627
13.2064	255.325
13.1935	239.023
13.258	320.534
13.2579	304.232
13.245	287.93
13.2449	271.627
13.3137	344.987
13.3093	324.61
13.3093	310.345
13.3608	353.139
13.3607	336.836
13.3606	320.534
13.3477	308.307
13.3865	369.441
13.4163	353.139
13.4119	332.761
13.3991	324.61
13.4421	377.592
13.4375	316.459
13.4679	402.045
13.4505	353.139
13.4504	336.836
13.4934	377.592
13.4762	365.365
13.515	418.348
13.5149	402.045
13.5447	385.743
13.5403	365.365
13.5706	426.499
13.5662	406.121
13.5789	385.743
13.5788	369.441
13.6219	442.801
13.6176	422.423
13.6175	408.159
13.6435	479.481
13.6434	463.179
13.669	442.801
13.6689	428.536
13.6948	471.33
13.6947	455.028
13.6987	410.196
13.7202	434.65
13.75	418.348
13.7457	397.97
13.7587	442.801
13.7712	377.592
13.7711	361.29
13.7711	344.987
13.8013	410.196
13.7969	389.819
13.8267	369.441
13.8355	410.196
13.8354	393.894
13.8523	344.987
13.8351	332.761
13.878	369.441
13.8993	344.987
13.8992	332.761
13.9294	393.894
13.9251	373.516
13.925	357.214
13.9505	342.95
13.9635	377.592
13.9763	361.29
13.9761	328.685
13.9761	316.459
14.0018	344.987
14.0276	361.29
14.0274	328.685
14.0531	344.987
14.053	312.383
14.0789	361.29
14.0787	328.685
14.0786	300.156
14.1044	344.987
14.1043	312.383
14.1301	357.214
14.1343	328.685
14.1598	306.949
14.1814	344.987
14.1813	328.685
14.2111	312.383
14.2369	336.836
14.2324	296.081
14.2581	312.383
14.2881	328.685
14.3094	310.345
14.3352	344.987
14.3352	328.685
14.365	312.383
14.3478	300.156
14.3737	336.836
14.3862	287.93
14.4121	320.534
14.412	304.232
14.399	275.703
14.4378	336.836
14.4247	287.93
14.4678	353.139
14.4676	320.534
14.5149	369.441
14.5148	353.139
14.5147	336.836
14.5146	320.534
14.5146	306.27
14.5662	365.365
14.5661	349.063
14.566	332.761
14.5659	316.459
14.553	304.232
14.6174	361.29
14.6173	344.987
14.6173	330.723
14.6044	312.383
14.6043	300.156
14.6432	377.592
14.673	361.29
14.6988	385.743
14.72	365.365
14.7501	402.045
14.7457	381.668
14.7713	363.327
14.7843	393.894
14.797	377.592
14.7968	344.987
14.8269	362.648
14.8485	418.348
14.8484	402.045
14.8483	385.743
14.8742	430.574
14.8782	369.441
14.861	357.214
14.904	410.196
14.8997	389.819
14.9298	434.65
14.9124	373.516
14.9511	410.196
14.951	397.97
14.9813	475.405
14.9769	455.028
14.9768	438.725
14.9768	422.423
15.0066	402.045
14.9894	389.819
15.0284	491.708
15.0283	475.405
15.0282	459.103
15.0282	442.801
15.0281	426.499
15.0797	483.557
15.0796	467.254
15.0795	452.99
15.131	503.934
15.131	487.632
15.1309	471.33
15.1308	455.028
15.1307	438.725
15.1179	430.574
15.1867	516.161
15.1823	495.783
15.1822	479.481
15.1693	467.254
15.1692	450.952
15.1692	438.725
15.2124	540.614
15.238	517.52
15.2208	499.859
15.2207	483.557
15.2206	471.33
15.2596	569.143
15.2595	552.841
15.2466	540.614
15.3152	581.37
15.3109	560.992
15.298	552.841
15.3364	540.614
15.3667	622.126
15.3623	601.748
15.3623	585.446
15.3494	573.219
15.3493	556.917
15.4182	662.881
15.4138	642.503
15.4138	626.201
15.4009	613.975
15.4008	597.672
15.4654	695.486
15.4653	679.183
15.4652	662.881
15.4652	650.655
15.5211	728.09
15.5168	707.712
15.5167	691.41
15.5166	675.108
15.5037	666.957
15.5428	785.148
15.5427	768.846
15.5426	752.544
15.5728	801.45
15.5682	744.392
15.5985	825.904
15.5812	776.997
15.5811	760.695
15.6201	866.659
15.6201	850.357
15.607	801.45
15.6069	789.224
15.6459	899.264
15.6459	882.962
15.6328	834.055
15.6327	817.753
15.6718	948.171
15.6717	931.868
15.6717	915.566
15.6586	866.659
15.7015	899.264
15.6843	882.962
15.7235	1021.53
15.7234	1005.23
15.7233	988.926
15.7233	972.624
15.7232	956.322
15.7231	940.019
15.7102	923.717
15.7749	1045.98
15.7748	1029.68
15.7747	1013.38
15.7618	997.077
15.7618	984.851
15.8267	1135.65
15.8266	1119.34
15.8265	1103.04
15.8264	1086.74
15.8263	1070.44
15.8262	1054.14
15.8262	1039.87
15.8133	1025.61
15.8651	1135.65
15.8779	1119.34
15.8778	1103.04
15.8777	1086.74
15.8776	1070.44
15.8775	1054.14
15.8774	1037.83
15.929	1086.74
15.9289	1070.44
15.9288	1054.14
15.9287	1037.83
15.9543	1023.57
15.9674	1086.74
15.9802	1066.36
15.9801	1050.06
15.98	1033.76
15.9841	1005.23
15.9798	984.851
15.9669	976.699
16.0314	1058.21
16.0313	1041.91
16.0313	1025.61
16.0312	1009.3
16.0311	993.002
16.031	976.699
16.0309	962.435
16.0827	1062.29
16.0827	1045.98
16.0826	1029.68
16.0825	1013.38
16.0824	997.077
16.0823	980.775
16.1079	966.511
16.1212	1062.29
16.1211	1045.98
16.1338	1025.61
16.1337	1009.3
16.1337	993.002
16.1336	976.699
[truncated: 3,575 more rows]

## Sheet: SG-04-Heated
2Theta	Counts (I)
3.19139	2303.61
3.1913	2288.45
3.19121	2273.28
3.19112	2258.12
3.19103	2242.96
3.19094	2227.79
3.19085	2212.63
3.19076	2197.46
3.19068	2182.3
3.17781	2174.72
3.22048	2163.34
3.2161	2144.39
3.22952	2246.75
3.22943	2231.58
3.22934	2216.42
3.24206	2197.46
3.24197	2182.3
3.24591	2125.43
3.22874	2114.06
3.2675	2163.34
3.26741	2148.18
3.2933	2189.88
3.29321	2174.72
3.29724	2133.02
3.29285	2114.06
3.29277	2098.9
3.29268	2083.73
3.29259	2068.57
3.2925	2053.4
3.29241	2038.24
3.29232	2023.08
3.30592	2155.76
3.34379	2053.4
3.3437	2038.24
3.34361	2023.08
3.34352	2007.91
3.34343	1992.75
3.34335	1979.48
3.39541	2110.27
3.39532	2095.11
3.39524	2079.94
3.39515	2064.78
3.39506	2049.61
3.39497	2034.45
3.39488	2019.28
3.39479	2004.12
3.3947	1988.96
3.39462	1975.69
3.42017	1958.63
3.44615	2015.49
3.44606	2000.33
3.44597	1985.17
3.44588	1970
3.45	1943.46
3.44561	1924.51
3.44552	1909.34
3.44543	1894.18
3.44534	1879.02
3.44525	1863.85
3.44517	1848.69
3.44508	1833.52
3.44499	1818.36
3.4449	1803.2
3.47043	1784.24
3.47034	1769.08
3.45745	1757.7
3.49697	1935.88
3.49688	1920.72
3.49679	1905.55
3.4967	1890.39
3.49661	1875.23
3.49652	1860.06
3.49643	1844.9
3.49634	1829.73
3.49625	1814.57
3.49617	1799.4
3.52295	1992.75
3.52286	1977.58
3.52277	1962.42
3.52268	1947.26
3.526	1785.5
3.53539	1928.3
3.54813	1913.14
3.54804	1897.97
3.54795	1882.81
3.54786	1867.64
3.54777	1852.48
3.54768	1837.32
3.54759	1822.15
3.5475	1806.99
3.57733	1791.82
3.56017	1780.45
3.58628	1860.06
3.58619	1844.9
3.5989	1825.94
3.59881	1810.78
3.60284	1769.08
3.59846	1750.12
3.59837	1734.96
3.59828	1719.79
3.59819	1704.63
3.59811	1691.36
3.62435	1791.82
3.63726	1806.99
3.63708	1776.66
3.64979	1757.7
3.6497	1742.54
3.64961	1727.38
3.64952	1712.21
3.66226	1697.05
3.70106	1753.91
3.70097	1738.75
3.70088	1723.58
3.70079	1708.42
3.73062	1693.26
3.72624	1674.3
3.72615	1659.14
3.71328	1651.55
3.75231	1746.33
3.75222	1731.17
3.75213	1716
3.76486	1700.84
3.77757	1681.88
3.77748	1666.72
3.77739	1651.55
3.7773	1636.39
3.77721	1621.23
3.77713	1606.06
3.77704	1590.9
3.77695	1575.73
3.77686	1560.57
3.77677	1545.41
3.77668	1530.24
3.77659	1515.08
3.76372	1507.5
3.81584	1647.76
3.81575	1632.6
3.82846	1613.64
3.82837	1598.48
3.82828	1583.32
3.82819	1568.15
3.8281	1552.99
3.82801	1537.82
3.85358	1524.56
3.86686	1602.27
3.86677	1587.11
3.87948	1568.15
3.87939	1552.99
3.87931	1537.82
3.90484	1518.87
3.90475	1503.7
3.90468	1492.33
3.93064	1545.41
3.93055	1530.24
3.95606	1507.5
3.95597	1492.33
3.95588	1477.17
3.95579	1462
3.95571	1446.84
3.94284	1439.26
4.0116	1503.7
4.00722	1484.75
4.00713	1469.59
4.00704	1454.42
4.00695	1439.26
4.00686	1424.09
3.99399	1416.51
4.0324	1405.14
4.01951	1393.76
4.04584	1511.29
4.04575	1496.12
4.04566	1480.96
4.04558	1465.79
4.05831	1450.63
4.05822	1435.47
4.05813	1420.3
4.08369	1405.14
4.0836	1389.97
4.08351	1374.81
4.0966	1420.3
4.10906	1359.65
4.09617	1348.27
4.13498	1405.14
4.13489	1389.97
4.1348	1374.81
4.16499	1420.3
4.16463	1359.65
4.1734	1397.56
4.17331	1382.39
4.18587	1336.9
4.18578	1321.73
4.18569	1306.57
4.18561	1293.3
4.21167	1363.44
4.21158	1348.27
4.21543	1276.24
4.21106	1261.08
4.24139	1329.32
4.237	1310.36
4.23691	1295.2
4.25016	1367.23
4.25007	1352.06
4.26244	1276.24
4.26236	1261.08
4.26227	1245.91
4.26218	1230.75
4.26209	1215.59
4.262	1200.42
4.27553	1321.73
4.28825	1302.78
4.28816	1287.62
4.2876	1192.84
4.31796	1268.66
4.31358	1249.71
4.31349	1234.54
4.31341	1221.27
4.30051	1208
4.33947	1291.41
4.36503	1276.24
4.36494	1261.08
4.36485	1245.91
4.36476	1230.75
4.36467	1215.59
4.36459	1202.32
4.39441	1185.26
4.37725	1173.88
4.40345	1268.66
4.40336	1253.5
4.41607	1234.54
4.41598	1219.38
4.41589	1204.21
4.41993	1163.78
4.40276	1151.14
4.44143	1185.26
4.46732	1226.96
4.46723	1211.8
4.46714	1196.63
4.47126	1170.09
4.45409	1158.72
4.49249	1147.35
4.51856	1219.38
4.51847	1204.21
4.51838	1189.05
4.51829	1173.88
4.51821	1158.72
4.51808	1137.87
4.54792	1124.6
4.54354	1105.65
4.57388	1177.68
4.5695	1158.72
4.56941	1143.56
4.57335	1087.95
4.55618	1075.32
4.59921	1124.6
4.59483	1105.65
4.62079	1158.72
4.6207	1143.56
4.62464	1086.69
4.65051	1124.6
4.64612	1105.65
4.65015	1063.94
4.67165	1086.69
4.68474	1132.18
4.69745	1113.23
4.69737	1098.06
4.70148	1071.53
4.6971	1052.57
4.69701	1037.41
4.69692	1022.24
4.69683	1007.08
4.69674	991.915
4.69666	978.647
4.74872	1109.44
4.74863	1094.27
4.74854	1079.11
4.74845	1063.94
4.74838	1050.68
4.73545	1033.62
4.78715	1101.86
4.79986	1082.9
4.79977	1067.74
4.79968	1052.57
4.82521	1033.62
4.82512	1018.45
4.85531	1063.94
4.85092	1044.99
4.85495	1003.29
4.85057	984.333
4.85049	971.065
4.83761	961.587
4.87681	1086.69
4.87646	1026.03
4.88955	1071.53
4.88946	1056.36
4.88937	1041.2
4.90201	1010.87
4.90192	995.706
4.90184	980.542
4.90176	967.273
4.95342	1029.83
4.95333	1014.66
4.95324	999.497
4.95315	984.333
4.95306	969.169
4.95298	955.9
5.00464	1018.45
5.00455	1003.29
5.00446	988.124
5.00437	972.96
5.00428	957.796
5.0042	944.527
5.03402	927.468
5.01686	916.095
5.06007	995.706
5.05568	976.751
5.0556	961.587
5.05551	946.423
5.08531	927.468
5.06815	916.095
5.09417	980.542
5.09409	965.378
5.094	950.214
5.10655	904.721
5.10646	889.557
5.10637	874.393
5.09348	863.02
5.13656	919.886
5.1578	897.139
5.14489	881.975
5.18789	927.468
5.18351	908.513
5.20904	889.557
5.20895	874.393
5.20888	861.125
5.23478	904.721
5.26461	889.557
5.26022	870.602
5.26013	855.438
5.26004	840.274
5.25997	827.005
5.28609	908.513
5.3159	889.557
5.31151	870.602
5.31142	855.438
5.31133	840.274
5.31124	825.11
5.31117	811.841
5.33738	908.513
5.36291	889.557
5.36282	874.393
5.36274	859.229
5.36265	844.065
5.36256	828.901
5.39292	904.721
5.38815	819.423
5.40134	881.975
5.41407	866.811
5.41398	851.647
5.41389	836.483
5.41371	806.155
5.41362	790.991
5.44372	821.319
5.46532	859.229
5.46523	844.065
5.46496	798.573
5.46487	783.408
5.49078	828.901
5.49069	813.737
5.51652	844.065
5.51625	798.573
5.51616	783.408
5.54207	828.901
5.54198	813.737
5.54172	768.244
5.54164	754.976
5.55499	844.065
5.55472	798.573
5.56745	783.408
5.59301	768.244
5.59292	753.08
5.59283	737.916
5.59274	722.752
5.61899	825.11
5.6189	809.946
5.61881	794.782
5.61872	779.617
5.64853	760.662
5.64414	741.707
5.64406	728.439
5.6744	798.573
5.67001	779.617
5.69554	760.662
5.69545	745.498
5.68254	730.334
5.72146	806.155
5.72137	790.991
5.72128	775.826
5.74683	760.662
5.74674	745.498
5.74666	730.334
5.77226	722.752
5.79817	768.244
5.79808	753.08
5.79799	737.916
5.82782	722.752
5.81063	707.588
5.84933	745.498
5.87488	730.334
5.87479	715.17
5.87473	703.797
5.90071	760.662
5.90062	745.498
5.92617	730.334
5.92608	715.17
5.92599	700.006
5.9259	684.842
5.95575	672.205
5.9816	707.588
5.97722	688.633
5.98995	673.469
6.02866	715.17
6.02857	700.006
6.0544	730.334
6.07993	711.379
6.07984	696.215
6.07975	681.051
6.07966	665.886
6.10522	650.722
6.13147	753.08
6.13138	737.916
6.13129	722.752
6.1312	707.588
6.13111	692.424
6.13102	677.26
6.11811	662.095
6.18258	722.752
6.18249	707.588
6.1824	692.424
6.18231	677.26
6.20787	662.095
6.20778	646.931
6.2077	633.663
6.23396	737.916
6.23387	722.752
6.23378	707.588
6.23369	692.424
6.2336	677.26
6.26343	662.095
6.25905	643.14
6.25896	627.976
6.24607	616.603
6.28921	684.842
6.31072	707.588
6.31047	665.886
6.33625	688.633
6.33616	673.469
6.36169	654.513
6.36161	639.349
6.38752	684.842
6.38743	669.678
6.41299	654.513
6.4129	639.349
6.41283	627.976
6.43872	669.678
6.46428	654.513
6.4642	641.245
6.4513	627.976
6.49001	669.678
6.52011	700.006
6.51572	681.051
6.51984	654.513
6.50268	643.14
6.54535	631.767
6.54097	612.812
6.5409	601.439
6.56703	684.842
6.56695	669.678
6.56686	654.513
6.59241	639.349
6.59232	624.185
6.62251	669.678
6.61812	650.722
6.62216	610.285
6.64399	688.633
6.64794	633.031
6.6567	669.678
6.66942	650.722
6.69495	631.767
6.69487	618.499
6.72068	646.931
6.74642	662.095
6.74624	631.767
6.77215	677.26
6.77197	646.931
6.7718	616.603
6.80198	662.095
6.80181	633.031
6.83622	669.678
6.84895	654.513
6.84886	639.349
6.84878	624.185
6.84869	609.021
6.8486	593.857
6.84851	578.693
6.84844	567.32
6.90033	669.678
6.90024	654.513
6.90016	639.349
6.90007	624.185
6.89998	609.021
6.92622	711.379
6.92613	696.215
6.92605	681.051
6.95156	658.304
6.95147	643.14
6.95138	627.976
6.95129	612.812
6.95121	599.543
7.003	684.842
7.00291	669.678
7.00283	654.513
7.00274	639.349
7.02834	631.767
7.05441	703.797
7.05432	688.633
7.05423	673.469
7.05414	658.304
7.05405	643.14
7.0796	627.976
7.10567	700.006
7.10558	684.842
7.1055	669.678
7.10542	656.409
7.09249	639.349
7.15701	707.588
7.15692	692.424
7.15683	677.26
7.15674	662.095
7.15666	648.827
7.18222	633.663
7.20819	688.633
7.2081	673.469
7.20801	658.304
7.20792	643.14
7.20781	624.185
7.25954	700.006
7.25946	684.842
7.25937	669.678
7.24645	654.513
7.24637	639.349
7.31524	722.752
7.31086	703.797
7.31077	688.633
7.31068	673.469
7.31061	662.095
7.36226	722.752
7.36217	707.588
7.36208	692.424
7.36199	677.26
7.3619	662.095
7.36181	646.931
7.34892	635.558
7.41386	775.826
7.41377	760.662
7.41368	745.498
7.41359	730.334
7.41351	715.17
7.41342	700.006
7.41333	684.842
7.40044	673.469
7.46943	775.826
7.46504	756.871
7.46495	741.707
7.46486	726.543
7.452	718.961
7.49467	707.588
7.47748	692.424
7.52072	775.826
7.51633	756.871
7.51624	741.707
7.51615	726.543
7.57201	775.826
7.56762	756.871
7.55473	745.498
7.55464	730.334
7.55458	718.961
7.5936	813.737
7.59351	798.573
7.62334	783.408
7.61896	764.453
7.60609	756.871
7.64449	745.498
7.64442	734.125
7.67486	821.319
7.67047	802.364
7.67038	787.199
7.65749	775.826
7.6574	760.662
7.72183	813.737
7.72174	798.573
7.72165	783.408
7.72157	770.14
7.77748	828.901
7.7731	809.946
7.76021	798.573
7.76012	783.408
7.76005	772.035
7.82886	844.065
7.82448	825.11
7.8244	811.841
7.81152	802.364
7.85046	881.975
7.85037	866.811
7.87626	908.513
7.87617	893.348
7.8631	851.647
7.9017	874.393
7.90163	863.02
7.92752	904.721
7.92744	889.557
7.95299	874.393
7.9529	859.229
7.97899	935.05
7.9789	919.886
7.97882	904.721
7.97874	891.453
7.96566	847.856
8.00909	965.378
8.00471	946.423
8.03496	1003.29
8.03057	984.333
8.05611	965.378
8.08227	1052.57
8.08218	1037.41
8.08209	1022.24
8.082	1007.08
8.08191	991.915
8.08183	978.647
8.13776	1041.2
8.13338	1022.24
8.13329	1007.08
8.13321	993.811
8.12031	980.542
8.12024	969.169
8.15945	1094.27
8.15936	1079.11
8.15927	1063.94
8.18484	1050.68
8.21501	1094.27
8.21063	1075.32
8.21055	1062.05
8.26265	1200.42
8.26256	1185.26
8.26247	1170.09
8.26238	1154.93
8.2623	1139.77
8.26221	1124.6
8.26212	1109.44
8.26204	1096.17
8.24912	1079.11
8.24903	1063.94
8.31813	1185.26
8.31374	1166.3
8.31366	1153.03
8.30076	1139.77
8.30067	1124.6
8.3399	1253.5
8.33981	1238.33
8.33972	1223.17
8.33963	1208
8.36991	1268.66
8.35237	1192.84
8.3523	1181.47
8.39542	1245.91
8.41728	1329.32
8.41719	1314.15
8.4171	1298.99
8.41701	1283.82
8.41694	1270.56
8.44756	1389.97
8.44317	1371.02
8.44308	1355.85
8.44299	1340.69
8.46933	1458.21
8.46924	1443.05
8.46915	1427.88
8.46906	1412.72
8.4557	1321.73
8.45562	1306.57
8.49506	1473.38
8.4818	1397.56
8.48171	1382.39
8.48162	1367.23
8.48155	1355.85
8.52507	1488.54
8.52064	1462
8.50771	1443.05
8.55139	1602.27
8.547	1583.32
8.54691	1568.15
8.54682	1552.99
8.54673	1537.82
8.54664	1522.66
8.54656	1507.5
8.57352	1731.17
8.57343	1716
8.57334	1700.84
8.57325	1685.67
8.57316	1670.51
8.57307	1655.35
8.57298	1640.18
8.57289	1625.02
8.59943	1776.66
8.59934	1761.49
8.59925	1746.33
8.58563	1609.85
8.58554	1594.69
8.58545	1579.53
8.58536	1564.36
8.58527	1549.2
8.62543	1837.32
8.62534	1822.15
8.62525	1806.99
8.62516	1791.82
8.65152	1913.14
8.65143	1897.97
8.65134	1882.81
8.65125	1867.64
8.65117	1852.48
8.68296	2170.93
8.67857	2151.97
8.67848	2136.81
8.67839	2121.64
8.6783	2106.48
8.67822	2091.31
8.67813	2076.15
8.67804	2060.99
8.67795	2045.82
8.67786	2030.66
8.67777	2015.49
8.67768	2000.33
8.67759	1985.17
8.6775	1970
8.67741	1954.84
8.67732	1939.67
8.67725	1926.4
8.70936	2299.82
8.70498	2280.87
8.70489	2265.7
8.7048	2250.54
8.70471	2235.37
8.70462	2220.21
8.70453	2205.05
8.70444	2189.88
8.73657	2565.19
8.73218	2546.24
8.73209	2531.07
8.732	2515.91
8.73191	2500.75
8.73183	2485.58
8.73174	2470.42
8.73165	2455.25
8.73156	2440.09
8.73147	2424.93
8.73138	2409.76
8.73129	2394.6
8.7312	2379.43
8.73111	2364.27
8.73102	2349.1
8.73093	2333.94
8.73084	2318.78
8.71715	2170.93
8.71706	2155.76
8.71697	2140.6
8.71688	2125.43
8.7168	2110.27
8.71673	2098.9
8.76297	2694.09
8.75859	2675.13
8.7585	2659.97
8.75841	2644.8
8.75832	2629.64
8.75823	2614.48
8.75814	2599.31
8.75805	2584.15
8.74356	2299.82
8.79134	3156.59
8.78695	3137.64
8.78686	3122.47
8.78677	3107.31
8.78668	3092.15
8.78659	3076.98
8.78651	3061.82
8.78642	3046.65
8.78633	3031.49
8.78624	3016.33
8.78615	3001.16
8.78606	2986
8.78597	2970.83
8.78588	2955.67
8.78579	2940.51
8.7857	2925.34
8.78561	2910.18
8.78552	2895.01
8.78544	2879.85
8.78535	2864.68
8.78526	2849.52
8.78517	2834.36
8.78508	2819.19
8.78499	2804.03
8.7849	2788.86
8.78481	2773.7
8.78472	2758.54
8.78463	2743.37
8.78454	2728.21
8.78445	2713.04
8.77076	2565.19
8.77067	2550.03
8.77058	2534.86
8.77049	2519.7
8.81534	3603.94
8.81525	3588.77
8.81516	3573.61
8.81507	3558.44
8.81498	3543.28
8.81489	3528.12
8.8148	3512.95
8.81472	3497.79
8.81463	3482.62
8.81454	3467.46
8.81445	3452.29
8.81436	3437.13
8.81427	3421.97
8.81418	3406.8
8.81409	3391.64
8.814	3376.47
8.81391	3361.31
8.81382	3346.15
8.81373	3330.98
8.81364	3315.82
8.81356	3300.65
8.81347	3285.49
8.81338	3270.33
8.81329	3255.16
8.8132	3240
8.81311	3224.83
8.81302	3209.67
8.81293	3194.5
8.81284	3179.34
8.84429	4165.01
8.8442	4149.84
8.84411	4134.68
8.84402	4119.52
8.84393	4104.35
8.84384	4089.19
8.84375	4074.02
8.84366	4058.86
8.84357	4043.7
8.84348	4028.53
8.84339	4013.37
8.8433	3998.2
8.84321	3983.04
8.84313	3967.87
8.84304	3952.71
8.84295	3937.55
8.84286	3922.38
8.84277	3907.22
8.84268	3892.05
8.84259	3876.89
8.8425	3861.73
8.84241	3846.56
8.84232	3831.4
8.84223	3816.23
8.84214	3801.07
8.84206	3785.91
8.84197	3770.74
8.84188	3755.58
8.84179	3740.41
8.8417	3725.25
8.84161	3710.08
8.84152	3694.92
8.84143	3679.76
8.84134	3664.59
8.84125	3649.43
8.84116	3634.26
8.84107	3619.1
8.8256	3167.97
8.87439	4923.21
8.8743	4908.05
8.87421	4892.89
8.87412	4877.72
8.87403	4862.56
8.87394	4847.39
8.87386	4832.23
8.87377	4817.07
8.87368	4801.9
8.87359	4786.74
8.8735	4771.57
8.87341	4756.41
8.87332	4741.25
8.87323	4726.08
8.87314	4710.92
8.87305	4695.75
8.87296	4680.59
8.87287	4665.42
8.87278	4650.26
8.8727	4635.1
8.87261	4619.93
8.87252	4604.77
8.87243	4589.6
8.87234	4574.44
8.87225	4559.28
8.87216	4544.11
8.87207	4528.95
8.87198	4513.78
8.87189	4498.62
8.8718	4483.46
8.87171	4468.29
8.87163	4453.13
8.87154	4437.96
8.87145	4422.8
8.87136	4407.63
8.87127	4392.47
8.87118	4377.31
8.87109	4362.14
8.871	4346.98
8.87091	4331.81
8.87082	4316.65
8.87073	4301.49
8.87064	4286.32
8.87055	4271.16
8.87047	4255.99
8.87038	4240.83
8.87029	4225.67
8.8702	4210.5
8.87011	4195.34
8.87002	4180.17
8.90645	5287.15
8.90207	5268.2
8.90198	5253.03
8.90189	5237.87
8.9018	5222.71
8.90171	5207.54
8.90162	5192.38
8.90153	5177.21
8.90144	5162.05
8.90135	5146.89
8.90126	5131.72
8.90117	5116.56
8.90108	5101.39
8.90099	5086.23
8.90091	5071.07
8.90082	5055.9
8.90073	5040.74
8.90064	5025.57
8.90055	5010.41
8.90046	4995.24
8.90037	4980.08
8.90028	4964.92
8.90019	4949.75
8.90011	4936.48
8.93651	6037.78
8.93213	6018.82
8.93204	6003.66
8.93195	5988.49
8.93186	5973.33
8.93177	5958.17
8.93168	5943
8.93159	5927.84
8.9315	5912.67
8.93141	5897.51
8.93132	5882.35
8.93123	5867.18
8.93114	5852.02
8.93106	5836.85
8.93097	5821.69
8.93088	5806.53
8.93079	5791.36
8.9307	5776.2
8.93061	5761.03
8.93052	5745.87
8.93043	5730.7
8.93034	5715.54
8.93025	5700.38
8.93016	5685.21
8.93007	5670.05
8.92998	5654.88
8.9299	5639.72
8.92981	5624.56
8.92972	5609.39
8.92963	5594.23
8.92954	5579.06
8.92945	5563.9
8.92936	5548.74
8.92927	5533.57
8.92918	5518.41
8.92909	5503.24
8.929	5488.08
8.92891	5472.91
8.92883	5457.75
8.92874	5442.59
8.92865	5427.42
8.92856	5412.26
8.92847	5397.09
8.92838	5381.93
8.92829	5366.77
8.9282	5351.6
8.92811	5336.44
8.92802	5321.27
8.92793	5306.11
8.95906	6238.7
8.95898	6223.54
8.95889	6208.37
8.9588	6193.21
8.95871	6178.05
8.95862	6162.88
8.95853	6147.72
8.95844	6132.55
8.95835	6117.39
8.95826	6102.23
8.95817	6087.06
8.95808	6071.9
8.95799	6056.73
8.98353	6037.78
8.98344	6022.61
8.98335	6007.45
8.98326	5992.29
8.99715	6174.26
8.99706	6159.09
8.99697	6143.93
8.99689	6128.76
8.9968	6113.6
8.99671	6098.43
8.99662	6083.27
8.99653	6068.11
8.99644	6052.94
9.00882	5977.12
9.00873	5961.96
9.00864	5946.79
9.00855	5931.63
9.00846	5916.47
9.00837	5901.3
9.00828	5886.14
9.00819	5870.97
9.0081	5855.81
9.00801	5840.64
9.00792	5825.48
9.00783	5810.32
9.00775	5795.15
9.00766	5779.99
9.00757	5764.82
9.00748	5749.66
9.00739	5734.5
9.0073	5719.33
9.00721	5704.17
9.00712	5689
9.00703	5673.84
9.00694	5658.67
9.00685	5643.51
9.00676	5628.35
9.00668	5613.18
9.00659	5598.02
9.0065	5582.85
9.00641	5567.69
9.00632	5552.53
9.00623	5537.36
9.00614	5522.2
9.00605	5507.03
9.00596	5491.87
9.00587	5476.71
9.00578	5461.54
9.00569	5446.38
9.0056	5431.21
9.00552	5416.05
9.00543	5400.88
9.00534	5385.72
9.00525	5370.56
9.00516	5355.39
9.00507	5340.23
9.00498	5325.06
9.00489	5309.9
9.0048	5294.74
9.00471	5279.57
9.00462	5264.41
9.00453	5249.24
9.00445	5234.08
9.00436	5218.92
9.00427	5203.75
9.00418	5188.59
9.00409	5173.42
9.004	5158.26
9.00391	5143.09
9.00382	5127.93
9.02938	5112.77
9.02929	5097.6
9.0292	5082.44
9.02911	5067.27
9.02902	5052.11
9.02893	5036.95
9.02884	5021.78
9.02875	5006.62
9.02866	4991.45
9.02857	4976.29
9.02848	4961.13
9.0284	4945.96
9.02831	4930.8
9.02822	4915.63
9.02813	4900.47
9.02804	4885.3
9.02795	4870.14
9.02786	4854.98
9.02777	4839.81
9.02768	4824.65
9.02759	4809.48
9.0275	4794.32
9.05306	4779.16
9.05297	4763.99
9.05288	4748.83
9.05279	4733.66
9.0527	4718.5
9.05261	4703.34
9.05252	4688.17
9.05244	4673.01
9.05235	4657.84
9.05226	4642.68
9.05217	4627.51
9.05208	4612.35
9.05199	4597.19
9.0519	4582.02
9.05181	4566.86
9.05172	4551.69
9.05163	4536.53
9.05154	4521.37
9.05145	4506.2
9.05136	4491.04
9.05128	4475.87
9.05119	4460.71
9.0511	4445.54
9.05101	4430.38
9.05092	4415.22
9.05083	4400.05
9.05074	4384.89
9.05065	4369.72
9.05056	4354.56
9.05047	4339.4
9.05038	4324.23
9.05029	4309.07
9.05021	4293.9
9.07576	4278.74
9.07567	4263.58
9.07558	4248.41
9.07549	4233.25
9.0754	4218.08
9.07532	4202.92
9.07523	4187.75
9.07514	4172.59
9.07505	4157.43
9.07496	4142.26
9.07487	4127.1
9.07478	4111.93
9.07469	4096.77
9.10025	4081.61
9.10016	4066.44
9.10007	4051.28
9.09998	4036.11
9.09989	4020.95
9.0998	4005.79
9.09971	3990.62
9.09962	3975.46
9.09953	3960.29
9.09944	3945.13
9.09935	3929.96
9.09927	3914.8
9.09919	3901.53
9.11325	4111.93
9.11316	4096.77
9.12901	3884.47
9.12462	3865.52
9.12453	3850.35
9.12444	3835.19
9.12435	3820.02
9.12426	3804.86
9.12417	3789.7
9.12409	3774.53
9.124	3759.37
9.12391	3744.2
9.12382	3729.04
9.12373	3713.88
9.12364	3698.71
9.12355	3683.55
9.12346	3668.38
9.12337	3653.22
9.12328	3638.06
9.15309	3619.1
9.14871	3600.14
9.14862	3584.98
9.14853	3569.82
9.14844	3554.65
9.14835	3539.49
9.13548	3531.91
9.17816	3520.53
9.17377	3501.58
9.17368	3486.41
9.17359	3471.25
9.1735	3456.09
9.17341	3440.92
9.17332	3425.76
9.17324	3410.59
9.17315	3395.43
9.16028	3387.85
9.18684	3543.28
9.19868	3376.47
9.19859	3361.31
9.1985	3346.15
9.19841	3330.98
9.19832	3315.82
9.19823	3300.65
9.19814	3285.49
9.19807	3272.22
9.22789	3255.16
9.2235	3236.21
9.21063	3228.62
9.25331	3217.25
9.24892	3198.3
9.24883	3183.13
9.24874	3167.97
9.24865	3152.8
9.24857	3137.64
9.24848	3122.47
9.24839	3107.31
9.2483	3092.15
9.24821	3076.98
9.24812	3061.82
9.24803	3046.65
9.24794	3031.49
9.24785	3016.33
9.23498	3008.74
9.27339	2997.37
9.2733	2982.21
9.27321	2967.04
9.27312	2951.88
9.30295	2936.71
9.29856	2917.76
9.29847	2902.6
9.29838	2887.43
9.29829	2872.27
9.29821	2857.1
9.29812	2841.94
9.32792	2822.98
9.32354	2804.03
9.32345	2788.86
9.32336	2773.7
9.32327	2758.54
9.32318	2743.37
9.32309	2728.21
9.323	2713.04
9.32291	2697.88
9.32282	2682.72
9.32274	2667.55
9.32265	2652.39
9.32256	2637.22
9.32247	2622.06
9.32238	2606.89
9.30951	2599.31
9.34791	2587.94
9.34783	2574.67
9.361	2633.43
9.37374	2618.27
9.37365	2603.1
9.37338	2557.61
9.37329	2542.45
9.3732	2527.28
9.37311	2512.12
9.37302	2496.95
9.37293	2481.79
9.37284	2466.63
9.37277	2453.36
9.38638	2587.94
9.38629	2572.78
9.40259	2436.3
9.3982	2417.34
9.39811	2402.18
9.39802	2387.01
9.39793	2371.85
9.39784	2356.69
9.39775	2341.52
9.39766	2326.36
9.41127	2459.04
9.42747	2307.4
9.42309	2288.45
9.423	2273.28
9.42291	2258.12
9.42282	2242.96
9.42273	2227.79
9.42264	2212.63
9.40977	2205.05
9.44817	2193.67
9.44809	2178.51
9.448	2163.34
9.44791	2148.18
9.44782	2133.02
9.44773	2117.85
9.44764	2102.69
9.44755	2087.52
9.44746	2072.36
9.44737	2057.2
9.4772	2042.03
9.47282	2023.08
9.47273	2007.91
9.47264	1992.75
9.47255	1977.58
9.48651	2170.93
9.48642	2155.76
9.48633	2140.6
9.48624	2125.43
9.48615	2110.27
9.48606	2095.11
9.48597	2079.94
9.49871	2064.78
9.49808	1958.63
9.49799	1943.46
9.4979	1928.3
9.49781	1913.14
9.49773	1897.97
9.49764	1882.81
9.49755	1867.64
9.49746	1852.48
9.49737	1837.32
9.49728	1822.15
9.4972	1808.88
9.51144	2049.61
9.51135	2034.45
9.51126	2019.28
9.51117	2004.12
9.51108	1988.96
9.51099	1973.79
9.52702	1791.82
9.52263	1772.87
9.52255	1757.7
9.55235	1738.75
9.54797	1719.79
9.54788	1704.63
9.54779	1689.46
9.5477	1674.3
9.54761	1659.14
9.57742	1640.18
9.57303	1621.23
9.57294	1606.06
9.57285	1590.9
9.57277	1575.73
9.57268	1560.57
9.57259	1545.41
9.5725	1530.24
9.57241	1515.08
9.59795	1498.02
9.61085	1511.29
9.62777	1480.96
9.62339	1462
9.6233	1446.84
9.62321	1431.67
9.62312	1416.51
9.62303	1401.35
9.62294	1386.18
9.62285	1371.02
9.62276	1355.85
9.62267	1340.69
9.62258	1325.53
9.64812	1306.57
9.64803	1291.41
9.6741	1363.44
9.67401	1348.27
9.67392	1333.11
9.67383	1317.94
9.67786	1276.24
9.67347	1257.29
9.67338	1242.12
9.68654	1298.99
9.70319	1223.17
9.69881	1204.21
9.69872	1189.05
9.69863	1173.88
9.69854	1158.72
9.69845	1143.56
9.69836	1128.39
9.72817	1109.44
9.74965	1128.39
9.75368	1086.69
9.74929	1067.74
9.7492	1052.57
9.74912	1037.41
9.74903	1022.24
9.76236	1109.44
9.77883	1003.29
9.77445	984.333
9.77436	969.169
9.77427	954.005
9.77418	938.841
9.80399	919.886
9.78682	908.513
9.82547	938.841
9.8295	897.139
9.82511	878.184
9.82503	863.02
9.83818	919.886
9.85059	849.752
9.8764	878.184
9.87632	863.02
9.88043	836.483
9.87605	817.528
9.86318	809.946
9.90158	798.573
9.90149	783.408
9.9014	768.244
9.90133	754.976
9.93114	737.916
9.92676	718.961
9.92667	703.797
9.92658	688.633
9.93983	760.662
9.9564	670.941
9.96525	722.752
9.96516	707.588
9.97787	688.633
10.0034	669.678
10.0033	654.513
10.0032	639.349
10.0031	624.185
10.003	609.021
10.003	593.857
10.0328	578.693
10.0418	662.095
10.0545	643.14
10.0544	627.976
10.0544	612.812
10.0543	597.648
10.0583	555.947
10.0539	540.782
10.0798	574.902
10.0925	555.947
10.1052	540.782
10.1051	525.618
10.1051	512.35
10.1564	521.827
10.1563	506.663
10.1562	491.499
10.1561	476.335
10.186	457.38
10.1816	440.32
10.1947	495.29
10.2074	476.335
10.233	457.38
10.2329	442.216
10.2459	472.544
10.2842	453.589
10.2841	438.425
10.2841	423.26
10.284	408.096
10.2839	392.932
10.2838	379.664
10.3395	396.723
10.3351	377.768
10.3649	358.813
10.3736	381.559
10.3861	337.962
10.4119	362.604
10.4118	347.44
10.4117	326.589
10.4631	351.231
10.4631	336.067
10.463	324.694
10.5144	351.231
10.5144	336.067
10.5143	320.903
10.5398	305.738
10.5397	290.574
10.5397	279.201
10.5528	336.067
10.5655	317.112
10.5953	298.156
10.5782	286.783
10.6168	320.903
10.6467	305.738
10.6423	286.783
10.6294	279.201
10.6808	298.156
10.6936	282.992
10.6935	267.828
10.6934	252.664
10.745	313.321
10.7449	298.156
10.7448	282.992
10.7319	267.828
10.7962	286.783
10.7961	271.619
10.7832	264.037
10.8517	282.992
10.8473	264.037
10.8344	256.455
10.8732	301.947
10.8987	279.201
10.8986	264.037
10.8985	250.769
10.9543	290.574
10.9499	271.619
10.9498	256.455
10.9498	241.291
10.9885	282.992
11.0012	267.828
11.0011	254.56
10.9882	237.5
11.0525	264.037
11.0524	248.873
11.0395	241.291
11.0822	231.182
11.1039	282.992
11.1038	267.828
11.1037	252.664
11.1293	237.5
11.155	248.873
11.1548	228.022
11.2062	245.082
11.2061	229.918
11.206	214.754
11.2618	245.082
11.2574	226.127
11.2445	218.545
11.3088	245.082
11.3087	229.918
11.3087	218.545
11.3602	252.664
11.3601	237.5
11.36	226.127
11.4114	245.082
11.4113	229.918
11.4112	214.754
11.4111	199.59
11.411	184.425
11.4627	256.455
11.4627	241.291
11.4626	226.127
11.4625	212.858
11.5182	229.918
11.5138	212.858
11.5653	245.082
11.5652	229.918
11.5651	214.754
11.6166	248.873
11.6165	233.709
11.6164	218.545
11.6163	203.381
11.6034	195.799
11.6678	241.291
11.6677	226.127
11.6676	210.963
11.6548	199.59
11.7233	229.918
11.7189	212.858
11.706	199.59
11.7576	237.5
11.7703	222.336
11.7702	209.067
11.8215	214.754
11.8215	199.59
11.847	188.217
11.8729	229.918
11.8728	214.754
11.8727	201.485
11.9241	214.754
11.924	199.59
11.9239	186.321
11.9796	207.172
11.9625	195.799
12.0011	229.918
12.0267	214.754
12.0266	199.59
12.0396	229.918
12.0522	188.217
12.078	214.754
12.0779	199.59
12.1077	185.689
12.1292	207.172
12.155	222.336
12.1548	192.008
12.1547	176.843
12.1418	165.47
12.1805	203.381
12.2103	185.689
12.1931	173.052
12.2318	207.172
12.2616	193.271
12.2831	210.963
12.3087	192.008
12.3345	222.336
12.3344	207.172
12.3642	192.008
12.3471	180.634
12.39	214.754
12.4112	192.008
12.437	218.545
12.437	203.381
12.4668	185.689
12.4883	207.172
12.5181	193.271
12.5396	214.754
12.5694	199.59
12.5651	184.425
12.5909	218.545
12.6165	199.59
12.6164	186.321
12.6465	214.754
12.6677	192.008
12.6676	180.634
12.6807	222.336
12.6934	207.172
12.719	192.008
12.7189	180.634
12.7447	207.172
12.7703	192.008
12.796	207.172
12.8217	222.336
12.8216	192.008
12.8215	180.634
12.8516	207.172
12.8728	184.425
12.8986	214.754
12.8986	199.59
12.9244	229.918
12.9241	184.425
12.924	171.157
12.9542	214.754
12.9498	195.799
12.9625	176.843
13.0012	207.172
13.0011	193.903
13.0396	207.172
13.0524	192.008
13.0779	180.634
13.1037	207.172
13.1037	192.008
13.1551	214.754
13.155	199.59
13.1549	184.425
13.1808	229.918
13.1805	171.157
13.2064	210.963
13.2063	195.799
13.2062	180.634
13.2577	214.754
13.2576	201.485
13.2447	188.217
13.2834	229.918
13.3132	214.754
13.3088	195.799
13.3645	214.754
13.3602	197.694
13.3473	188.217
13.4159	222.336
13.4115	205.276
13.4632	275.41
13.4631	260.246
13.463	245.082
13.4629	229.918
13.45	214.754
13.4499	203.381
13.5186	252.664
13.5014	237.5
13.5014	226.127
13.5657	256.455
13.5656	241.291
13.6171	275.41
13.617	262.142
13.6041	245.082
13.604	233.709
13.6471	291.838
13.6943	320.903
13.6942	305.738
13.6941	290.574
13.7201	347.44
13.72	332.276
13.7498	313.321
13.7454	294.365
13.7325	286.783
13.7752	275.41
13.784	313.321
13.7839	298.156
13.7964	252.664
13.8223	282.992
13.8222	267.828
13.8477	252.664
13.8736	282.992
13.8735	267.828
13.8605	241.291
13.9247	264.037
13.9246	248.873
13.9246	237.5
13.9804	282.992
13.976	264.037
13.9631	252.664
13.9631	241.291
14.0275	290.574
14.0274	275.41
14.0273	260.246
14.0272	248.873
14.0659	290.574
14.0786	271.619
14.0786	256.455
14.0657	248.873
14.13	275.41
14.1171	260.246
14.1813	275.41
14.1812	260.246
14.1811	245.082
14.181	233.709
14.2368	275.41
14.2196	260.246
14.2195	245.082
14.2838	275.41
14.2838	262.142
14.3093	245.082
14.3092	229.918
14.3393	260.246
14.3348	222.336
14.3648	238.764
14.3907	275.41
14.3863	256.455
14.4161	237.5
14.4377	275.41
14.4376	260.246
14.4674	245.082
14.489	279.201
14.4889	264.037
14.5187	245.082
14.5016	233.709
14.54	222.336
14.5399	207.172
14.5658	248.873
14.5657	233.709
14.5526	195.799
14.5912	218.545
14.617	241.291
14.6169	226.127
14.6684	252.664
14.6683	237.5
14.6682	224.231
14.7196	245.082
14.7195	229.918
14.7195	218.545
14.7752	252.664
14.7709	235.604
14.758	226.127
14.8223	252.664
14.8222	237.5
14.8093	226.127
14.8735	252.664
14.8735	237.5
14.8734	226.127
14.9291	245.082
14.9247	226.127
14.9506	267.828
14.9761	248.873
14.976	235.604
14.9631	222.336
15.0274	252.664
15.0273	237.5
15.0787	252.664
15.0786	237.5
15.0785	222.336
15.0784	207.172
15.0784	193.903
15.1039	184.425
15.13	256.455
15.1299	241.291
15.1298	228.022
15.1169	214.754
15.1169	199.59
15.1813	252.664
15.1812	237.5
15.207	267.828
15.1939	226.127
15.2326	252.664
15.2325	237.5
15.2583	267.828
15.2581	226.127
15.2881	252.664
15.2837	233.709
15.3395	267.828
15.3351	248.873
15.335	233.709
15.3349	218.545
15.3648	202.117
15.3864	252.664
15.3864	237.5
15.3863	222.336
15.4421	260.246
15.4377	241.291
15.4376	228.022
15.4247	218.545
15.4933	252.664
15.4889	233.709
15.4888	218.545
15.476	210.963
15.5446	253.928
15.5274	237.5
15.5273	222.336
15.5917	275.41
15.5916	260.246
15.5916	248.873
15.6431	290.574
15.643	275.41
15.6429	260.246
15.6429	246.978
15.6727	229.918
15.6555	218.545
15.6943	279.201
15.6943	264.037
15.6814	252.664
15.7456	279.201
15.7455	264.037
15.7455	250.769
15.8014	305.738
15.797	286.783
15.7969	271.619
15.7968	256.455
15.7839	248.873
15.8484	305.738
15.8483	290.574
15.8482	275.41
15.8481	264.037
15.8996	298.156
15.8995	282.992
15.8994	267.828
15.8994	252.664
15.8993	239.395
15.9254	328.485
15.9253	313.321
15.9509	298.156
15.9508	282.992
15.9507	269.724
15.9378	252.664
15.9377	241.291
15.9766	313.321
16.0065	298.156
16.0021	279.201
15.9892	271.619
16.0537	328.485
16.0536	313.321
16.0535	298.156
16.0534	284.888
16.0405	271.619
16.105	328.485
16.1049	313.321
16.1048	298.156
16.1605	320.903
16.1561	301.947
16.1859	282.992
16.1815	267.828
16.2076	336.067
16.2075	320.903
16.2074	305.738
16.233	294.365
16.2589	339.858
16.2588	324.694
16.2587	309.53
16.3102	336.067
16.3101	320.903
16.31	305.738
16.3356	298.156
16.3659	358.813
16.3615	339.858
16.3614	324.694
16.3613	309.53
16.4001	366.395
16.4128	347.44
16.4127	332.276
16.4126	319.007
16.3997	305.738
16.4684	351.231
16.464	332.276
16.4639	319.007
16.5198	373.977
16.5154	355.022
16.5154	339.858
16.5153	326.589
16.5711	373.977
16.5667	355.022
16.5538	343.649
16.6182	389.141
16.6181	373.977
16.6181	360.708
16.6482	404.305
16.6695	381.559
16.6694	366.395
16.6995	396.723
16.6821	355.022
16.7207	377.768
16.7508	396.723
16.7723	419.469
16.7592	377.768
16.8023	434.634
16.8021	404.305
16.7849	392.932
16.8493	430.843
16.8492	415.678
16.8491	400.514
16.849	385.35
16.8361	377.768
16.9007	449.798
16.9006	434.634
16.9005	419.469
16.8876	404.305
16.9562	449.798
16.9519	430.843
16.939	419.469
16.9389	408.096
17.0035	487.708
17.0034	472.544
17.0033	457.38
17.0032	442.216
17.0548	495.29
17.0547	480.126
17.0546	466.857
17.0417	449.798
17.1104	502.872
17.0932	487.708
17.0932	472.544
17.1365	571.111
17.1321	552.156
17.132	536.991
17.1319	521.827
17.1834	563.529
17.1834	548.365
17.1833	533.2
17.1832	518.036
17.2392	601.439
17.2348	582.484
17.2347	567.32
17.2219	555.947
17.2218	544.573
17.2865	643.14
17.2864	627.976
17.2863	612.812
17.2862	597.648
17.2861	584.379
17.2732	571.111
17.3378	646.931
17.3377	631.767
17.3376	616.603
17.3375	601.439
17.3635	662.095
17.3503	590.066
17.3937	707.588
17.3893	688.633
17.3893	673.469
17.3891	650.722
17.3762	631.767
17.3761	616.603
17.376	605.23
17.4454	768.244
17.441	749.289
17.4409	734.125
17.4408	720.856
17.4279	707.588
17.4278	692.424
17.4277	677.26
17.4276	662.095
17.4276	650.722
17.4713	821.319
17.4669	802.364
17.4669	787.199
17.493	874.393
17.4929	859.229
17.4928	844.065
17.4796	768.244
17.5236	980.542
17.5192	961.587
17.5191	946.423
17.519	931.259
17.5189	916.095
17.5188	900.93
17.5187	887.662
17.5056	828.901
17.5055	817.528
17.5451	1018.45
17.5451	1003.29
17.5754	1079.11
17.571	1060.15
17.5709	1044.99
17.5709	1031.72
17.5578	988.124
17.5577	972.96
17.5576	957.796
17.5575	946.423
17.6025	1314.15
17.5981	1295.2
17.598	1280.03
17.5979	1264.87
17.5978	1249.71
17.5977	1234.54
17.5976	1219.38
[truncated: 3,327 more rows]

## Sheet: SG-06-Untreated
2Theta	Counts (I)
3.81711	2208.65
3.81268	2190.97
3.81256	2176.83
3.81243	2162.69
3.81231	2148.54
3.81218	2134.4
3.81206	2120.26
3.81193	2106.11
3.81181	2091.97
3.8117	2079.59
3.79877	2067.22
3.83879	2244.01
3.83867	2229.87
3.85137	2215.72
3.85124	2201.58
3.86394	2187.44
3.86381	2173.29
3.86369	2159.15
3.86356	2145.01
3.86344	2130.86
3.86332	2116.72
3.86319	2102.58
3.86308	2090.2
3.85015	2077.83
3.91542	2208.65
3.91529	2194.51
3.91517	2180.37
3.91504	2166.22
3.91492	2152.08
3.91479	2137.94
3.91467	2123.79
3.91454	2109.65
3.94559	2236.94
3.94116	2219.26
3.96714	2258.15
3.96664	2201.58
3.96652	2187.44
3.9664	2173.29
3.96627	2159.15
3.96615	2145.01
3.96602	2130.86
3.9659	2116.72
3.96577	2102.58
3.96565	2088.43
3.96555	2077.83
3.99794	2357.16
3.99351	2339.48
3.99338	2325.34
3.99326	2311.19
3.99313	2297.05
3.99301	2282.91
3.99288	2268.76
3.99694	2244.01
3.99251	2226.33
3.99238	2212.19
4.02215	2194.51
4.00493	2180.37
4.00483	2169.76
4.04467	2325.34
4.04455	2311.19
4.04442	2297.05
4.0443	2282.91
4.04417	2268.76
4.04405	2254.62
4.04392	2240.48
4.0438	2226.33
4.04367	2212.19
4.05634	2194.51
4.05622	2180.37
4.08311	2321.8
4.09578	2304.12
4.09565	2289.98
4.09553	2275.83
4.0954	2261.69
4.09528	2247.55
4.09515	2233.4
4.12066	2217.49
4.15131	2300.58
4.14688	2282.91
4.14675	2268.76
4.14663	2254.62
4.1465	2240.48
4.14638	2226.33
4.15044	2201.58
4.17714	2321.8
4.17589	2180.37
4.15867	2166.22
4.20297	2343.01
4.2026	2300.58
4.19819	2284.67
4.18525	2272.3
4.18513	2258.15
4.185	2244.01
4.18488	2229.87
4.18475	2215.72
4.18463	2201.58
4.22453	2364.23
4.22416	2321.8
4.25458	2378.37
4.25433	2350.09
4.2499	2332.41
4.25395	2307.66
4.24952	2289.98
4.30668	2470.3
4.30225	2452.63
4.30212	2438.48
4.302	2424.34
4.30187	2410.2
4.30175	2396.05
4.30162	2381.91
4.3015	2367.77
4.30137	2353.62
4.30127	2341.25
4.28833	2328.87
4.28821	2314.73
4.28808	2300.58
4.28799	2289.98
4.35828	2505.66
4.35385	2487.98
4.35373	2473.84
4.3536	2459.7
4.35348	2445.55
4.35335	2431.41
4.35323	2417.27
4.34031	2406.66
4.34019	2392.52
4.34006	2378.37
4.38411	2526.88
4.40531	2507.43
4.39235	2491.52
4.39222	2477.38
4.3921	2463.23
4.39197	2449.09
4.39185	2434.95
4.39173	2420.8
4.39163	2410.2
4.43559	2548.09
4.43116	2530.41
4.43104	2516.27
4.4623	2668.31
4.45787	2650.63
4.45774	2636.49
4.45762	2622.35
4.45749	2608.2
4.45737	2594.06
4.45724	2579.92
4.45712	2565.77
4.46978	2548.09
4.50944	2682.45
4.50931	2668.31
4.50919	2654.17
4.50906	2640.02
4.50894	2625.88
4.50881	2611.74
4.50869	2597.59
4.50856	2583.45
4.50844	2569.31
4.53521	2696.6
4.56525	2710.74
4.565	2682.45
4.56057	2664.78
4.56045	2650.63
4.56034	2638.26
4.58743	2802.67
4.58731	2788.53
4.58718	2774.39
4.58706	2760.24
4.58693	2746.1
4.58681	2731.96
4.61233	2717.81
4.61221	2703.67
4.61208	2689.53
4.61197	2677.15
4.64337	2845.1
4.63894	2827.42
4.63882	2813.28
4.63869	2799.14
4.63857	2784.99
4.63844	2770.85
4.63832	2756.71
4.63819	2742.56
4.63807	2728.42
4.66506	2880.46
4.66493	2866.32
4.65077	2714.28
4.69045	2852.17
4.69033	2838.03
4.6902	2823.89
4.69008	2809.74
4.72075	2894.6
4.71632	2876.93
4.71619	2862.78
4.71987	2795.6
4.71544	2777.92
4.71532	2763.78
4.71521	2751.4
4.74708	2972.39
4.74265	2954.71
4.74252	2940.57
4.7424	2926.43
4.74227	2912.28
4.72886	2845.1
4.72873	2830.96
4.72861	2816.82
4.76901	3036.04
4.76888	3021.89
4.76876	3007.75
4.76864	2993.61
4.76778	2896.37
4.79503	3078.47
4.7949	3064.32
4.79478	3050.18
4.79416	2979.46
4.79403	2965.32
4.79391	2951.18
4.7938	2938.8
4.78083	2922.89
4.78071	2908.75
4.82457	3036.04
4.82014	3018.36
4.82002	3004.22
4.81989	2990.07
4.85091	3113.83
4.84648	3096.15
4.84635	3082
4.84623	3067.86
4.8461	3053.72
4.83256	2972.39
4.83244	2958.25
4.87586	3036.04
4.87143	3018.36
4.87131	3004.22
4.8712	2991.84
4.90357	3269.4
4.89914	3251.72
4.89901	3237.58
4.89889	3223.44
4.89876	3209.29
4.89864	3195.15
4.89851	3181.01
4.89839	3166.86
4.89827	3152.72
4.89814	3138.58
4.89802	3124.43
4.89789	3110.29
4.89777	3096.15
4.89764	3082
4.89752	3067.86
4.89739	3053.72
4.91006	3036.04
4.90996	3025.43
4.95567	3361.34
4.95124	3343.66
4.95112	3329.51
4.95099	3315.37
4.95087	3301.23
4.95074	3287.08
4.95062	3272.94
4.95049	3258.8
4.95037	3244.65
4.95024	3230.51
4.95012	3216.37
4.9372	3205.76
5.00306	3403.77
5.00294	3389.62
5.00281	3375.48
5.00269	3361.34
5.00258	3348.96
4.98961	3333.05
4.98949	3318.91
4.9894	3308.3
5.03435	3559.34
5.02992	3541.66
5.0298	3527.52
5.02967	3513.38
5.02955	3499.23
5.02942	3485.09
5.0293	3470.95
5.02917	3456.8
5.02905	3442.66
5.02892	3428.52
5.0288	3414.37
5.04147	3396.69
5.04134	3382.55
5.04122	3368.41
5.04112	3357.8
5.08608	3608.84
5.08165	3591.16
5.08153	3577.02
5.0814	3562.88
5.08128	3548.73
5.08115	3534.59
5.08104	3522.22
5.06811	3509.84
5.06799	3495.7
5.06786	3481.55
5.06774	3467.41
5.06764	3456.8
5.11254	3700.78
5.10811	3683.1
5.10798	3668.95
5.10786	3654.81
5.10773	3640.67
5.10761	3626.52
5.13849	3736.13
5.13406	3718.45
5.13313	3612.38
5.12015	3594.7
5.12002	3580.56
5.1199	3566.41
5.1603	3785.64
5.16018	3771.49
5.16005	3757.35
5.14673	3700.78
5.14661	3686.63
5.14648	3672.49
5.14636	3658.35
5.14623	3644.2
5.14611	3630.06
5.19134	3912.93
5.18691	3895.25
5.18679	3881.1
5.18666	3866.96
5.18654	3852.82
5.18641	3838.67
5.18629	3824.53
5.18617	3810.39
5.18604	3796.24
5.18563	3750.28
5.2129	3934.14
5.19871	3778.56
5.19858	3764.42
5.23905	3990.71
5.23892	3976.57
5.2388	3962.43
5.23867	3948.28
5.23842	3920
5.2383	3905.85
5.22535	3891.71
5.22523	3877.57
5.22513	3866.96
5.26996	4103.86
5.26553	4086.18
5.26541	4072.04
5.26528	4057.89
5.26516	4043.75
5.26504	4029.61
5.26491	4015.46
5.26479	4001.32
5.25137	3934.14
5.29605	4153.36
5.29162	4135.68
5.29149	4121.54
5.31857	4284.19
5.31845	4270.05
5.31832	4255.9
5.3182	4241.76
5.31807	4227.62
5.31795	4213.47
5.31782	4199.33
5.3177	4185.19
5.31757	4171.04
5.30416	4103.86
5.30403	4089.72
5.30391	4075.57
5.30378	4061.43
5.30366	4047.29
5.30353	4033.14
5.30341	4019
5.30328	4004.86
5.33027	4156.9
5.37523	4407.94
5.3708	4390.26
5.37067	4376.12
5.37055	4361.98
5.37042	4347.83
5.3703	4333.69
5.37017	4319.55
5.37005	4305.4
5.36992	4291.26
5.3698	4277.12
5.36969	4264.74
5.35676	4252.37
5.35663	4238.22
5.35651	4224.08
5.35638	4209.94
5.39741	4499.87
5.39729	4485.73
5.39716	4471.59
5.39704	4457.44
5.39691	4443.3
5.39679	4429.16
5.4282	4598.88
5.42377	4581.2
5.42365	4567.06
5.42352	4552.91
5.4234	4538.77
5.42327	4524.63
5.42315	4510.48
5.40952	4418.55
5.45101	4761.53
5.45089	4747.38
5.45076	4733.24
5.45064	4719.1
5.45051	4704.95
5.45039	4690.81
5.45026	4676.67
5.45014	4662.52
5.45001	4648.38
5.44989	4634.24
5.44976	4620.09
5.43582	4492.8
5.43572	4482.2
5.46246	4605.95
5.46233	4591.81
5.46221	4577.66
5.46209	4563.52
5.46196	4549.38
5.46184	4535.23
5.46171	4521.09
5.46159	4506.95
5.50689	4796.88
5.50246	4779.21
5.50233	4765.06
5.50221	4750.92
5.50208	4736.78
5.50196	4722.63
5.50183	4708.49
5.50171	4694.35
5.50158	4680.2
5.50146	4666.06
5.50135	4653.68
5.48842	4641.31
5.52857	4832.24
5.52844	4818.1
5.55999	5001.96
5.55556	4984.28
5.55543	4970.14
5.55531	4956
5.55518	4941.85
5.55506	4927.71
5.55493	4913.57
5.55481	4899.42
5.55468	4885.28
5.55456	4871.14
5.55443	4856.99
5.55431	4842.85
5.554	4807.49
5.54102	4789.81
5.54089	4775.67
5.54077	4761.53
5.58267	5150.47
5.58254	5136.32
5.58242	5122.18
5.58229	5108.04
5.58217	5093.89
5.58204	5079.75
5.58192	5065.61
5.58179	5051.46
5.58167	5037.32
5.58154	5023.18
5.56697	4825.17
5.59427	5012.57
5.63514	5284.83
5.63502	5270.69
5.63489	5256.54
5.63477	5242.4
5.63464	5228.26
5.63452	5214.11
5.63439	5199.97
5.63427	5185.83
5.63415	5171.68
5.63402	5157.54
5.6339	5143.4
5.63377	5129.25
5.63365	5115.11
5.6207	5100.97
5.62057	5086.82
5.62045	5072.68
5.62032	5058.54
5.66191	5412.12
5.66179	5397.98
5.66166	5383.83
5.66154	5369.69
5.66141	5355.55
5.66129	5341.4
5.66116	5327.26
5.66104	5313.12
5.66091	5298.97
5.68793	5454.55
5.68781	5440.41
5.68768	5426.26
5.68643	5284.83
5.68631	5270.69
5.68618	5256.54
5.68606	5242.4
5.68593	5228.26
5.68581	5214.11
5.68569	5199.97
5.68556	5185.83
5.68544	5171.68
5.68531	5157.54
5.68519	5143.4
5.68509	5132.79
5.71748	5412.12
5.71305	5394.44
5.71292	5380.3
5.7128	5366.15
5.71267	5352.01
5.71255	5337.87
5.71242	5323.72
5.7123	5309.58
5.71219	5297.21
5.74393	5504.05
5.7395	5486.37
5.73938	5472.23
5.73925	5458.09
5.73914	5445.71
5.72621	5433.34
5.76574	5553.55
5.76562	5539.41
5.76549	5525.27
5.79691	5694.99
5.79248	5677.31
5.79235	5663.16
5.79223	5649.02
5.7921	5634.88
5.79198	5620.73
5.79185	5606.59
5.79173	5592.45
5.7916	5578.3
5.79148	5564.16
5.79529	5511.12
5.79086	5493.44
5.79073	5479.3
5.79061	5465.16
5.79048	5451.01
5.7776	5443.94
5.82361	5815.21
5.81918	5797.53
5.81906	5783.38
5.81893	5769.24
5.81881	5755.1
5.81868	5740.95
5.81856	5726.81
5.81844	5712.67
5.82124	5546.48
5.81681	5528.8
5.82024	5433.34
5.81581	5415.66
5.81571	5403.28
5.8028	5394.44
5.8482	5694.99
5.84377	5677.31
5.84364	5663.16
5.84352	5649.02
5.84339	5634.88
5.84327	5620.73
5.84314	5606.59
5.84302	5592.45
5.84289	5578.3
5.84277	5564.16
5.82948	5511.12
5.82935	5496.98
5.82923	5482.84
5.82911	5468.69
5.82898	5454.55
5.85781	5815.21
5.85768	5801.06
5.85756	5786.92
5.85743	5772.78
5.85731	5758.63
5.85718	5744.49
5.86988	5730.35
5.86976	5716.2
5.85544	5546.48
5.85531	5532.34
5.85522	5521.73
5.88245	5702.06
5.88233	5687.92
5.88221	5673.77
5.88208	5659.63
5.89475	5641.95
5.89462	5627.81
5.8945	5613.66
5.89437	5599.52
5.89425	5585.38
5.89412	5571.23
5.92389	5553.55
5.91946	5535.87
5.91933	5521.73
5.91921	5507.59
5.91908	5493.44
5.91896	5479.3
5.91883	5465.16
5.91871	5451.01
5.91858	5436.87
5.91846	5422.73
5.90557	5415.66
5.94822	5405.05
5.94379	5387.37
5.94367	5373.23
5.971	5564.16
5.97087	5550.02
5.97075	5535.87
5.97062	5521.73
5.9705	5507.59
5.97037	5493.44
5.97025	5479.3
5.97012	5465.16
5.97	5451.01
5.96987	5436.87
5.96975	5422.73
5.97343	5355.55
5.969	5337.87
5.96887	5323.72
5.96875	5309.58
5.96863	5295.44
5.9685	5281.29
5.96838	5267.15
5.95549	5260.08
5.98241	5405.05
5.98229	5390.91
5.98217	5376.76
5.99386	5249.47
6.01939	5235.33
6.01926	5221.19
6.01914	5207.04
6.01901	5192.9
6.01889	5178.76
6.01876	5164.61
6.01864	5150.47
6.01851	5136.32
6.01839	5122.18
6.01826	5108.04
6.01814	5093.89
6.01801	5079.75
6.01789	5065.61
6.01776	5051.46
6.04756	5037.32
6.04313	5019.64
6.043	5005.5
6.04288	4991.36
6.04275	4977.21
6.04263	4963.07
6.0425	4948.93
6.04238	4934.78
6.04225	4920.64
6.04213	4906.5
6.042	4892.35
6.04188	4878.21
6.04175	4864.07
6.04163	4849.92
6.05654	5086.82
6.05642	5072.68
6.05629	5058.54
6.06712	4832.24
6.06699	4818.1
6.06687	4803.96
6.06674	4789.81
6.06662	4775.67
6.06649	4761.53
6.06637	4747.38
6.08007	4846.39
6.09616	4733.24
6.09173	4715.56
6.09161	4701.42
6.09148	4687.27
6.09136	4673.13
6.09124	4658.99
6.09111	4644.84
6.09099	4630.7
6.09086	4616.56
6.07798	4609.49
6.10552	4825.17
6.1054	4811.03
6.10527	4796.88
6.10515	4782.74
6.10503	4768.6
6.1049	4754.45
6.11635	4598.88
6.11623	4584.73
6.1161	4570.59
6.11598	4556.45
6.11585	4542.3
6.11573	4528.16
6.1156	4514.02
6.11548	4499.87
6.11535	4485.73
6.11524	4473.36
6.13005	4697.88
6.12992	4683.74
6.1298	4669.59
6.12967	4655.45
6.12955	4641.31
6.12942	4627.16
6.1293	4613.02
6.14502	4457.44
6.14059	4439.77
6.14047	4425.62
6.14034	4411.48
6.14022	4397.34
6.14009	4383.19
6.12721	4376.12
6.16558	4365.51
6.16546	4351.37
6.16533	4337.23
6.16521	4323.08
6.16508	4308.94
6.16496	4294.8
6.16483	4280.65
6.16471	4266.51
6.16458	4252.37
6.16446	4238.22
6.16433	4224.08
6.16421	4209.94
6.16408	4195.79
6.16396	4181.65
6.16383	4167.51
6.16371	4153.36
6.16358	4139.22
6.16346	4125.08
6.16334	4110.93
6.16321	4096.79
6.16309	4082.65
6.16298	4070.27
6.20224	4160.43
6.20212	4146.29
6.20199	4132.15
6.20187	4118
6.20174	4103.86
6.20162	4089.72
6.20149	4075.57
6.21416	4057.89
6.21403	4043.75
6.21391	4029.61
6.21378	4015.46
6.21366	4001.32
6.21353	3987.18
6.21341	3973.03
6.21328	3958.89
6.21316	3944.75
6.21303	3930.6
6.21291	3916.46
6.21278	3902.32
6.21266	3888.17
6.21254	3874.03
6.21241	3859.89
6.21229	3845.74
6.1994	3838.67
6.24205	3828.07
6.23762	3810.39
6.23749	3796.24
6.23737	3782.1
6.23724	3767.96
6.23712	3753.81
6.237	3739.67
6.23687	3725.53
6.23675	3711.38
6.23662	3697.24
6.2365	3683.1
6.23637	3668.95
6.23625	3654.81
6.23615	3644.2
6.25091	3863.42
6.25078	3849.28
6.27537	3729.06
6.27524	3714.92
6.27512	3700.78
6.27499	3686.63
6.27487	3672.49
6.28754	3654.81
6.28741	3640.67
6.28729	3626.52
6.28716	3612.38
6.28704	3598.24
6.28691	3584.09
6.28679	3569.95
6.28666	3555.81
6.28654	3541.66
6.28641	3527.52
6.28629	3513.38
6.28616	3499.23
6.28604	3485.09
6.28591	3470.95
6.28579	3456.8
6.28566	3442.66
6.28554	3428.52
6.28542	3414.37
6.28529	3400.23
6.28517	3386.09
6.28504	3371.94
6.28492	3357.8
6.28479	3343.66
6.28467	3329.51
6.27178	3322.44
6.31016	3311.83
6.31003	3297.69
6.30991	3283.55
6.30978	3269.4
6.30966	3255.26
6.30953	3241.12
6.30941	3226.97
6.32373	3396.69
6.3236	3382.55
6.32348	3368.41
6.32335	3354.26
6.32323	3340.12
6.3231	3325.98
6.33493	3212.83
6.3348	3198.69
6.33468	3184.54
6.33455	3170.4
6.33443	3156.26
6.3343	3142.11
6.33418	3127.97
6.33407	3115.59
6.36385	3099.68
6.35942	3082
6.37308	3177.47
6.37296	3163.33
6.37283	3149.18
6.37271	3135.04
6.37258	3120.9
6.38918	3064.32
6.38475	3046.65
6.38463	3032.5
6.3845	3018.36
6.38438	3004.22
6.38425	2990.07
6.38413	2975.93
6.384	2961.79
6.38388	2947.64
6.38375	2933.5
6.38363	2919.36
6.3835	2905.21
6.40899	2887.53
6.40887	2873.39
6.40874	2859.25
6.40862	2845.1
6.40849	2830.96
6.40837	2816.82
6.40824	2802.67
6.40812	2788.53
6.40799	2774.39
6.40787	2760.24
6.40774	2746.1
6.40764	2733.72
6.42231	2944.11
6.42219	2929.96
6.42206	2915.82
6.42194	2901.68
6.43314	2717.81
6.43302	2703.67
6.43289	2689.53
6.43277	2675.38
6.43264	2661.24
6.43252	2647.1
6.43239	2632.95
6.43227	2618.81
6.43216	2606.43
6.44646	2774.39
6.44634	2760.24
6.44621	2746.1
6.44609	2731.96
6.47111	2661.24
6.47098	2647.1
6.47086	2632.95
6.47073	2618.81
6.47061	2604.67
6.48331	2590.52
6.48318	2576.38
6.48306	2562.24
6.48293	2548.09
6.48281	2533.95
6.48268	2519.81
6.48256	2505.66
6.48243	2491.52
6.48231	2477.38
6.48218	2463.23
6.48206	2449.09
6.48193	2434.95
6.48183	2422.57
6.50733	2406.66
6.50721	2392.52
6.50708	2378.37
6.50697	2366
6.5204	2434.95
6.52028	2420.8
6.53675	2350.09
6.53232	2332.41
6.5322	2318.26
6.53207	2304.12
6.53195	2289.98
6.53182	2275.83
6.5317	2261.69
6.53157	2247.55
6.54549	2371.3
6.56134	2229.87
6.55691	2212.19
6.55678	2198.05
6.55666	2183.9
6.54377	2176.83
6.58214	2166.22
6.58202	2152.08
6.5819	2137.94
6.58177	2123.79
6.58165	2109.65
6.58154	2097.27
6.59534	2208.65
6.60801	2190.97
6.60788	2176.83
6.60709	2086.67
6.62055	2159.15
6.62043	2145.01
6.6203	2130.86
6.62018	2116.72
6.62005	2102.58
6.63262	2074.29
6.6325	2060.15
6.63237	2046
6.63225	2031.86
6.63212	2017.72
6.632	2003.57
6.63188	1989.43
6.63175	1975.29
6.66155	1961.14
6.64435	1950.54
6.67078	2038.93
6.67065	2024.79
6.67053	2010.65
6.67041	1996.5
6.67028	1982.36
6.68273	1939.93
6.6826	1925.79
6.68248	1911.64
6.68235	1897.5
6.68223	1883.36
6.6821	1869.21
6.68198	1855.07
6.68186	1840.93
6.68173	1826.78
6.68164	1816.17
6.6958	1968.22
6.7085	1954.07
6.7212	1939.93
6.72107	1925.79
6.72095	1911.64
6.72082	1897.5
6.7207	1883.36
6.72057	1869.21
6.73324	1851.53
6.73311	1837.39
6.73299	1823.25
6.73286	1809.1
6.73274	1794.96
6.73262	1780.82
6.73249	1766.67
6.73237	1752.53
6.7579	1740.15
6.77136	1812.64
6.77124	1798.5
6.77111	1784.35
6.77099	1770.21
6.77086	1756.07
6.78771	1727.78
6.78328	1710.1
6.78316	1695.96
6.78303	1681.81
6.78291	1667.67
6.78278	1653.53
6.7699	1646.45
6.82159	1692.42
6.82147	1678.28
6.82134	1664.13
6.83401	1646.45
6.83389	1632.31
6.83376	1618.17
6.83364	1604.02
6.83351	1589.88
6.83339	1575.74
6.83326	1561.59
6.83314	1547.45
6.82025	1540.38
6.8629	1529.77
6.85847	1512.09
6.85836	1499.72
6.87214	1607.56
6.87201	1593.42
6.88468	1575.74
6.88455	1561.59
6.88443	1547.45
6.91419	1529.77
6.90976	1512.09
6.89688	1505.02
6.93952	1494.41
6.93509	1476.73
6.92221	1469.66
6.96058	1459.06
6.96046	1444.91
6.96033	1430.77
6.99013	1416.63
6.9857	1398.95
6.98557	1384.8
6.98545	1370.66
6.98535	1360.05
7.03724	1427.23
7.03711	1413.09
7.03699	1398.95
7.03686	1384.8
7.03674	1370.66
7.03661	1356.52
7.03649	1342.37
7.03636	1328.23
7.03624	1314.09
7.03613	1301.71
7.08769	1331.77
7.08756	1317.62
7.08744	1303.48
7.08731	1289.34
7.08719	1275.19
7.08708	1262.82
7.11342	1342.37
7.12609	1324.69
7.12597	1310.55
7.13863	1292.87
7.13851	1278.73
7.12562	1271.66
7.164	1261.05
7.16387	1246.91
7.16375	1232.76
7.16364	1220.39
7.18914	1204.48
7.18905	1193.87
7.21944	1246.91
7.21501	1229.23
7.21488	1215.08
7.24465	1197.4
7.26642	1243.37
7.2663	1229.23
7.26617	1215.08
7.29594	1197.4
7.27875	1186.8
7.31762	1232.76
7.31749	1218.62
7.34302	1204.48
7.34289	1190.33
7.34277	1176.19
7.34264	1162.04
7.34252	1147.9
7.36888	1229.23
7.36875	1215.08
7.36808	1139.06
7.39424	1197.4
7.39412	1183.26
7.39399	1169.12
7.39387	1154.97
7.42011	1222.15
7.41998	1208.01
7.42366	1140.83
7.41923	1123.15
7.40635	1116.08
7.44975	1190.33
7.44532	1172.65
7.44519	1158.51
7.45848	1211.55
7.47068	1140.83
7.47055	1126.69
7.47043	1112.54
7.49667	1179.72
7.49654	1165.58
7.49642	1151.44
7.50022	1098.4
7.48303	1087.79
7.52191	1133.76
7.52178	1119.61
7.52141	1077.18
7.52128	1063.04
7.52116	1048.9
7.5473	1105.47
7.54718	1091.33
7.54669	1036.52
7.56038	1133.76
7.57304	1116.08
7.57697	1077.18
7.57254	1059.51
7.57242	1045.36
7.59853	1098.4
7.59791	1027.68
7.61148	1112.54
7.62405	1084.26
7.62393	1070.11
7.6238	1055.97
7.62368	1041.83
7.6492	1027.68
7.66252	1084.26
7.66239	1070.11
7.66227	1055.97
7.67494	1038.29
7.67899	1013.54
7.67456	995.861
7.66168	988.789
7.70433	978.181
7.72601	1013.54
7.72588	999.396
7.72551	956.966
7.72538	942.823
7.72526	928.68
7.75187	1038.29
7.75175	1024.15
7.75568	985.253
7.75125	967.574
7.76441	1006.47
7.77675	951.663
7.78993	992.325
7.78981	978.181
7.80251	964.038
7.80226	935.751
7.80213	921.608
7.80201	907.465
7.80188	893.321
7.80176	879.178
7.80163	865.035
7.80154	854.427
7.8323	949.895
7.85349	928.68
7.85336	914.536
7.85324	900.393
7.85311	886.25
7.85299	872.106
7.85286	857.963
7.85277	847.356
7.88353	942.823
7.89189	921.608
7.90459	907.465
7.90446	893.321
7.90434	879.178
7.90421	865.035
7.92974	850.891
7.92961	836.748
7.95588	907.465
7.95575	893.321
7.95563	879.178
7.95551	865.035
8.00723	914.536
8.00711	900.393
8.00698	886.25
8.00686	872.106
8.03667	860.32
8.05871	935.751
8.05859	921.608
8.05846	907.465
8.05834	893.321
8.04539	879.178
8.11434	942.823
8.10991	925.144
8.10978	911.001
8.10966	896.857
8.10953	882.714
8.10941	868.571
8.10928	854.427
8.10916	840.284
8.09627	833.212
8.16129	935.751
8.16117	921.608
8.16104	907.465
8.16092	893.321
8.16079	879.178
8.14784	865.035
8.14775	854.427
8.19146	964.038
8.18703	946.359
8.21742	999.396
8.21299	981.717
8.21679	928.68
8.21236	911.001
8.21224	896.857
8.21211	882.714
8.23848	964.038
8.23835	949.895
8.26437	992.325
8.26425	978.181
8.26387	935.751
8.26375	921.608
8.26362	907.465
8.2635	893.321
8.25055	879.178
8.25046	868.571
8.29048	1045.36
8.29036	1031.22
8.29023	1017.08
8.29011	1002.93
8.27694	964.038
8.27682	949.895
8.31563	988.789
8.34602	1041.83
8.34159	1024.15
8.34146	1010
8.34134	995.861
8.3721	1091.33
8.36767	1073.65
8.36754	1059.51
8.36687	983.485
8.39366	1112.54
8.38021	1041.83
8.38009	1027.68
8.37996	1013.54
8.37984	999.396
8.41955	1140.83
8.41943	1126.69
8.40636	1098.4
8.40623	1084.26
8.40611	1070.11
8.47568	1204.48
8.47125	1186.8
8.47112	1172.65
8.471	1158.51
8.47087	1144.37
8.47076	1131.99
8.45786	1123.15
8.49736	1239.83
8.49724	1225.69
8.52351	1296.41
8.52338	1282.26
8.52326	1268.12
8.52313	1253.98
8.50993	1211.55
8.50981	1197.4
8.50972	1186.8
8.54865	1239.83
8.54854	1227.46
8.57932	1324.69
8.57489	1307.01
8.57477	1292.87
8.57464	1278.73
8.57452	1264.58
8.57441	1252.21
8.601	1360.05
8.60088	1345.91
8.63105	1374.2
8.62646	1338.84
8.65298	1437.84
8.65286	1423.7
8.65273	1409.55
8.65261	1395.41
8.65223	1352.98
8.67813	1381.27
8.67802	1368.89
8.66496	1342.37
8.70427	1437.84
8.70415	1423.7
8.70402	1409.55
8.7039	1395.41
8.71659	1381.27
8.75581	1466.13
8.75569	1451.98
8.75556	1437.84
8.74261	1423.7
8.74249	1409.55
8.74236	1395.41
8.7861	1508.56
8.78167	1490.88
8.78156	1478.5
8.80816	1586.35
8.80804	1572.2
8.80791	1558.06
8.80779	1543.92
8.80766	1529.77
8.83431	1642.92
8.83418	1628.78
8.83406	1614.63
8.83393	1600.49
8.82036	1515.63
8.82024	1501.49
8.8607	1727.78
8.86058	1713.64
8.86045	1699.49
8.86033	1685.35
8.8602	1671.21
8.86008	1657.06
8.84666	1589.88
8.89224	1911.64
8.88781	1893.96
8.88769	1879.82
8.88756	1865.68
8.88744	1851.53
8.88731	1837.39
8.88719	1823.25
8.88706	1809.1
8.88694	1794.96
8.88681	1780.82
8.88669	1766.67
8.88656	1752.53
8.88644	1738.39
8.87281	1646.45
8.91605	2187.44
8.91592	2173.29
8.9158	2159.15
8.91567	2145.01
8.91555	2130.86
8.91542	2116.72
8.9153	2102.58
8.91517	2088.43
8.91505	2074.29
8.91492	2060.15
8.9148	2046
8.91467	2031.86
8.91455	2017.72
8.91442	2003.57
8.9143	1989.43
8.91417	1975.29
8.91405	1961.14
8.91392	1947
8.9138	1932.86
8.89911	1720.71
8.94306	2343.01
8.94294	2328.87
8.94281	2314.73
8.94269	2300.58
8.94257	2286.44
8.94244	2272.3
8.94232	2258.15
8.94219	2244.01
8.94207	2229.87
8.94194	2215.72
8.94182	2201.58
8.92653	1922.25
8.97461	2526.88
8.97018	2509.2
8.97005	2495.06
8.96993	2480.91
8.9698	2466.77
8.96968	2452.63
8.96955	2438.48
8.96943	2424.34
8.9693	2410.2
8.96918	2396.05
8.96905	2381.91
8.96893	2367.77
8.9688	2353.62
8.95451	2187.44
8.95439	2173.29
8.95426	2159.15
8.95414	2145.01
8.95401	2130.86
8.95389	2116.72
8.95377	2102.58
8.99429	2335.94
8.99417	2321.8
8.99404	2307.66
9.00874	2519.81
9.00861	2505.66
9.00849	2491.52
9.00836	2477.38
9.00824	2463.23
9.00811	2449.09
9.00799	2434.95
9.00786	2420.8
9.00774	2406.66
9.00761	2392.52
9.00749	2378.37
9.00736	2364.23
9.00724	2350.09
9.01956	2293.51
9.01944	2279.37
9.01931	2265.23
9.01919	2251.08
9.01906	2236.94
9.01894	2222.8
9.01881	2208.65
9.01869	2194.51
9.01856	2180.37
9.01844	2166.22
9.01832	2152.08
9.01819	2137.94
9.01807	2123.79
9.01794	2109.65
9.01782	2095.51
9.01769	2081.36
9.01757	2067.22
9.01744	2053.08
9.04296	2038.93
9.04284	2024.79
9.04271	2010.65
9.04259	1996.5
9.04246	1982.36
9.04234	1968.22
9.04221	1954.07
9.04209	1939.93
9.04196	1925.79
9.04184	1911.64
9.04171	1897.5
9.04159	1883.36
9.04146	1869.21
9.04134	1855.07
9.04121	1840.93
9.04109	1826.78
9.04097	1812.64
9.04084	1798.5
9.04072	1784.35
9.04059	1770.21
9.04047	1756.07
9.04034	1741.92
9.06586	1727.78
9.06574	1713.64
9.06561	1699.49
9.06549	1685.35
9.06536	1671.21
9.06524	1657.06
9.06511	1642.92
9.06499	1628.78
9.06486	1614.63
9.06474	1600.49
9.09026	1586.35
9.09013	1572.2
9.09001	1558.06
9.08988	1543.92
9.08976	1529.77
9.08964	1515.63
9.08951	1501.49
9.08939	1487.34
9.08926	1473.2
9.08914	1459.06
9.08901	1444.91
9.0889	1432.54
9.11441	1416.63
9.11428	1402.48
9.11416	1388.34
9.11403	1374.2
9.11391	1360.05
9.12773	1473.2
9.1276	1459.06
9.12748	1444.91
9.12735	1430.77
9.13943	1345.91
9.1393	1331.77
9.13918	1317.62
9.13905	1303.48
9.13893	1289.34
9.1388	1275.19
9.13869	1262.82
9.16847	1246.91
9.16404	1229.23
9.15116	1222.15
9.17733	1282.26
9.19003	1268.12
9.20273	1253.98
9.2026	1239.83
9.2153	1225.69
9.21518	1211.55
9.21505	1197.4
9.21493	1183.26
9.2148	1169.12
9.21468	1154.97
9.21455	1140.83
9.24012	1131.99
9.25333	1176.19
9.25321	1162.04
9.25308	1147.9
9.26566	1119.61
9.26553	1105.47
9.2786	1133.76
9.29105	1091.33
9.29093	1077.18
9.29082	1064.81
9.30413	1119.61
9.304	1105.47
9.31632	1048.9
9.3162	1034.75
9.31607	1020.61
9.31595	1006.47
9.31582	992.325
9.31572	979.949
9.32952	1091.33
9.3294	1077.18
9.32927	1063.04
9.34122	964.038
9.3411	949.895
9.34097	935.751
9.34085	921.608
9.34072	907.465
9.35429	992.325
9.36696	974.646
9.3663	900.393
9.39242	953.431
9.39229	939.287
9.39217	925.144
9.39204	911.001
9.42181	893.321
9.41738	875.642
9.41725	861.499
9.41713	847.356
9.417	833.212
9.43067	928.68
9.44336	914.536
9.44249	815.533
9.44237	801.39
9.44227	790.782
9.47316	900.393
9.46873	882.714
9.4686	868.571
9.46848	854.427
9.46835	840.284
9.46823	826.141
9.49799	808.461
9.49356	790.782
9.48068	783.71
9.50723	886.25
9.51989	868.571
9.51977	854.427
9.51964	840.284
9.51952	826.141
9.54928	808.461
9.54485	790.782
9.54473	776.639
9.53184	769.567
9.57022	758.96
9.57011	746.584
9.59611	787.246
9.59599	773.103
9.60869	758.96
9.62138	744.816
9.62126	730.673
9.62113	716.53
9.62102	704.154
9.65979	737.745
9.65966	723.601
9.67233	705.922
9.67221	691.779
9.67211	681.171
9.72356	698.85
9.72343	684.707
9.72331	670.564
9.72318	656.42
9.73588	642.277
9.762	695.315
9.77469	681.171
9.77457	667.028
9.77444	652.885
9.80424	638.741
9.79984	624.598
9.81297	659.956
9.83849	645.813
9.85119	631.67
9.85107	617.526
9.85094	603.383
9.85083	591.007
9.87638	580.4
9.8896	624.598
9.90229	610.455
9.90217	596.311
9.90192	568.024
9.9018	553.881
9.9017	543.274
9.92769	582.168
9.94064	596.311
9.95321	568.024
9.95309	553.881
9.95296	539.738
9.95284	525.594
9.95274	514.987
9.97898	582.168
10.0088	568.024
10.0043	550.345
10.0042	536.202
10.0041	523.827
10.0558	568.024
10.0557	553.881
10.0555	539.738
10.0554	525.594
10.0852	513.808
10.107	560.953
10.1069	546.809
10.1068	532.666
10.1366	518.523
10.1321	500.844
10.132	486.7
10.1319	474.325
10.1454	553.881
10.1581	536.202
10.1879	518.523
10.1834	500.844
10.1833	486.7
10.1832	472.557
10.2094	539.738
10.1959	458.414
10.2221	525.594
10.2348	511.451
10.2347	497.308
10.2346	483.164
10.2344	469.021
10.26	454.878
10.2599	444.27
10.2861	511.451
10.286	497.308
10.2859	483.164
10.2857	469.021
10.3118	522.059
10.3155	454.878
10.3111	438.966
10.3373	500.844
10.3372	486.7
10.337	472.557
10.3668	454.878
10.3624	437.199
10.3623	423.055
10.3757	490.236
10.3883	472.557
10.4181	454.878
10.4137	437.199
10.4135	423.055
10.4135	412.448
10.4396	472.557
10.4651	454.878
10.465	440.734
10.4649	426.591
10.4647	412.448
10.4646	400.072
10.4781	469.021
10.4902	387.697
10.5163	437.199
10.5161	423.055
10.516	408.912
10.5159	394.768
10.5674	426.591
10.5673	412.448
10.5672	398.304
10.5543	387.697
10.6186	415.984
10.6185	401.84
10.6184	387.697
10.6055	377.089
10.6702	440.734
10.67	426.591
10.6699	412.448
10.6698	398.304
10.6996	385.34
10.7254	405.376
10.7466	384.161
10.7465	371.786
10.7725	412.448
10.7724	398.304
10.7982	423.055
10.8022	384.161
10.785	373.553
10.8109	405.376
10.8276	362.946
10.8232	348.803
10.8491	380.625
10.8789	362.946
10.8617	348.803
10.9005	384.161
10.926	366.482
10.9258	352.338
10.9129	345.267
10.9817	384.161
10.9772	366.482
10.9771	352.338
10.977	338.195
10.9769	327.588
11.0328	370.018
11.0284	352.338
11.0283	339.963
11.0154	327.588
11.0544	387.697
11.0798	366.482
11.0797	352.338
11.0796	339.963
11.1311	359.41
11.1309	345.267
11.118	338.195
11.1607	327.588
11.1435	316.98
11.1861	306.373
11.1817	290.461
11.2077	324.052
11.2332	306.373
11.233	292.229
11.2329	279.854
11.2589	320.516
11.2887	306.373
11.2715	295.765
11.3142	285.158
11.297	274.55
11.3358	316.98
11.3357	302.837
11.3655	285.158
11.3611	269.246
11.4128	320.516
11.4127	306.373
11.4126	292.229
11.4124	278.086
11.4123	265.71
11.4682	299.301
11.4638	281.622
11.4636	267.478
11.4635	256.871
11.5153	306.373
11.5151	292.229
11.515	278.086
11.5149	263.943
11.5148	249.799
11.5403	240.96
11.5663	281.622
11.5662	267.478
11.5661	255.103
11.6176	278.086
11.6175	263.943
11.6173	249.799
11.6471	236.834
11.6688	271.014
11.6687	256.871
11.699	299.301
11.6946	281.622
11.6985	242.728
11.6813	232.12
11.7243	263.943
11.7455	242.728
11.7454	228.584
11.7586	271.014
11.7713	256.871
11.8011	242.728
11.7967	226.816
11.8226	260.407
11.8524	243.906
11.8351	228.584
11.8994	249.799
11.8993	235.656
11.9248	221.513
11.9247	210.905
11.9551	263.943
11.9507	246.263
11.9506	232.12
11.9768	295.765
11.9767	281.622
12.0064	263.943
12.002	246.263
12.0019	232.12
12.0579	285.158
12.0535	267.478
12.0406	256.871
12.0404	242.728
12.0403	232.12
12.1052	313.444
12.105	299.301
12.1049	285.158
12.1048	271.014
12.1047	258.639
12.1607	313.444
12.1563	295.765
12.1562	281.622
12.1433	271.014
12.1431	256.871
12.212	306.373
12.2075	288.693
12.1946	281.622
12.2591	324.052
12.259	309.908
12.2589	295.765
12.2588	281.622
12.2459	274.55
12.2973	292.229
12.31	278.086
12.3099	263.943
12.3098	249.799
12.3613	281.622
12.3612	267.478
12.3611	255.103
12.3482	246.263
12.4125	271.014
12.4124	256.871
12.4123	242.728
12.4378	233.888
12.4638	263.943
12.4636	249.799
12.4934	235.656
12.489	217.977
12.515	256.871
12.5277	242.728
12.5404	228.584
12.5403	214.441
12.5401	200.297
12.5917	235.656
12.5916	221.513
12.5915	209.137
12.6213	194.404
12.6472	228.584
12.6428	210.905
12.6942	225.048
12.6941	210.905
12.694	198.53
12.7327	221.513
12.7454	207.369
12.7452	193.226
12.7323	182.618
12.8009	200.297
12.7837	189.69
12.8224	221.513
12.8522	207.369
12.8478	189.69
12.9036	221.513
12.8992	203.833
12.8863	193.226
12.9506	214.441
12.9505	200.297
12.9375	189.69
13.002	232.12
13.0019	217.977
13.0018	207.369
13.0577	242.728
13.0533	225.048
13.0403	214.441
13.0402	200.297
13.109	242.728
13.1045	225.048
13.1044	212.673
13.1561	256.871
13.156	242.728
13.1559	228.584
13.1686	217.977
13.2075	271.014
13.2074	256.871
13.2073	242.728
13.2072	228.584
13.2631	271.014
13.2587	253.335
13.2586	240.96
13.3145	285.158
13.3101	269.246
13.2972	260.407
13.3658	285.158
13.3614	269.246
13.3876	334.659
13.3875	320.516
13.3874	306.373
13.4129	293.997
13.3999	278.086
13.4392	362.946
13.439	348.803
13.4389	334.659
13.4388	320.516
13.4387	306.373
13.4642	297.533
13.4945	341.731
13.4901	324.052
13.49	309.908
13.5198	294.586
13.5461	370.018
13.5416	352.338
13.5415	338.195
13.5414	324.052
13.5413	309.908
13.554	295.765
13.5803	370.018
13.5801	355.874
13.5928	341.731
13.5927	327.588
13.6444	370.018
13.6442	355.874
13.6441	341.731
13.6312	331.123
13.6704	412.448
13.6703	398.304
13.6701	384.161
13.6961	423.055
13.6999	370.018
13.6827	355.874
13.7259	405.376
13.7215	387.697
13.7346	426.591
13.7341	370.018
13.734	359.41
13.773	412.448
13.7729	398.304
13.7727	385.929
13.7987	426.591
13.8285	412.448
13.8241	394.768
13.824	380.625
13.8239	368.25
13.811	359.41
13.8502	447.806
13.8501	433.663
13.8799	419.519
13.8755	401.84
13.8754	391.233
13.9014	437.199
13.9312	419.519
13.9268	401.84
13.9139	394.768
13.9571	454.878
13.9527	437.199
13.9825	419.519
13.9781	403.608
14.0041	451.342
14.004	437.199
14.0295	415.984
14.0166	408.912
14.0549	398.304
14.0548	384.161
14.0807	412.448
14.1062	398.304
14.1061	384.161
14.106	370.018
14.1059	355.874
14.1447	398.304
14.1574	380.625
14.1572	366.482
14.1444	359.41
14.1827	348.803
14.2085	359.41
14.2339	338.195
14.2338	324.052
14.2209	316.98
14.2593	306.373
14.2592	295.765
14.2897	362.946
14.2853	345.267
14.2852	331.123
14.285	316.98
14.3148	299.301
14.2976	288.693
14.3239	362.946
14.3238	348.803
14.3237	334.659
14.3364	320.516
14.3662	306.373
14.3617	290.461
14.4176	320.516
14.4132	304.605
14.4002	292.229
14.4646	320.516
14.4645	306.373
14.4643	292.229
14.4642	279.854
14.4903	331.123
14.5158	313.444
14.5157	299.301
14.5156	285.158
14.5154	271.014
14.5153	260.407
14.5671	309.908
14.5669	295.765
14.5668	281.622
14.5667	267.478
14.5538	260.407
14.6227	313.444
14.6182	295.765
14.6181	281.622
14.6052	274.55
14.6697	309.908
14.6695	295.765
14.6694	283.39
14.6565	274.55
14.7208	295.765
14.7207	281.622
14.7206	267.478
14.7077	260.407
14.7721	292.229
14.772	278.086
14.7718	263.943
14.7717	249.799
14.7716	239.192
14.8021	306.373
14.8276	286.336
14.8104	271.014
14.8103	260.407
14.8491	306.373
14.8789	292.229
14.8745	274.55
14.8616	267.478
14.9261	313.444
14.926	299.301
14.9259	285.158
14.9258	271.014
14.9774	309.908
14.9773	295.765
14.9771	281.622
15.0287	306.373
15.0285	292.229
15.0544	320.516
15.0842	306.373
15.0798	288.693
15.1316	348.803
15.1315	334.659
15.1314	320.516
15.1312	306.373
15.1311	292.229
15.1567	283.39
15.1869	313.444
15.1824	297.533
15.2382	320.516
15.2338	304.605
15.2209	295.765
15.2598	341.731
15.2725	327.588
15.2852	313.444
15.285	299.301
15.3148	286.336
[truncated: 3,827 more rows]

## Sheet: SG-06-Glycolated
2Theta	Counts (I)
3.33213	2466.68
3.3277	2448.56
3.32757	2434.06
3.32744	2419.56
3.32731	2405.07
3.32718	2390.57
3.32706	2376.08
3.32693	2361.58
3.31404	2354.33
3.35392	2513.79
3.35379	2499.29
3.35366	2484.8
3.38342	2466.68
3.37899	2448.56
3.37886	2434.06
3.37873	2419.56
3.3786	2405.07
3.37847	2390.57
3.37835	2376.08
3.36543	2365.2
3.36533	2354.33
3.39216	2488.42
3.43465	2459.43
3.43021	2441.31
3.43008	2426.81
3.42996	2412.32
3.42983	2397.82
3.4297	2383.32
3.42959	2370.64
3.45659	2524.66
3.45647	2510.16
3.45634	2495.67
3.45621	2481.17
3.48249	2553.65
3.48237	2539.16
3.48173	2466.68
3.4816	2452.18
3.48147	2437.68
3.48134	2423.19
3.48122	2408.69
3.48109	2394.2
3.48096	2379.7
3.48083	2365.2
3.49506	2524.66
3.49493	2510.16
3.5076	2492.04
3.50747	2477.55
3.53723	2459.43
3.53279	2441.31
3.53267	2426.81
3.53254	2412.32
3.53241	2397.82
3.53228	2383.32
3.53215	2368.83
3.51927	2361.58
3.5461	2495.67
3.55876	2477.55
3.58424	2459.43
3.58412	2444.93
3.58399	2430.44
3.58386	2415.94
3.58373	2401.44
3.5836	2386.95
3.58348	2372.45
3.58335	2357.96
3.57043	2347.08
3.64013	2495.67
3.63569	2477.55
3.63557	2463.05
3.63544	2448.56
3.63531	2434.06
3.63518	2419.56
3.63505	2405.07
3.62214	2394.2
3.62204	2383.32
3.68772	2560.9
3.68759	2546.4
3.68746	2531.91
3.68734	2517.41
3.68721	2502.92
3.68708	2488.42
3.68695	2473.92
3.674	2459.43
3.67387	2444.93
3.67375	2430.44
3.67362	2415.94
3.67349	2401.44
3.7258	2517.41
3.72568	2502.92
3.73834	2484.8
3.73821	2470.3
3.73808	2455.8
3.72516	2444.93
3.794	2495.67
3.78957	2477.55
3.78944	2463.05
3.78934	2452.18
3.81984	2517.41
3.8414	2539.16
3.84102	2495.67
3.84089	2481.17
3.84076	2466.68
3.84063	2452.18
3.8405	2437.68
3.84038	2423.19
3.84025	2408.69
3.84012	2394.2
3.83999	2379.7
3.83988	2367.02
3.86692	2524.66
3.86679	2510.16
3.8932	2597.14
3.89307	2582.64
3.89295	2568.15
3.89282	2553.65
3.89269	2539.16
3.89231	2495.67
3.89218	2481.17
3.89207	2468.49
3.8791	2452.18
3.87897	2437.68
3.87884	2423.19
3.87872	2408.69
3.87859	2394.2
3.87846	2379.7
3.87836	2368.83
3.91894	2608.01
3.92248	2524.66
3.91805	2506.54
3.9444	2586.27
3.94427	2571.77
3.94414	2557.28
3.94401	2542.78
3.94781	2488.42
3.94337	2470.3
3.94326	2457.62
3.93036	2448.56
3.9695	2524.66
3.96937	2510.16
3.99591	2611.64
3.99578	2597.14
3.99565	2582.64
3.99553	2568.15
3.9954	2553.65
3.99527	2539.16
3.99489	2495.67
3.99476	2481.17
3.99463	2466.68
3.9945	2452.18
4.02207	2669.62
4.02194	2655.12
4.02181	2640.63
4.02168	2626.13
4.00797	2524.66
4.00784	2510.16
4.05148	2611.64
4.04704	2593.52
4.04691	2579.02
4.03399	2568.15
4.07342	2676.87
4.07329	2662.37
4.07317	2647.88
4.07304	2633.38
4.09919	2691.36
4.09856	2618.88
4.0856	2604.39
4.08548	2589.89
4.08535	2575.4
4.12522	2734.85
4.1251	2720.36
4.12497	2705.86
4.12471	2676.87
4.12458	2662.37
4.12446	2647.88
4.12433	2633.38
4.15049	2691.36
4.14985	2618.88
4.14972	2604.39
4.14959	2589.89
4.14948	2577.21
4.18092	2749.35
4.17648	2731.23
4.17635	2716.73
4.17623	2702.24
4.16318	2676.87
4.16305	2662.37
4.16292	2647.88
4.1628	2633.38
4.20286	2814.58
4.20273	2800.08
4.20261	2785.59
4.20248	2771.09
4.18892	2687.74
4.23227	2756.6
4.22784	2738.48
4.22771	2723.98
4.22758	2709.48
4.22747	2696.8
4.25435	2836.32
4.25422	2821.83
4.25409	2807.33
4.25396	2792.84
4.25383	2778.34
4.28363	2763.84
4.27919	2745.72
4.27906	2731.23
4.27894	2716.73
4.27881	2702.24
4.27868	2687.74
4.27857	2675.06
4.30608	2887.06
4.30596	2872.57
4.30583	2858.07
4.3057	2843.57
4.30557	2829.08
4.30544	2814.58
4.30532	2800.08
4.30519	2785.59
4.33224	2945.05
4.33211	2930.55
4.33198	2916.05
4.33186	2901.56
4.31788	2771.09
4.31775	2756.6
4.35865	3032.02
4.35852	3017.53
4.3584	3003.03
4.35827	2988.53
4.35814	2974.04
4.35801	2959.54
4.38896	3075.51
4.38452	3057.39
4.38439	3042.89
4.37071	2945.05
4.37061	2934.17
4.41052	3097.25
4.40988	3024.77
4.40975	3010.28
4.40962	2995.78
4.40951	2983.1
4.39654	2966.79
4.43629	3111.75
4.43604	3082.76
4.43591	3068.26
4.43578	3053.77
4.42283	3039.27
4.46634	3126.25
4.46608	3097.25
4.49256	3191.48
4.48813	3173.36
4.488	3158.86
4.48787	3144.37
4.47444	3075.51
4.47434	3064.64
4.50053	3126.25
4.50044	3115.37
4.54079	3329.19
4.54066	3314.69
4.54054	3300.2
4.54041	3285.7
4.54028	3271.21
4.54015	3256.71
4.54002	3242.21
4.5399	3227.72
4.53977	3213.22
4.53964	3198.73
4.53951	3184.23
4.53938	3169.73
4.53926	3155.24
4.53914	3142.55
4.57097	3358.18
4.56653	3340.06
4.59719	3423.41
4.59275	3405.29
4.59263	3390.8
4.5925	3376.3
4.5792	3321.94
4.57907	3307.45
4.57894	3292.95
4.57881	3278.45
4.61901	3474.15
4.61888	3459.66
4.61875	3445.16
4.64982	3575.62
4.64539	3557.5
4.64526	3543.01
4.64513	3528.51
4.645	3514.02
4.64488	3499.52
4.64475	3485.02
4.63148	3434.29
4.67591	3626.36
4.67148	3608.24
4.67135	3593.74
4.69824	3735.08
4.69812	3720.58
4.69799	3706.09
4.69786	3691.59
4.69773	3677.1
4.6976	3662.6
4.69748	3648.1
4.69684	3575.62
4.72402	3749.58
4.71017	3633.61
4.71004	3619.11
4.70992	3604.62
4.70979	3590.12
4.75069	3865.54
4.75056	3851.05
4.75043	3836.55
4.7503	3822.06
4.75017	3807.56
4.75005	3793.06
4.74992	3778.57
4.74979	3764.07
4.73671	3735.08
4.73658	3720.58
4.73646	3706.09
4.73633	3691.59
4.7362	3677.1
4.7361	3666.22
4.78112	3923.53
4.77668	3905.41
4.77655	3890.91
4.77643	3876.42
4.80798	4061.24
4.80354	4043.12
4.80341	4028.62
4.80329	4014.13
4.80316	3999.63
4.80303	3985.14
4.8029	3970.64
4.80278	3956.14
4.80265	3941.65
4.80619	3858.3
4.80175	3840.18
4.80162	3825.68
4.80151	3813
4.78861	3803.94
4.83381	4082.99
4.81531	3923.53
4.81518	3909.03
4.81505	3894.54
4.81493	3880.04
4.86003	4148.22
4.8556	4130.1
4.85547	4115.6
4.85534	4101.11
4.84217	4061.24
4.84204	4046.74
4.84191	4032.25
4.84179	4017.75
4.84166	4003.26
4.88741	4343.91
4.88297	4325.79
4.88284	4311.3
4.88272	4296.8
4.88259	4282.31
4.88246	4267.81
4.88233	4253.31
4.88221	4238.82
4.88208	4224.32
4.88195	4209.83
4.88182	4195.33
4.88169	4180.83
4.88157	4166.34
4.86801	4082.99
4.91427	4481.63
4.90983	4463.51
4.90971	4449.01
4.90958	4434.51
4.90945	4420.02
4.90932	4405.52
4.90919	4391.03
4.90907	4376.53
4.90894	4362.03
4.9216	4343.91
4.92147	4329.42
4.92134	4314.92
4.92122	4300.43
4.92112	4289.55
4.96263	4633.83
4.9625	4619.34
4.96237	4604.84
4.96224	4590.35
4.96211	4575.85
4.96199	4561.35
4.96186	4546.86
4.96173	4532.36
4.9616	4517.87
4.96148	4503.37
4.96135	4488.87
4.96122	4474.38
4.96109	4459.88
4.96098	4447.2
4.94801	4430.89
4.94789	4416.39
4.94776	4401.9
4.94763	4387.4
4.99306	4691.82
4.98862	4673.7
4.9885	4659.2
4.98837	4644.71
5.01889	4713.56
5.01813	4626.59
5.01369	4608.47
5.01356	4593.97
5.01344	4579.47
5.01331	4564.98
5.00042	4557.73
5.04627	4909.26
5.04183	4891.14
5.0417	4876.64
5.04158	4862.15
5.04145	4847.65
5.04132	4833.16
5.04119	4818.66
5.04106	4804.16
5.04094	4789.67
5.04081	4775.17
5.04068	4760.68
5.04055	4746.18
5.04043	4731.68
5.04436	4693.03
5.02712	4677.32
5.027	4662.83
5.02687	4648.33
5.06834	4988.99
5.06821	4974.49
5.06808	4960
5.06796	4945.5
5.06783	4931
5.05309	4713.56
5.0998	5162.94
5.09536	5144.82
5.09523	5130.32
5.09511	5115.83
5.09498	5101.33
5.09485	5086.84
5.09472	5072.34
5.09459	5057.84
5.09447	5043.35
5.09434	5028.85
5.09421	5014.36
5.09408	4999.86
5.09763	4917.72
5.0804	4902.01
5.08027	4887.52
5.08014	4873.02
5.08004	4862.15
5.12755	5402.13
5.12312	5384.01
5.12299	5369.51
5.12286	5355.01
5.12273	5340.52
5.12261	5326.02
5.12248	5311.53
5.12235	5297.03
5.12222	5282.53
5.12209	5268.04
5.12197	5253.54
5.12184	5239.04
5.12171	5224.55
5.12158	5210.05
5.12145	5195.56
5.12133	5181.06
5.10674	4981.74
5.10662	4967.24
5.10649	4952.75
5.10636	4938.25
5.1501	5536.21
5.14998	5521.72
5.14985	5507.22
5.14972	5492.73
5.14959	5478.23
5.14947	5463.73
5.14934	5449.24
5.14921	5434.74
5.14908	5420.25
5.13399	5162.94
5.13386	5148.44
5.13373	5133.95
5.1336	5119.45
5.13348	5104.96
5.13335	5090.46
5.13322	5075.96
5.13309	5061.47
5.13297	5046.97
5.13284	5032.48
5.13271	5017.98
5.17884	5402.13
5.17441	5384.01
5.17428	5369.51
5.17415	5355.01
5.17402	5340.52
5.1739	5326.02
5.17377	5311.53
5.17364	5297.03
5.17351	5282.53
5.1734	5269.85
5.20596	5568.83
5.20152	5550.71
5.2014	5536.21
5.20127	5521.72
5.20114	5507.22
5.20101	5492.73
5.20088	5478.23
5.18797	5467.36
5.18784	5452.86
5.18771	5438.37
5.18758	5423.87
5.22765	5605.07
5.22752	5590.57
5.2591	5779.02
5.25467	5760.9
5.25454	5746.41
5.25441	5731.91
5.25428	5717.41
5.25416	5702.92
5.25403	5688.42
5.2539	5673.93
5.25377	5659.43
5.25365	5644.93
5.25352	5630.44
5.25339	5615.94
5.25307	5579.7
5.28067	5800.77
5.26605	5597.82
5.31148	5902.24
5.30705	5884.12
5.30692	5869.62
5.30679	5855.13
5.30666	5840.63
5.30653	5826.13
5.30641	5811.64
5.31046	5786.27
5.30602	5768.15
5.30591	5755.47
5.29301	5746.41
5.3333	5952.98
5.33317	5938.48
5.33304	5923.98
5.36283	5909.49
5.34564	5898.61
5.38893	5960.22
5.38449	5942.1
5.38437	5927.61
5.38829	5887.74
5.38385	5869.62
5.38373	5855.13
5.3836	5840.63
5.38347	5826.13
5.38334	5811.64
5.38321	5797.14
5.38309	5782.65
5.38296	5768.15
5.38283	5753.65
5.36994	5746.41
5.41412	5909.49
5.41259	5735.53
5.40816	5717.41
5.40803	5702.92
5.4079	5688.42
5.40777	5673.93
5.40764	5659.43
5.40752	5644.93
5.40739	5630.44
5.40726	5615.94
5.40713	5601.45
5.42312	5960.22
5.42299	5945.73
5.42287	5931.23
5.42248	5887.74
5.42235	5873.25
5.42223	5858.75
5.4221	5844.25
5.42197	5829.76
5.42184	5815.26
5.42171	5800.77
5.42159	5786.27
5.42146	5771.77
5.42133	5757.28
5.43689	5583.33
5.44614	5663.05
5.44602	5648.56
5.44589	5634.06
5.44576	5619.57
5.44563	5605.07
5.45807	5561.58
5.45794	5547.09
5.45782	5532.59
5.45769	5518.09
5.45756	5503.6
5.45743	5489.1
5.4573	5474.61
5.45718	5460.11
5.45705	5445.61
5.45692	5431.12
5.45679	5416.62
5.47115	5590.57
5.47102	5576.08
5.48658	5402.13
5.48215	5384.01
5.48202	5369.51
5.48189	5355.01
5.48177	5340.52
5.48164	5326.02
5.48151	5311.53
5.48138	5297.03
5.48125	5282.53
5.48113	5268.04
5.46824	5260.79
5.49596	5496.35
5.49584	5481.85
5.49571	5467.36
5.49558	5452.86
5.49545	5438.37
5.49532	5423.87
5.50661	5249.92
5.50648	5235.42
5.50636	5220.92
5.50623	5206.43
5.5061	5191.93
5.50597	5177.44
5.50584	5162.94
5.50572	5148.44
5.50559	5133.95
5.50546	5119.45
5.50533	5104.96
5.5052	5090.46
5.50508	5075.96
5.50495	5061.47
5.50482	5046.97
5.50469	5032.48
5.53021	5017.98
5.53008	5003.48
5.52995	4988.99
5.52983	4974.49
5.5297	4960
5.52957	4945.5
5.52944	4931
5.52932	4916.51
5.52919	4902.01
5.52906	4887.52
5.52893	4873.02
5.5288	4858.52
5.52868	4844.03
5.52855	4829.53
5.52842	4815.04
5.52829	4800.54
5.52816	4786.04
5.52805	4773.36
5.54418	5148.44
5.54406	5133.95
5.54393	5119.45
5.5438	5104.96
5.54367	5090.46
5.54354	5075.96
5.54342	5061.47
5.54329	5046.97
5.54316	5032.48
5.55355	4757.05
5.55343	4742.56
5.56766	4902.01
5.56753	4887.52
5.5674	4873.02
5.56727	4858.52
5.56714	4844.03
5.56702	4829.53
5.56689	4815.04
5.56676	4800.54
5.57942	4782.42
5.57929	4767.92
5.58322	4728.06
5.57878	4709.94
5.57865	4695.44
5.57853	4680.95
5.5784	4666.45
5.57827	4651.95
5.57814	4637.46
5.57802	4622.96
5.57789	4608.47
5.57776	4593.97
5.57763	4579.47
5.5775	4564.98
5.57738	4550.48
5.57725	4535.99
5.57712	4521.49
5.57699	4506.99
5.57686	4492.5
5.57674	4478
5.57661	4463.51
5.57648	4449.01
5.57635	4434.51
5.59196	4749.8
5.60611	4416.39
5.60168	4398.27
5.60155	4383.78
5.60142	4369.28
5.58854	4362.03
5.61498	4452.63
5.61485	4438.14
5.62691	4351.16
5.62678	4336.67
5.62665	4322.17
5.62652	4307.67
5.6264	4293.18
5.62627	4278.68
5.62614	4264.19
5.62601	4249.69
5.62588	4235.19
5.62576	4220.7
5.62563	4206.2
5.6255	4191.71
5.62537	4177.21
5.62524	4162.71
5.65504	4148.22
5.6506	4130.1
5.65047	4115.6
5.65035	4101.11
5.65022	4086.61
5.65009	4072.11
5.64996	4057.62
5.64983	4043.12
5.64971	4028.62
5.64958	4014.13
5.64945	3999.63
5.63656	3992.38
5.6639	4184.46
5.66378	4169.96
5.67494	3981.51
5.67481	3967.02
5.67468	3952.52
5.67455	3938.02
5.67442	3923.53
5.6743	3909.03
5.69981	3894.54
5.69969	3880.04
5.69956	3865.54
5.69943	3851.05
5.6993	3836.55
5.69917	3822.06
5.69905	3807.56
5.69892	3793.06
5.69879	3778.57
5.69866	3764.07
5.69854	3749.58
5.69841	3735.08
5.69828	3720.58
5.69815	3706.09
5.69802	3691.59
5.6979	3677.1
5.69778	3664.41
5.72756	3648.1
5.72313	3629.98
5.723	3615.49
5.72287	3600.99
5.70998	3593.74
5.73681	3727.83
5.73668	3713.34
5.73656	3698.84
5.73643	3684.34
5.7363	3669.85
5.74835	3582.87
5.74823	3568.38
5.7481	3553.88
5.74797	3539.38
5.74784	3524.89
5.74772	3510.39
5.74759	3495.9
5.74746	3481.4
5.74733	3466.9
5.7472	3452.41
5.74708	3437.91
5.74695	3423.41
5.74682	3408.92
5.74669	3394.42
5.76131	3597.37
5.77221	3379.93
5.77208	3365.43
5.77195	3350.93
5.77183	3336.44
5.7717	3321.94
5.77157	3307.45
5.77144	3292.95
5.78554	3437.91
5.78542	3423.41
5.78529	3408.92
5.78516	3394.42
5.80123	3278.45
5.7968	3260.33
5.79667	3245.84
5.79654	3231.34
5.79642	3216.85
5.79629	3202.35
5.79616	3187.85
5.79603	3173.36
5.7959	3158.86
5.79578	3144.37
5.79565	3129.87
5.79552	3115.37
5.79539	3100.88
5.78251	3093.63
5.81049	3358.18
5.81036	3343.69
5.81023	3329.19
5.8101	3314.69
5.80997	3300.2
5.82515	3082.76
5.82072	3064.64
5.82059	3050.14
5.82046	3035.65
5.82033	3021.15
5.82021	3006.65
5.82008	2992.16
5.81995	2977.66
5.83466	3191.48
5.83453	3176.98
5.8344	3162.49
5.83428	3147.99
5.83415	3133.49
5.83402	3119
5.83389	3104.5
5.84544	2959.54
5.8589	3032.02
5.85877	3017.53
5.85864	3003.03
5.85851	2988.53
5.85839	2974.04
5.87095	2945.05
5.87082	2930.55
5.8707	2916.05
5.87057	2901.56
5.87044	2887.06
5.87031	2872.57
5.87019	2858.07
5.87006	2843.57
5.86993	2829.08
5.8698	2814.58
5.86967	2800.08
5.8839	2959.54
5.89519	2785.59
5.89506	2771.09
5.89494	2756.6
5.89481	2742.1
5.89468	2727.6
5.89455	2713.11
5.89444	2700.42
5.90865	2858.07
5.90853	2843.57
5.9084	2829.08
5.90827	2814.58
5.90814	2800.08
5.92422	2684.12
5.91978	2666
5.91965	2651.5
5.91953	2637
5.9194	2622.51
5.91927	2608.01
5.90638	2600.76
5.94475	2589.89
5.94463	2575.4
5.9445	2560.9
5.94437	2546.4
5.94424	2531.91
5.94412	2517.41
5.94399	2502.92
5.94386	2488.42
5.95809	2647.88
5.95796	2633.38
5.95783	2618.88
5.95771	2604.39
5.96938	2473.92
5.96925	2459.43
5.96912	2444.93
5.96899	2430.44
5.96887	2415.94
5.96874	2401.44
5.96861	2386.95
5.9685	2374.26
5.99525	2499.29
5.99512	2484.8
5.99827	2357.96
5.99384	2339.84
5.99371	2325.34
5.99358	2310.84
5.9807	2303.6
6.00778	2466.68
6.00765	2452.18
6.00752	2437.68
6.0074	2423.19
6.02009	2408.69
6.01996	2394.2
6.01984	2379.7
6.01907	2292.72
6.01894	2278.23
6.01883	2265.54
6.03253	2365.2
6.0324	2350.71
6.03227	2336.21
6.03215	2321.72
6.03202	2307.22
6.04433	2249.24
6.0442	2234.74
6.04407	2220.24
6.04395	2205.75
6.04383	2193.06
6.05728	2263.73
6.06934	2176.75
6.06921	2162.26
6.06908	2147.76
6.06895	2133.27
6.06882	2118.77
6.0687	2104.27
6.06858	2091.59
6.08241	2205.75
6.08229	2191.25
6.09409	2075.28
6.09396	2060.79
6.09385	2048.1
6.10716	2104.27
6.11983	2086.15
6.12362	2031.79
6.11919	2013.67
6.11906	1999.18
6.11893	1984.68
6.1188	1970.19
6.11868	1955.69
6.10579	1948.44
6.13249	2068.03
6.13236	2053.54
6.14843	1937.57
6.13124	1926.7
6.15781	2031.79
6.15769	2017.3
6.15756	2002.8
6.15743	1988.31
6.1573	1973.81
6.15718	1959.31
6.16961	1915.83
6.16949	1901.33
6.16936	1886.83
6.16923	1872.34
6.1691	1857.84
6.16899	1845.16
6.18269	1944.82
6.18256	1930.32
6.19877	1828.85
6.19433	1810.73
6.1942	1796.23
6.18132	1788.99
6.20763	1865.09
6.20751	1850.59
6.21969	1778.11
6.21956	1763.62
6.21943	1749.12
6.21931	1734.63
6.21918	1720.13
6.21907	1707.45
6.24884	1691.14
6.24441	1673.02
6.24428	1658.52
6.24415	1644.03
6.24402	1629.53
6.2439	1615.03
6.23101	1607.79
6.26938	1596.91
6.26925	1582.42
6.26913	1567.92
6.269	1553.42
6.2689	1542.55
6.28272	1654.9
6.28259	1640.4
6.28246	1625.91
6.29515	1611.41
6.30785	1596.91
6.32051	1578.79
6.32038	1564.3
6.32026	1549.8
6.32013	1535.3
6.32	1520.81
6.31987	1506.31
6.31974	1491.82
6.31962	1477.32
6.31949	1462.82
6.31936	1448.33
6.34485	1430.21
6.34472	1415.71
6.35818	1488.19
6.37087	1473.7
6.37075	1459.2
6.37062	1444.7
6.37025	1403.03
6.3961	1426.58
6.39598	1412.09
6.40003	1386.72
6.39559	1368.6
6.3955	1357.73
6.43448	1415.71
6.43435	1401.22
6.44701	1383.1
6.44688	1368.6
6.44676	1354.1
6.44663	1339.61
6.4465	1325.11
6.44637	1310.62
6.44624	1296.12
6.44612	1281.62
6.44599	1267.13
6.4331	1259.88
6.47575	1249.01
6.45855	1238.14
6.48449	1270.75
6.5012	1227.26
6.48401	1216.39
6.52273	1245.38
6.52665	1205.52
6.52222	1187.4
6.52209	1172.9
6.52196	1158.41
6.50908	1151.16
6.53539	1227.26
6.55172	1140.29
6.54729	1122.17
6.57769	1176.53
6.57325	1158.41
6.59874	1140.29
6.59861	1125.79
6.59848	1111.3
6.61182	1169.28
6.61169	1154.78
6.624	1096.8
6.62387	1082.3
6.62375	1067.81
6.62362	1053.31
6.62349	1038.82
6.67526	1093.18
6.67513	1078.68
6.675	1064.18
6.67488	1049.69
6.67475	1035.19
6.66186	1027.94
6.70023	1017.07
6.70012	1004.39
6.7261	1042.44
6.72597	1027.94
6.7299	988.079
6.72546	969.959
6.72533	955.463
6.75146	1009.82
6.75082	937.343
6.76415	995.327
6.77685	980.831
6.77672	966.335
6.77659	951.839
6.80216	942.779
6.81525	973.583
6.82792	955.463
6.83197	930.095
6.82753	911.975
6.85302	893.855
6.85289	879.359
6.85276	864.863
6.85267	853.991
6.88306	908.351
6.90424	886.607
6.90412	872.111
6.90399	857.615
6.89107	846.743
6.93011	911.975
6.92999	897.479
6.95547	879.359
6.95534	864.863
6.95521	850.367
6.9551	837.682
6.98163	937.343
6.9815	922.847
6.98137	908.351
6.98124	893.855
6.9806	821.374
6.98048	806.878
6.98035	792.382
6.98024	779.698
6.99394	879.359
7.0066	861.239
7.00647	846.743
7.00635	832.246
7.03612	815.334
7.05792	864.863
7.0578	850.367
7.05767	835.87
7.0837	879.359
7.08318	821.374
7.08306	806.878
7.10921	864.863
7.10909	850.367
7.10896	835.87
7.1607	886.607
7.16057	872.111
7.16044	857.615
7.16031	843.119
7.16018	828.622
7.16006	814.126
7.18985	799.63
7.18541	781.51
7.18532	770.638
7.2162	879.359
7.21176	861.239
7.21163	846.743
7.21151	832.246
7.21138	817.75
7.23691	805.066
7.25026	864.863
7.26296	850.367
7.26283	835.87
7.2627	821.374
7.28822	806.878
7.2753	796.006
7.31852	850.367
7.31409	832.246
7.30117	821.374
7.34005	868.487
7.36554	850.367
7.36541	835.87
7.36528	821.374
7.39182	922.847
7.39169	908.351
7.39157	893.855
7.39144	879.359
7.39131	864.863
7.41683	850.367
7.4167	835.87
7.41657	821.374
7.41646	808.69
7.44196	792.382
7.44183	777.886
7.42892	767.014
7.46809	846.743
7.46796	832.246
7.46783	817.75
7.4677	803.254
7.49319	785.134
7.49308	772.45
7.50652	843.119
7.50639	828.622
7.51906	810.502
7.51893	796.006
7.54441	777.886
7.54429	763.39
7.54419	752.518
7.57032	806.878
7.57019	792.382
7.58288	777.886
7.58275	763.39
7.59542	745.27
7.59529	730.774
7.59518	718.09
7.64687	763.39
7.64674	748.894
7.64661	734.398
7.64648	719.902
7.64637	707.218
7.67187	690.91
7.67175	676.414
7.70218	734.398
7.69774	716.278
7.69763	703.594
7.7365	748.894
7.74916	730.774
7.74903	716.278
7.74891	701.782
7.74878	687.286
7.74865	672.79
7.73576	665.542
7.7876	727.15
7.80029	712.654
7.80016	698.158
7.80004	683.662
7.82562	676.414
7.85579	705.406
7.85136	687.286
7.86405	672.79
7.903	727.15
7.90287	712.654
7.90274	698.158
7.90262	683.662
7.92877	741.646
7.92813	669.166
7.92801	654.67
7.92791	643.798
7.94147	727.15
7.94134	712.654
7.94121	698.158
7.95391	683.662
7.97942	669.166
7.9793	654.67
8.00558	727.15
8.00545	712.654
8.00533	698.158
8.0052	683.662
8.03499	669.166
8.03055	651.046
8.05681	719.902
8.05668	705.406
8.05655	690.91
8.05607	636.55
8.08271	748.894
8.08258	734.398
8.08209	678.226
8.06912	661.918
8.06899	647.422
8.10848	763.39
8.1081	719.902
8.10797	705.406
8.10786	692.722
8.13827	748.894
8.13384	730.774
8.15984	770.638
8.1465	712.654
8.14641	701.782
8.19001	799.63
8.18558	781.51
8.18963	756.142
8.18519	738.022
8.17227	727.15
8.21154	817.75
8.2413	799.63
8.23687	781.51
8.23674	767.014
8.23663	754.33
8.22369	741.646
8.2236	730.774
8.28857	828.622
8.28845	814.126
8.28832	799.63
8.28819	785.134
8.28808	772.45
8.31888	872.111
8.31444	853.991
8.31431	839.495
8.34471	893.855
8.32698	821.374
8.32688	810.502
8.35307	872.111
8.35294	857.615
8.35281	843.119
8.35272	832.246
8.39613	908.351
8.39171	892.043
8.37881	882.983
8.44845	1024.32
8.44401	1006.2
8.44388	991.703
8.44376	977.207
8.44363	962.711
8.4435	948.215
8.44337	933.719
8.44324	919.223
8.44312	904.727
8.443	892.043
8.4301	882.983
8.49514	988.079
8.49501	973.583
8.49489	959.087
8.49477	946.403
8.48181	930.095
8.52532	1017.07
8.52088	998.951
8.53355	980.831
8.53342	966.335
8.53332	955.463
8.57661	1017.07
8.57219	1000.76
8.59827	1049.69
8.59814	1035.19
8.6279	1017.07
8.62346	998.951
8.62334	984.455
8.62321	969.959
8.61032	962.711
8.65374	1038.82
8.65297	951.839
8.64857	937.343
8.67491	1017.07
8.67479	1002.58
8.67466	988.079
8.67453	973.583
8.70094	1060.56
8.70082	1046.06
8.68787	1031.57
8.68723	959.087
8.6871	944.591
8.72684	1089.55
8.72672	1075.06
8.75702	1118.54
8.75259	1100.42
8.75227	1064.18
8.73932	1049.69
8.78311	1169.28
8.77868	1151.16
8.77855	1136.66
8.7781	1085.93
8.80985	1292.5
8.80541	1274.38
8.80528	1259.88
8.80516	1245.38
8.80503	1230.89
8.8049	1216.39
8.80477	1201.9
8.80464	1187.4
8.79121	1118.54
8.79109	1104.05
8.83192	1372.22
8.83179	1357.73
8.83166	1343.23
8.83154	1328.74
8.83141	1314.24
8.86299	1502.69
8.85856	1484.57
8.85843	1470.07
8.8583	1455.58
8.85817	1441.08
8.85804	1426.58
8.85792	1412.09
8.85779	1397.59
8.85768	1384.91
8.8441	1299.74
8.84397	1285.25
8.84388	1274.38
8.88558	1640.4
8.88545	1625.91
8.88532	1611.41
8.88519	1596.91
8.88506	1582.42
8.88494	1567.92
8.88481	1553.42
8.88468	1538.93
8.88455	1524.43
8.91754	1872.34
8.91311	1854.22
8.91298	1839.72
8.91285	1825.23
8.91272	1810.73
8.9126	1796.23
8.91247	1781.74
8.91234	1767.24
8.91221	1752.75
8.91208	1738.25
8.91196	1723.75
8.91183	1709.26
8.9117	1694.76
8.91157	1680.27
8.91145	1665.77
8.91133	1653.09
8.89728	1513.56
8.94013	2010.05
8.94	1995.55
8.93987	1981.06
8.93974	1966.56
8.93962	1952.07
8.93949	1937.57
8.93936	1923.07
8.93923	1908.58
8.93911	1894.08
8.96667	2111.52
8.96654	2097.03
8.96641	2082.53
8.96629	2068.03
8.96616	2053.54
8.96603	2039.04
8.9659	2024.55
8.96464	1881.4
8.99139	2006.43
8.99126	1991.93
8.99113	1977.43
8.991	1962.94
8.99088	1948.44
8.99075	1933.95
8.99062	1919.45
8.99049	1904.95
8.99036	1890.46
8.99441	1865.09
8.98998	1846.97
8.98985	1832.47
8.98972	1817.98
8.97684	1810.73
9.01521	1799.86
9.01508	1785.36
9.01495	1770.87
9.01483	1756.37
9.0147	1741.87
9.01457	1727.38
9.01444	1712.88
9.01431	1698.39
9.01419	1683.89
9.01406	1669.39
9.01393	1654.9
9.0138	1640.4
9.01369	1627.72
9.04347	1611.41
9.03903	1593.29
9.0389	1578.79
9.03878	1564.3
9.03865	1549.8
9.03852	1535.3
9.03839	1520.81
9.03826	1506.31
9.03814	1491.82
9.03801	1477.32
9.03788	1462.82
9.02499	1455.58
9.06337	1444.7
9.06324	1430.21
9.06311	1415.71
9.06298	1401.22
9.06285	1386.72
9.06274	1374.04
9.09252	1357.73
9.08808	1339.61
9.08796	1325.11
9.08783	1310.62
9.0877	1296.12
9.08757	1281.62
9.07469	1274.38
9.11306	1263.5
9.11293	1249.01
9.1128	1234.51
9.11271	1223.64
9.12614	1292.5
9.12601	1278
9.16862	1263.5
9.16419	1245.38
9.16406	1230.89
9.16393	1216.39
9.1638	1201.9
9.16368	1187.4
9.16355	1172.9
9.15066	1165.66
9.20269	1249.01
9.20256	1234.51
9.20243	1220.02
9.2023	1205.52
9.20218	1191.02
9.20205	1176.53
9.21471	1158.41
9.21458	1143.91
9.21446	1129.42
9.21433	1114.92
9.25308	1147.54
9.26578	1133.04
9.26565	1118.54
9.26552	1104.05
9.26539	1089.55
9.26527	1075.06
9.26517	1064.18
9.30418	1125.79
9.31688	1111.3
9.31675	1096.8
9.31662	1082.3
9.31649	1067.81
9.31636	1053.31
9.31624	1038.82
9.31614	1027.94
9.35541	1118.54
9.35528	1104.05
9.35515	1089.55
9.36785	1075.06
9.36772	1060.56
9.36759	1046.06
9.36746	1031.57
9.42354	1089.55
9.41911	1071.43
9.41898	1056.94
9.41885	1042.44
9.41872	1027.94
9.44424	1013.45
9.47489	1096.8
9.47046	1078.68
9.47033	1064.18
9.4702	1049.69
9.47008	1035.19
9.46995	1020.7
9.49543	1002.58
9.5089	1075.06
9.50877	1060.56
9.50864	1046.06
9.50851	1031.57
9.52121	1017.07
9.54672	1002.58
9.5466	988.079
9.5725	1017.07
9.57211	973.583
9.57199	959.087
9.59801	1002.58
9.59789	988.079
9.5975	944.591
9.59739	931.907
9.6234	973.583
9.62328	959.087
9.65308	945.799
9.63584	930.095
9.67501	1009.82
9.67489	995.327
9.67476	980.831
9.67465	968.147
9.72637	1017.07
9.72624	1002.58
9.72611	988.079
9.72598	973.583
9.72587	960.899
9.75137	944.591
9.75125	930.095
9.7774	988.079
9.77728	973.583
9.77715	959.087
9.80268	946.403
9.78975	933.719
9.81587	988.079
9.82857	973.583
9.82844	959.087
9.854	950.027
9.88419	980.831
9.87976	962.711
9.88382	938.551
9.90576	1002.58
9.93555	988.079
9.93111	969.959
9.93099	955.463
9.95652	942.779
9.98697	1002.58
9.98253	984.455
9.9824	969.959
9.98228	955.463
10.0085	1020.7
10.0078	942.779
10.034	998.951
10.0338	984.455
10.0209	973.583
10.0208	959.087
10.0853	1002.58
10.0851	988.079
10.085	973.583
10.0849	959.087
10.0848	948.215
10.1371	1060.56
10.1369	1046.06
10.1368	1031.57
10.1367	1017.07
10.1366	1002.58
10.1364	988.079
10.1363	973.583
10.1924	1031.57
10.188	1013.45
10.1878	998.951
10.1877	984.455
10.1748	977.207
10.2132	966.335
10.2131	951.839
10.2001	940.967
10.2396	1053.31
10.2395	1038.82
10.2393	1024.32
10.2392	1011.64
10.2263	995.327
10.2261	980.831
10.291	1067.81
10.2909	1053.31
10.2908	1038.82
10.2906	1024.32
10.2905	1011.64
10.3168	1082.3
10.3466	1067.81
10.3421	1049.69
10.342	1035.19
10.3419	1020.7
10.3418	1006.2
10.3289	998.951
10.3681	1089.55
10.3982	1104.05
10.3979	1075.06
10.3935	1056.94
10.4233	1038.82
10.4493	1089.55
10.4449	1071.43
10.4448	1056.94
10.4487	1017.07
10.4709	1111.3
10.4703	1038.82
10.4699	995.327
10.4698	980.831
10.4697	969.959
10.4836	1096.8
10.4963	1078.68
10.4961	1064.18
10.496	1049.69
10.5001	1024.32
10.4956	1008.01
10.5479	1114.92
10.5478	1100.42
10.5476	1085.93
10.5475	1071.43
10.5474	1056.94
10.5472	1042.44
10.5471	1027.94
10.547	1013.45
10.599	1096.8
10.5989	1082.3
10.5988	1067.81
10.5986	1053.31
10.5985	1038.82
10.5984	1024.32
10.5983	1011.64
10.6238	995.327
10.6236	982.643
10.6498	1035.19
10.6496	1020.7
10.6495	1006.2
10.6534	966.335
10.6622	988.079
10.6789	944.591
10.6744	926.471
10.6743	911.975
10.7041	893.855
10.6996	875.735
10.6995	861.239
10.6994	846.743
10.6993	832.246
10.7248	815.938
10.7553	886.607
10.7509	868.487
10.7507	853.991
10.7506	839.495
10.7505	824.998
10.7895	886.607
10.7894	872.111
10.802	853.991
10.8019	839.495
10.8018	824.998
10.8016	810.502
10.8015	796.006
10.8014	781.51
10.8013	767.014
10.831	748.894
10.8401	814.126
10.84	799.63
10.8399	785.134
10.8526	767.014
10.8565	727.15
10.852	709.03
10.8652	748.894
10.8818	690.91
10.8774	672.79
10.8772	658.294
10.8771	647.422
10.8905	712.654
10.9288	687.286
10.9287	672.79
10.9285	658.294
10.9284	643.798
10.9283	629.302
10.9281	614.806
10.9153	607.558
10.9799	665.542
10.9798	651.046
10.9796	636.55
10.9795	622.054
10.9794	607.558
10.9792	593.062
11.0047	574.942
11.0179	618.43
11.0306	600.31
11.0305	585.814
11.0345	560.446
11.0173	549.574
11.0557	538.702
11.0556	526.017
11.0686	553.198
11.0811	509.709
11.081	497.025
11.107	535.078
11.1068	520.581
11.1108	480.717
11.1366	502.461
11.1449	480.717
11.1576	466.221
11.1575	451.725
11.1574	439.041
11.2089	466.221
11.2088	451.725
11.2087	437.229
11.2085	422.733
11.2084	408.237
11.2083	395.553
11.2348	491.589
11.2347	477.093
11.2473	458.973
11.2472	444.477
11.2599	429.981
11.2598	415.485
11.2596	400.989
11.2724	390.117
11.3112	426.357
11.311	411.861
11.3109	397.365
11.3624	415.485
11.3622	400.989
11.3621	386.493
11.3876	371.997
11.3875	357.501
11.3874	343.005
11.3873	332.133
11.439	379.245
11.4388	364.749
11.4387	350.253
11.4386	337.569
11.49	353.877
11.4899	339.381
11.477	332.133
11.5412	343.005
11.5411	328.509
11.541	314.013
11.5925	335.757
11.5923	321.261
11.6178	306.765
11.6177	294.081
11.6437	332.133
11.6436	317.637
11.6734	301.933
11.695	335.757
11.6949	321.261
11.7204	306.765
11.7203	292.269
11.7202	277.773
11.7073	266.901
11.7463	335.757
11.7462	321.261
11.7717	306.765
11.7716	292.269
11.7715	277.773
11.7848	335.757
11.7847	321.261
11.797	266.901
11.823	303.141
11.8228	288.645
11.8227	275.961
11.8786	314.013
11.8742	295.893
11.8741	281.397
11.8739	266.901
11.8611	259.653
11.9299	314.013
11.9255	295.893
11.9254	283.209
11.9124	270.525
11.9124	259.653
11.9768	299.517
11.9767	285.021
11.9766	274.149
12.0282	314.013
12.0281	299.517
12.028	285.021
12.0279	272.337
12.0837	299.517
12.0792	281.397
12.0791	268.713
12.1305	281.397
12.1304	266.901
12.1303	252.405
12.1174	245.157
12.1558	234.285
12.169	277.773
12.1817	263.277
12.1815	248.781
12.207	234.285
12.2069	219.788
12.2329	259.653
12.2328	245.157
12.2583	232.473
12.2842	263.277
12.2841	248.781
12.2839	219.788
12.3139	234.285
12.3094	208.916
12.361	248.781
12.3609	234.285
12.3608	219.788
12.3479	208.916
12.4165	234.285
12.3993	223.413
12.4419	212.54
12.4375	196.232
12.4636	248.781
12.4635	234.285
12.4933	219.788
12.4889	201.668
12.476	194.42
12.5404	227.037
12.5402	212.54
12.5401	198.044
12.5657	187.172
12.5915	212.54
12.5914	198.044
12.6041	183.548
12.643	234.285
12.6429	219.788
12.6428	205.292
12.6426	192.608
12.6682	179.924
12.6941	205.292
12.6939	190.796
12.7241	219.788
12.7453	198.044
12.7452	187.172
12.7713	237.909
12.7711	223.413
12.771	208.916
12.7965	190.796
12.7964	178.112
12.8225	234.285
12.8224	219.788
12.8223	205.292
12.8478	190.796
12.8477	176.3
12.8737	216.164
12.8735	201.668
12.899	185.36
12.9249	212.54
12.9248	198.044
12.9504	190.796
12.9763	219.788
12.9761	205.292
13.002	234.285
12.9889	194.42
13.0276	219.788
13.0274	205.292
13.0576	234.285
13.053	196.232
13.0788	212.54
13.1047	241.533
13.1046	227.037
13.0915	201.668
13.1301	214.352
13.156	241.533
13.1559	227.037
13.186	256.029
13.1856	212.54
13.1812	198.044
13.2072	234.285
13.233	248.781
13.2327	221.6
13.2198	205.292
13.2197	194.42
13.2589	277.773
13.2588	263.277
13.2585	234.285
13.2843	248.781
13.2712	223.413
13.31	263.277
13.3098	236.097
13.3356	248.781
13.3659	292.269
13.3614	274.149
13.3613	259.653
13.3876	328.509
13.3874	314.013
13.4172	299.517
13.4128	281.397
13.3999	270.525
13.3997	256.029
13.3996	245.157
13.4644	321.261
13.4643	306.765
13.4642	294.081
13.5157	321.261
13.5156	306.765
13.5155	292.269
13.5153	277.773
13.5281	266.901
13.5712	314.013
13.5668	295.893
13.5667	285.021
13.593	361.125
13.5929	346.629
13.5928	332.133
13.6183	317.637
13.6485	357.501
13.6441	339.381
13.644	326.697
13.7004	422.733
13.696	404.613
13.6958	390.117
13.6957	375.621
13.6956	361.125
13.6955	350.253
13.7473	411.861
13.7472	397.365
13.7471	382.869
13.7469	368.373
13.7468	353.877
13.7467	339.381
13.7985	397.365
13.7984	382.869
13.7982	368.373
13.828	350.253
13.8108	335.757
13.8498	400.989
13.8497	386.493
13.8496	371.997
13.8623	357.501
13.9009	379.245
13.9008	366.561
13.9267	390.117
13.9306	350.253
13.9134	339.381
13.9393	371.997
13.9518	328.509
13.9777	357.501
13.9775	343.005
13.9645	317.637
14.0031	332.133
14.029	368.373
14.0289	353.877
14.0288	339.381
14.0803	368.373
14.0802	353.877
14.0801	339.381
14.0799	324.885
14.0671	317.637
14.1097	306.765
14.1355	328.509
14.1309	288.645
14.1567	306.765
14.1825	317.637
14.1865	292.269
14.1821	275.961
14.1692	266.901
14.238	314.013
14.2336	295.893
14.259	277.773
14.2892	306.765
14.2848	288.645
14.3363	310.389
14.3361	295.893
14.336	281.397
14.3359	270.525
14.3917	293.477
14.3745	277.773
14.4431	306.765
14.4387	288.645
14.4385	274.149
14.4384	259.653
14.4255	252.405
14.4647	328.509
14.4902	314.013
14.49	299.517
14.4899	285.021
14.477	270.525
14.4769	259.653
14.5417	339.381
14.5416	324.885
14.5414	310.389
14.5413	295.893
14.5412	283.209
14.5283	274.149
14.5801	335.757
14.5928	321.261
14.5927	306.765
14.5926	294.081
14.6181	281.397
14.6441	321.261
14.644	306.765
14.6439	294.081
14.6742	335.757
14.6957	353.877
14.6996	314.013
14.6952	295.893
14.6951	283.209
14.7254	335.757
14.747	353.877
14.7509	314.013
14.7337	299.517
14.7335	285.021
14.7767	335.757
14.8022	316.429
14.8282	350.253
14.8237	332.133
14.8364	314.013
14.8796	364.749
14.8752	348.441
14.8622	335.757
14.9309	371.997
14.9265	353.877
14.9264	339.381
14.9781	393.741
14.978	379.245
14.9779	364.749
14.9778	350.253
14.9776	335.757
15.0039	408.237
[truncated: 3,856 more rows]

## Sheet: SG-06-Heated
2Theta	Counts (I)
3.23672	2314.53
3.23664	2305.18
3.23656	2295.84
3.23648	2286.49
3.23639	2277.15
3.24913	2267.8
3.24905	2258.46
3.24897	2249.11
3.24889	2239.77
3.2488	2230.42
3.24872	2221.08
3.24864	2211.73
3.24856	2202.38
3.24847	2193.04
3.24839	2183.69
3.24831	2174.35
3.27387	2165
3.2876	2267.8
3.28752	2258.46
3.28744	2249.11
3.28735	2239.77
3.28727	2230.42
3.30001	2221.08
3.29993	2211.73
3.29985	2202.38
3.29976	2193.04
3.29968	2183.69
3.2996	2174.35
3.29945	2156.82
3.32516	2165
3.325	2146.31
3.32492	2136.97
3.32483	2127.62
3.32475	2118.27
3.32467	2108.93
3.32459	2099.58
3.3245	2090.24
3.32442	2080.89
3.33848	2221.08
3.3384	2211.73
3.33832	2202.38
3.33823	2193.04
3.35097	2183.69
3.35089	2174.35
3.35073	2155.66
3.38073	2165
3.38056	2146.31
3.37619	2134.63
3.3761	2125.28
3.37602	2115.94
3.37594	2106.59
3.37586	2097.25
3.37577	2087.9
3.37569	2078.56
3.36283	2073.88
3.40551	2066.87
3.40113	2055.19
3.40105	2045.85
3.40096	2036.5
3.40088	2027.16
3.4008	2017.81
3.40072	2008.46
3.43053	1996.78
3.45244	2057.53
3.45236	2048.18
3.45228	2038.84
3.45219	2029.49
3.45211	2020.15
3.45203	2010.8
3.45178	1982.76
3.4517	1973.42
3.45162	1964.07
3.45154	1955.9
3.47759	2001.46
3.47751	1992.11
3.49058	2020.15
3.4905	2010.8
3.49025	1982.76
3.49017	1973.42
3.49008	1964.07
3.49	1954.73
3.50274	1945.38
3.50266	1936.04
3.50258	1926.69
3.50249	1917.35
3.50241	1908
3.50233	1898.65
3.50225	1889.31
3.50216	1879.96
3.50208	1870.62
3.502	1861.27
3.52756	1851.93
3.52748	1842.58
3.5274	1833.24
3.52731	1823.89
3.52723	1814.54
3.52715	1805.2
3.52707	1795.85
3.54113	1936.04
3.54104	1926.69
3.54096	1917.35
3.55368	1905.66
3.5536	1896.32
3.55352	1886.97
3.55343	1877.63
3.55335	1868.28
3.55327	1858.94
3.5569	1786.51
3.55253	1774.83
3.55244	1765.48
3.55236	1756.14
3.55228	1746.79
3.55221	1738.61
3.57881	1847.25
3.57873	1837.91
3.57865	1828.56
3.57856	1819.22
3.57848	1809.87
3.5784	1800.53
3.5918	1865.95
3.59172	1856.6
3.60824	1791.18
3.59108	1784.17
3.61707	1823.89
3.61699	1814.54
3.62971	1802.86
3.63376	1777.16
3.62938	1765.48
3.6293	1756.14
3.62922	1746.79
3.62913	1737.44
3.61627	1732.77
3.65525	1791.18
3.65467	1725.76
3.64179	1718.75
3.66816	1800.53
3.66799	1781.84
3.68071	1770.15
3.68063	1760.81
3.68055	1751.46
3.68046	1742.12
3.68038	1732.77
3.7102	1721.09
3.70582	1709.41
3.70574	1700.06
3.70566	1690.72
3.70557	1681.37
3.70549	1672.03
3.70541	1662.68
3.70534	1654.5
3.73178	1744.45
3.73169	1735.11
3.74443	1725.76
3.74435	1716.42
3.74427	1707.07
3.74419	1697.73
3.7441	1688.38
3.74402	1679.03
3.75674	1667.35
3.75666	1658.01
3.75658	1648.66
3.75649	1639.32
3.75641	1629.97
3.75633	1620.63
3.75625	1611.28
3.75616	1601.93
3.75608	1592.59
3.75601	1584.41
3.74313	1578.57
3.80818	1683.71
3.80809	1674.36
3.80801	1665.02
3.80793	1655.67
3.80785	1646.33
3.80776	1636.98
3.80768	1627.63
3.8076	1618.29
3.80752	1608.94
3.80743	1599.6
3.80735	1590.25
3.80727	1580.91
3.80719	1571.56
3.8071	1562.22
3.80702	1552.87
3.80694	1543.52
3.80688	1536.52
3.84619	1632.31
3.85893	1622.96
3.85885	1613.62
3.85876	1604.27
3.85868	1594.93
3.8586	1585.58
3.85852	1576.23
3.85843	1566.89
3.85835	1557.54
3.85827	1548.2
3.88811	1538.85
3.87095	1531.84
3.91016	1615.95
3.91008	1606.61
3.90999	1597.26
3.90991	1587.92
3.90983	1578.57
3.90975	1569.22
3.90966	1559.88
3.90958	1550.53
3.91363	1524.83
3.90925	1513.15
3.9223	1538.85
3.93479	1501.47
3.93471	1492.12
3.93463	1482.78
3.93455	1473.43
3.93446	1464.09
3.94778	1520.16
3.96052	1510.82
3.99036	1501.47
3.98598	1489.79
3.9859	1480.44
3.98582	1471.1
3.98573	1461.75
3.98565	1452.41
3.98557	1443.06
3.98549	1433.71
3.9854	1424.37
3.98532	1415.02
3.98524	1405.68
3.98516	1396.33
3.98507	1386.99
3.98499	1377.64
3.98491	1368.3
3.98483	1358.95
3.98474	1349.61
4.02459	1506.14
4.02451	1496.8
4.03725	1487.45
4.03717	1478.11
4.03709	1468.76
4.037	1459.42
4.03692	1450.07
4.03684	1440.72
4.03676	1431.38
4.03667	1422.03
4.03659	1412.69
4.03651	1403.34
4.03643	1394
4.03634	1384.65
4.03627	1376.47
4.06611	1367.52
4.07518	1426.71
4.08792	1417.36
4.08784	1408.01
4.08776	1398.67
4.08767	1389.32
4.08759	1379.98
4.11316	1370.63
4.11308	1362.46
4.12639	1417.36
4.12631	1408.01
4.12623	1398.67
4.12614	1389.32
4.13888	1379.98
4.13864	1351.94
4.13855	1342.6
4.13847	1333.25
4.13839	1323.91
4.13831	1314.56
4.16445	1370.63
4.16436	1361.29
4.19042	1408.01
4.19034	1398.67
4.19026	1389.32
4.19017	1379.98
4.18993	1351.94
4.18984	1342.6
4.18976	1333.25
4.18968	1323.91
4.1896	1314.56
4.18951	1305.21
4.18943	1295.87
4.18935	1286.52
4.18927	1277.18
4.18918	1267.83
4.1891	1258.49
4.18902	1249.14
4.18895	1240.96
4.20291	1370.63
4.21563	1358.95
4.22835	1347.27
4.24109	1337.92
4.24101	1328.58
4.24093	1319.23
4.24085	1309.89
4.24076	1300.54
4.24068	1291.2
4.2406	1281.85
4.24052	1272.5
4.24043	1263.16
4.24035	1253.81
4.24027	1244.47
4.24019	1235.12
4.26578	1229.28
4.27952	1333.25
4.27944	1323.91
4.27935	1314.56
4.29207	1302.88
4.29199	1293.53
4.29191	1284.19
4.29183	1274.84
4.29174	1265.5
4.29166	1256.15
4.29158	1246.8
4.2915	1237.46
4.29563	1221.1
4.29125	1209.42
4.29117	1200.08
4.29108	1190.73
4.291	1181.39
4.27814	1176.71
4.34299	1260.82
4.34291	1251.48
4.34283	1242.13
4.34275	1232.79
4.34266	1223.44
4.34258	1214.1
4.34251	1205.92
4.32963	1200.08
4.38144	1258.49
4.39416	1246.8
4.39408	1237.46
4.394	1228.11
4.39391	1218.77
4.39383	1209.42
4.39375	1200.08
4.39367	1190.73
4.39358	1181.39
4.3935	1172.04
4.39342	1162.69
4.39335	1154.52
4.43219	1197.74
4.44491	1186.06
4.44483	1176.71
4.44475	1167.37
4.44467	1158.02
4.44458	1148.68
4.4445	1139.33
4.44442	1129.99
4.44434	1120.64
4.44425	1111.29
4.44418	1103.12
4.48328	1174.38
4.496	1162.69
4.49592	1153.35
4.48305	1148.68
4.52573	1141.67
4.52136	1129.99
4.52127	1120.64
4.54731	1165.03
4.54723	1155.69
4.54681	1108.96
4.54673	1099.61
4.54665	1090.27
4.55997	1146.34
4.57271	1136.99
4.57263	1127.65
4.57254	1118.3
4.57221	1080.92
4.57213	1071.58
4.57205	1062.23
4.57197	1052.88
4.57188	1043.54
4.5718	1034.19
4.60238	1108.96
4.598	1097.28
4.59792	1087.93
4.61113	1132.32
4.61105	1122.98
4.62346	1076.25
4.62338	1066.9
4.6233	1057.56
4.62321	1048.21
4.62313	1038.87
4.62305	1029.52
4.62299	1022.51
4.65363	1104.29
4.64925	1092.6
4.64917	1083.26
4.67899	1071.58
4.67461	1059.89
4.67453	1050.55
4.67444	1041.2
4.67436	1031.86
4.70071	1111.29
4.70062	1101.95
4.70054	1092.6
4.70046	1083.26
4.70418	1020.18
4.6998	1008.49
4.69972	999.148
4.69963	989.803
4.68677	985.13
4.71318	1071.58
4.7131	1062.23
4.72582	1050.55
4.72573	1041.2
4.72565	1031.86
4.75547	1020.18
4.75109	1008.49
4.75101	999.148
4.75093	989.803
4.73806	985.13
4.7643	1052.88
4.77704	1043.54
4.77696	1034.19
4.77647	978.121
4.77638	968.775
4.7763	959.43
4.8068	1024.85
4.80242	1013.17
4.80234	1003.82
4.80226	994.475
4.80217	985.13
4.80614	950.084
4.80176	938.402
4.80168	929.057
4.78882	924.384
4.82827	1036.53
4.83199	973.448
4.82761	961.766
4.84099	1024.85
4.84091	1015.5
4.85363	1003.82
4.85355	994.475
4.85346	985.13
4.85319	953.589
4.87901	973.448
4.87892	964.102
4.90488	999.148
4.9048	989.803
4.90471	980.457
4.90876	954.757
4.90438	943.075
4.9043	933.729
4.90422	924.384
4.90414	915.038
4.89127	910.366
4.93453	968.775
4.93396	904.135
4.95578	954.757
4.9557	945.411
4.95561	936.066
4.95553	926.72
4.95545	917.375
4.96877	973.448
4.96868	964.102
4.98104	911.534
5.00684	929.057
5.00676	919.711
5.01089	903.357
5.00651	891.675
5.00643	882.329
5.05803	917.375
5.05795	908.029
5.05786	898.684
5.05779	890.506
5.08762	879.993
5.08324	868.311
5.08316	858.965
5.1092	903.357
5.10911	894.011
5.1087	847.283
5.10862	837.938
5.10854	828.592
5.10846	820.415
5.1392	912.702
5.13895	884.665
5.13457	872.984
5.13449	863.638
5.13441	854.293
5.14762	898.684
5.16423	843.389
5.14704	833.265
5.14696	823.92
5.19016	875.32
5.18578	863.638
5.1857	854.293
5.21124	842.611
5.21116	833.265
5.2111	826.256
5.23728	887.002
5.23719	877.656
5.23711	868.311
5.23703	858.965
5.23695	849.62
5.26249	837.938
5.26241	828.592
5.26232	819.247
5.27564	875.32
5.27556	865.974
5.28828	854.293
5.2882	844.947
5.29216	809.901
5.28778	798.219
5.2877	788.874
5.28762	779.528
5.28754	770.183
5.27467	765.51
5.31801	833.265
5.31364	821.583
5.32669	847.283
5.33918	809.901
5.33911	801.724
5.35225	837.938
5.35217	828.592
5.35208	819.247
5.36893	791.21
5.39018	777.192
5.3901	767.846
5.39001	758.501
5.38993	749.155
5.38985	739.81
5.38978	731.633
5.4163	830.929
5.41622	821.583
5.41613	812.238
5.41605	802.892
5.41598	794.715
5.40308	786.537
5.46745	814.574
5.46736	805.229
5.46728	795.883
5.4672	786.537
5.46712	777.192
5.46703	767.846
5.46695	758.501
5.49334	842.611
5.49326	833.265
5.49317	823.92
5.49251	749.155
5.49243	739.81
5.50591	814.574
5.51863	802.892
5.51855	793.547
5.51847	784.201
5.51839	774.856
5.5183	765.51
5.51822	756.165
5.5438	749.155
5.57422	805.229
5.56984	793.547
5.56976	784.201
5.56968	774.856
5.56959	765.51
5.56951	756.165
5.59505	744.483
5.60845	809.901
5.60837	800.556
5.60829	791.21
5.60821	781.865
5.62095	772.519
5.62086	763.174
5.62078	753.828
5.64634	744.483
5.64626	735.137
5.64618	725.792
5.6461	716.446
5.64601	707.101
5.64593	697.755
5.64585	688.409
5.67635	753.828
5.68477	739.81
5.68469	730.464
5.69741	718.782
5.69732	709.437
5.69724	700.091
5.69716	690.746
5.69708	681.4
5.69699	672.055
5.69692	663.877
5.68405	658.037
5.74905	758.501
5.74897	749.155
5.74888	739.81
5.7488	730.464
5.74872	721.119
5.74864	711.773
5.74855	702.428
5.74847	693.082
5.74839	683.737
5.74832	675.559
5.73542	667.382
5.80034	758.501
5.80026	749.155
5.80017	739.81
5.80009	730.464
5.80001	721.119
5.79993	711.773
5.79984	702.428
5.79976	693.082
5.79968	683.737
5.79961	675.559
5.85545	707.101
5.85107	695.419
5.85099	686.073
5.85092	677.896
5.87694	721.119
5.90249	709.437
5.9024	700.091
5.90232	690.746
5.90224	681.4
5.90216	672.055
5.90207	662.709
5.90199	653.364
5.90191	644.018
5.88904	639.346
5.94097	711.773
5.95371	702.428
5.95363	693.082
5.95355	683.737
5.95348	675.559
5.94056	665.046
6.0092	693.082
6.00482	681.4
6.00474	672.055
6.00465	662.709
6.00457	653.364
6.00449	644.018
6.00441	634.673
6.00432	625.327
6.00424	615.982
6.05632	704.764
6.05623	695.419
6.05615	686.073
6.05607	676.728
6.05599	667.382
6.0559	658.037
6.05582	648.691
6.05574	639.346
6.04288	634.673
6.10728	667.382
6.10719	658.037
6.10711	648.691
6.10703	639.346
6.10695	630
6.10688	622.991
6.16319	707.101
6.15881	695.419
6.15873	686.073
6.15865	676.728
6.15857	667.382
6.15848	658.037
6.1584	648.691
6.15832	639.346
6.18814	627.664
6.18377	617.15
6.21019	704.764
6.2101	695.419
6.21002	686.073
6.20994	676.728
6.20986	667.382
6.20978	658.037
6.20969	648.691
6.20961	639.346
6.26133	688.409
6.26125	679.064
6.26117	669.718
6.26109	660.373
6.261	651.027
6.26092	641.682
6.26084	632.336
6.26076	622.991
6.29972	679.064
6.29964	669.718
6.31236	658.037
6.31227	648.691
6.31219	639.346
6.31211	630
6.31203	620.654
6.31194	611.309
6.31187	603.132
6.36363	655.7
6.36354	646.355
6.36346	637.009
6.36338	627.664
6.3633	618.318
6.36321	608.973
6.36313	599.627
6.39363	665.046
6.41915	651.027
6.41477	639.346
6.41469	630
6.40183	625.327
6.445	674.391
6.44062	662.709
6.46614	648.691
6.46606	639.346
6.46598	630
6.4659	620.654
6.46581	611.309
6.46573	601.963
6.46565	592.618
6.45279	587.945
6.49119	580.936
6.47831	573.927
6.52185	665.046
6.51748	653.364
6.51739	644.018
6.51731	634.673
6.51724	626.495
6.50434	618.318
6.50426	608.973
6.50418	599.627
6.5041	590.282
6.54343	688.409
6.54335	679.064
6.55609	669.718
6.56881	658.037
6.56873	648.691
6.56864	639.346
6.56856	630
6.56848	620.654
6.5684	611.309
6.55553	606.636
6.62006	653.364
6.61997	644.018
6.61989	634.673
6.61981	625.327
6.61973	615.982
6.60686	611.309
6.67127	644.018
6.67118	634.673
6.6711	625.327
6.67102	615.982
6.67094	606.636
6.67085	597.291
6.67077	587.945
6.70059	576.263
6.69621	564.581
6.68335	559.909
6.70967	637.009
6.72239	625.327
6.72231	615.982
6.72223	606.636
6.72214	597.291
6.72206	587.945
6.72603	552.899
6.70887	545.89
6.7476	576.263
6.74752	566.918
6.77391	651.027
6.77383	641.682
6.77374	632.336
6.77366	622.991
6.77358	613.645
6.7735	604.3
6.77341	594.954
6.77333	585.609
6.76028	559.909
6.78607	576.263
6.78599	566.918
6.82955	660.373
6.82518	648.691
6.8251	639.346
6.82501	630
6.82493	620.654
6.81205	613.645
6.81196	604.3
6.8119	597.291
6.87655	658.037
6.87647	648.691
6.87639	639.346
6.8763	630
6.87622	620.654
6.87614	611.309
6.87606	601.963
6.87597	592.618
6.90153	582.104
6.915	655.7
6.92772	644.018
6.92763	634.673
6.92755	625.327
6.92747	615.982
6.92739	606.636
6.92731	597.291
6.92722	587.945
6.95276	576.263
6.95268	566.918
6.95262	559.909
6.9789	632.336
6.97882	622.991
6.97874	613.645
6.97866	604.3
6.97857	594.954
6.97849	585.609
7.00496	679.064
7.00488	669.718
7.0048	660.373
7.00471	651.027
7.00463	641.682
6.99125	578.6
7.0302	632.336
7.03011	622.991
7.03003	613.645
7.02996	605.468
7.01706	597.291
7.06044	669.718
7.05607	658.037
7.05598	648.691
7.0559	639.346
7.09468	674.391
7.0946	665.046
7.10732	653.364
7.10723	644.018
7.10715	634.673
7.10707	625.327
7.13689	613.645
7.13251	601.963
7.15896	693.082
7.15887	683.737
7.15879	674.391
7.15871	665.046
7.15863	655.7
7.15854	646.355
7.15846	637.009
7.15838	627.664
7.18822	618.318
7.18384	606.636
7.18376	597.291
7.18367	587.945
7.18359	578.6
7.17073	573.927
7.1973	679.064
7.21002	667.382
7.20994	658.037
7.20986	648.691
7.20977	639.346
7.20969	630
7.23523	618.318
7.23515	608.973
7.23507	599.627
7.235	591.45
7.22208	580.936
7.22202	573.927
7.26565	674.391
7.26127	662.709
7.26119	653.364
7.26111	644.018
7.26102	634.673
7.26094	625.327
7.28648	613.645
7.2864	604.3
7.31706	688.409
7.31268	676.728
7.3126	667.382
7.31252	658.037
7.31245	649.859
7.29955	641.682
7.29947	632.336
7.29939	622.991
7.29916	597.291
7.36848	702.428
7.3641	690.746
7.36402	681.4
7.36393	672.055
7.36385	662.709
7.36377	653.364
7.36369	644.018
7.3636	634.673
7.36353	626.495
7.41537	688.409
7.41529	679.064
7.4152	669.718
7.41512	660.373
7.41505	652.196
7.4711	707.101
7.46672	695.419
7.46664	686.073
7.46656	676.728
7.46647	667.382
7.46639	658.037
7.46631	648.691
7.46623	639.346
7.46615	631.168
7.49259	721.119
7.52243	711.773
7.51805	700.091
7.51797	690.746
7.54354	682.569
7.56959	728.128
7.56951	718.782
7.56942	709.437
7.56934	700.091
7.56926	690.746
7.5948	679.064
7.59472	669.718
7.59464	660.373
7.59458	653.364
7.6253	744.483
7.62092	732.801
7.62084	723.455
7.62076	714.11
7.62067	704.764
7.6206	696.587
7.60771	688.409
7.64696	777.192
7.64688	767.846
7.64679	758.501
7.67663	749.155
7.67225	737.473
7.67218	729.296
7.65929	721.119
7.65922	714.11
7.72398	786.537
7.72389	777.192
7.72381	767.846
7.72373	758.501
7.72365	749.155
7.72356	739.81
7.72348	730.464
7.72342	723.455
7.74977	802.892
7.74968	793.547
7.77523	781.865
7.77514	772.519
7.77506	763.174
7.77498	753.828
7.76207	744.483
7.76199	735.137
7.82672	805.229
7.82664	795.883
7.82656	786.537
7.82649	778.36
7.81357	767.846
7.81349	758.501
7.85245	814.574
7.87834	842.611
7.87826	833.265
7.87818	823.92
7.87801	805.229
7.87794	797.051
7.90834	851.956
7.90801	814.574
7.93387	837.938
7.92949	826.256
7.93354	800.556
7.91636	791.21
7.95553	870.647
7.95544	861.302
7.95536	851.956
7.94221	814.574
7.98142	898.684
7.98134	889.338
7.98125	879.993
7.98093	843.779
7.96802	833.265
8.00682	870.647
8.00673	861.302
8.00665	851.956
8.03707	908.029
8.03269	896.347
8.03262	888.17
8.01972	879.993
8.01941	844.947
8.05854	919.711
8.08408	908.029
8.08401	899.852
8.07109	889.338
8.11047	992.139
8.11039	982.793
8.1103	973.448
8.11022	964.102
8.11014	954.757
8.11006	945.411
8.10997	936.066
8.10989	926.72
8.10981	917.375
8.13537	908.029
8.13531	901.02
8.16159	973.448
8.16151	964.102
8.16143	954.757
8.16135	945.411
8.16126	936.066
8.16118	926.72
8.1611	917.375
8.1916	982.793
8.17384	908.029
8.21309	996.812
8.21285	969.943
8.19994	959.43
8.19988	952.421
8.23907	1034.19
8.23898	1024.85
8.2389	1015.5
8.23882	1006.16
8.23866	988.634
8.22575	978.121
8.26956	1099.61
8.26519	1087.93
8.2651	1078.59
8.26502	1069.24
8.26494	1059.89
8.26486	1050.55
8.26478	1042.37
8.25156	996.812
8.29533	1113.63
8.31683	1127.65
8.31658	1099.61
8.30367	1090.27
8.30359	1080.92
8.30351	1071.58
8.30343	1062.23
8.30336	1055.22
8.34264	1146.34
8.34255	1136.99
8.34239	1118.3
8.34231	1108.96
8.3728	1174.38
8.36843	1162.69
8.36834	1153.35
8.37239	1127.65
8.35505	1099.61
8.39463	1225.78
8.39455	1216.43
8.39446	1207.09
8.39438	1197.74
8.3943	1188.39
8.38106	1141.67
8.42463	1235.12
8.41989	1182.55
8.45081	1295.87
8.44643	1284.19
8.44635	1274.84
8.44627	1265.5
8.44619	1256.15
8.4461	1246.8
8.45015	1221.1
8.44577	1209.42
8.44569	1200.08
8.44561	1190.73
8.44974	1174.38
8.43256	1165.03
8.47272	1356.61
8.47264	1347.27
8.47255	1337.92
8.47247	1328.58
8.47239	1319.23
8.47231	1309.89
8.45882	1235.12
8.50214	1300.54
8.48496	1291.2
8.48488	1281.85
8.4848	1272.5
8.48472	1263.16
8.52454	1417.36
8.52446	1408.01
8.52438	1398.67
8.5243	1389.32
8.52421	1379.98
8.52413	1370.63
8.52405	1361.29
8.52397	1351.94
8.52389	1343.76
8.51098	1333.25
8.5109	1323.91
8.51081	1314.56
8.55044	1445.4
8.55035	1436.05
8.55027	1426.71
8.57707	1557.54
8.57699	1548.2
8.57691	1538.85
8.57682	1529.51
8.57674	1520.16
8.57666	1510.82
8.57658	1501.47
8.57649	1492.12
8.57641	1482.78
8.57633	1473.43
8.57625	1464.09
8.57616	1454.74
8.57584	1418.53
8.56293	1408.01
8.56285	1398.67
8.56276	1389.32
8.60782	1651
8.60344	1639.32
8.60336	1629.97
8.60327	1620.63
8.60319	1611.28
8.60311	1601.93
8.60303	1592.59
8.60294	1583.24
8.60286	1573.9
8.60279	1565.72
8.5889	1445.4
8.58882	1436.05
8.58874	1426.71
8.63358	1665.02
8.6601	1763.14
8.65572	1751.46
8.65564	1742.12
8.65555	1732.77
8.65547	1723.43
8.65539	1714.08
8.65531	1704.74
8.65522	1695.39
8.65514	1686.04
8.65506	1676.7
8.65485	1653.33
8.64193	1641.65
8.64186	1634.64
8.68669	1870.62
8.68231	1858.94
8.68223	1849.59
8.68215	1840.25
8.68206	1830.9
8.68198	1821.55
8.6819	1812.21
8.68182	1802.86
8.68173	1793.52
8.68165	1784.17
8.68157	1774.83
8.66778	1665.02
8.70942	2024.82
8.70934	2015.47
8.70926	2006.13
8.70917	1996.78
8.70909	1987.44
8.70901	1978.09
8.70893	1968.75
8.70884	1959.4
8.70876	1950.06
8.70868	1940.71
8.7086	1931.36
8.70851	1922.02
8.70843	1912.67
8.70835	1903.33
8.70827	1893.98
8.70818	1884.64
8.69431	1765.48
8.74124	2239.77
8.73686	2228.08
8.73678	2218.74
8.73669	2209.39
8.73661	2200.05
8.73653	2190.7
8.73645	2181.36
8.73636	2172.01
8.73628	2162.67
8.7362	2153.32
8.73612	2143.97
8.73603	2134.63
8.73595	2125.28
8.73587	2115.94
8.73579	2106.59
8.7357	2097.25
8.73562	2087.9
8.73554	2078.56
8.73546	2069.21
8.73537	2059.86
8.73529	2050.52
8.73521	2041.17
8.73514	2033
8.72092	1875.29
8.72084	1865.95
8.72076	1856.6
8.72068	1847.25
8.72059	1837.91
8.72051	1828.56
8.72045	1821.55
8.76799	2365.93
8.76362	2354.25
8.76354	2344.9
8.76345	2335.56
8.76337	2326.21
8.76329	2316.87
8.76321	2307.52
8.76312	2298.18
8.76304	2288.83
8.76296	2279.48
8.76288	2270.14
8.76279	2260.79
8.76271	2251.45
8.79475	2492.1
8.79038	2480.41
8.79029	2471.07
8.79021	2461.72
8.79013	2452.38
8.79005	2443.03
8.78996	2433.69
8.78988	2424.34
8.7898	2414.99
8.78972	2405.65
8.78963	2396.3
8.78955	2386.96
8.78947	2377.61
8.81765	2664.99
8.81757	2655.64
8.81749	2646.3
8.8174	2636.95
8.81732	2627.61
8.81724	2618.26
8.81716	2608.91
8.81707	2599.57
8.81699	2590.22
8.81691	2580.88
8.81683	2571.53
8.81674	2562.19
8.81666	2552.84
8.81658	2543.5
8.8165	2534.15
8.81641	2524.8
8.81633	2515.46
8.81625	2506.11
8.80219	2365.93
8.80213	2358.92
8.82901	2499.1
8.86915	2688.35
8.86906	2679.01
8.86898	2669.66
8.8689	2660.31
8.86882	2650.97
8.86873	2641.62
8.86865	2632.28
8.86857	2622.93
8.86849	2613.59
8.8684	2604.24
8.86832	2594.9
8.86824	2585.55
8.86816	2576.21
8.86807	2566.86
8.89791	2557.51
8.89353	2545.83
8.89345	2536.49
8.89337	2527.14
8.89329	2517.8
8.8932	2508.45
8.89312	2499.1
8.89304	2489.76
8.89296	2480.41
8.89287	2471.07
8.89279	2461.72
8.87993	2457.05
8.90667	2580.88
8.90658	2571.53
8.91833	2450.04
8.91825	2440.69
8.91817	2431.35
8.91809	2422
8.918	2412.66
8.91792	2403.31
8.91784	2393.97
8.91776	2384.62
8.91767	2375.28
8.91759	2365.93
8.91751	2356.59
8.91743	2347.24
8.91734	2337.89
8.91726	2328.55
8.91718	2319.2
8.9171	2309.86
8.91701	2300.51
8.91693	2291.17
8.91685	2281.82
8.91677	2272.48
8.91668	2263.13
8.9166	2253.78
8.91652	2244.44
8.91644	2235.09
8.91636	2225.75
8.91627	2216.4
8.91619	2207.06
8.91611	2197.71
8.91603	2188.37
8.91594	2179.02
8.91586	2169.67
8.91578	2160.33
8.9157	2150.98
8.91561	2141.64
8.91553	2132.29
8.91545	2122.95
8.91537	2113.6
8.91528	2104.26
8.91521	2096.08
8.94504	2085.57
8.94066	2073.88
8.94058	2064.54
8.9405	2055.19
8.92763	2050.52
8.95412	2146.31
8.95404	2136.97
8.95396	2127.62
8.95387	2118.27
8.95379	2108.93
8.95371	2099.58
8.97031	2043.51
8.96593	2031.83
8.96585	2022.48
8.96577	2013.14
8.96569	2003.79
8.9656	1994.45
8.96552	1985.1
8.96544	1975.76
8.96536	1966.41
8.96527	1957.06
8.96519	1947.72
8.95233	1943.05
8.99501	1936.04
8.99063	1924.35
8.99055	1915.01
8.99047	1905.66
8.99038	1896.32
8.9903	1886.97
8.99022	1877.63
8.99014	1868.28
8.99005	1858.94
8.98997	1849.59
8.98989	1840.25
8.98981	1830.9
8.98972	1821.55
8.98964	1812.21
8.98956	1802.86
8.98948	1793.52
8.98942	1786.51
9.02858	1865.95
9.0285	1856.6
9.02842	1847.25
9.02834	1837.91
9.02825	1828.56
9.04099	1819.22
9.04091	1809.87
9.04083	1800.53
9.04075	1791.18
9.04066	1781.84
9.04058	1772.49
9.0405	1763.14
9.04042	1753.8
9.04033	1744.45
9.04025	1735.11
9.04017	1725.76
9.04009	1716.42
9.06992	1707.07
9.06555	1695.39
9.05268	1690.72
9.07909	1777.16
9.07901	1767.82
9.07893	1758.47
9.07884	1749.13
9.09156	1737.44
9.09148	1728.1
9.0914	1718.75
9.09536	1683.71
9.09099	1672.03
9.0909	1662.68
9.09082	1653.33
9.10412	1707.07
9.10404	1697.73
9.12064	1641.65
9.11626	1629.97
9.11618	1620.63
9.1161	1611.28
9.12956	1683.71
9.12947	1674.36
9.12939	1665.02
9.12931	1655.67
9.14591	1599.6
9.14153	1587.92
9.14145	1578.57
9.14137	1569.22
9.14129	1559.88
9.1412	1550.53
9.14112	1541.19
9.14104	1531.84
9.16658	1520.16
9.1665	1510.82
9.16642	1501.47
9.16633	1492.12
9.16625	1482.78
9.16617	1473.43
9.16609	1464.09
9.166	1454.74
9.16592	1445.4
9.16585	1437.22
9.1799	1576.23
9.17982	1566.89
9.17973	1557.54
9.17965	1548.2
9.17957	1538.85
9.17949	1529.51
9.19143	1430.21
9.2046	1468.76
9.20451	1459.42
9.20443	1450.07
9.20435	1440.72
9.21701	1422.03
9.21692	1412.69
9.21684	1403.34
9.21676	1394
9.21668	1384.65
9.21659	1375.31
9.24216	1365.96
9.24207	1356.61
9.24199	1347.27
9.24191	1337.92
9.24183	1328.58
9.24174	1319.23
9.24167	1311.05
9.26722	1300.54
9.26714	1291.2
9.26706	1281.85
9.26698	1272.5
9.26689	1263.16
9.26681	1253.81
9.26674	1245.64
9.28013	1309.89
9.29657	1235.12
9.29219	1223.44
9.29211	1214.1
9.29202	1204.75
9.29194	1195.4
9.29186	1186.06
9.29178	1176.71
9.27891	1172.04
9.30524	1249.14
9.31732	1165.03
9.31724	1155.69
9.31715	1146.34
9.31707	1136.99
9.33031	1183.72
9.33022	1174.38
9.34263	1127.65
9.34255	1118.3
9.34247	1108.96
9.34239	1099.61
9.3423	1090.27
9.34222	1080.92
9.34214	1071.58
9.34206	1062.23
9.34197	1052.88
9.34189	1043.54
9.34182	1035.36
9.37165	1024.85
9.36727	1013.17
9.36719	1003.82
9.3671	994.475
9.36702	985.13
9.35416	980.457
9.39322	1048.21
9.39314	1038.87
9.39256	973.448
9.39248	964.102
9.39241	955.925
9.40588	1029.52
9.4058	1020.18
9.40572	1010.83
9.40563	1001.48
9.41837	992.139
9.41829	982.793
9.41796	945.411
9.41788	936.066
9.4178	926.72
9.41773	918.543
9.43103	973.448
9.43095	964.102
9.43087	954.757
9.44328	908.029
9.4432	898.684
9.44311	889.338
9.44303	879.993
9.44295	870.647
9.44287	861.302
9.44278	851.956
9.4427	842.611
9.44262	833.265
9.44254	823.92
9.45643	945.411
9.45635	936.066
9.45627	926.72
9.45618	917.375
9.4681	814.574
9.46802	805.229
9.46794	797.051
9.49399	842.611
9.49391	833.265
9.49383	823.92
9.4935	786.537
9.49341	777.192
9.49334	769.015
9.50657	814.574
9.50648	805.229
9.5064	795.883
9.51889	758.501
9.51881	749.155
9.51873	739.81
9.51865	730.464
9.51856	721.119
9.51848	711.773
9.5184	702.428
9.53188	777.192
9.5318	767.846
9.54824	693.082
9.53108	686.073
9.55716	735.137
9.55707	725.792
9.55699	716.446
9.56973	707.101
9.56948	679.064
9.5694	669.718
9.56932	660.373
9.56925	652.196
9.58247	697.755
9.58239	688.409
9.62061	660.373
9.62053	651.027
9.62044	641.682
9.62036	632.336
9.62028	622.991
9.6202	613.645
9.62011	604.3
9.62003	594.954
9.61996	586.777
9.64551	576.263
9.64543	566.918
9.64536	558.74
9.6585	594.954
9.65842	585.609
9.67518	548.227
9.67081	536.545
9.67072	527.199
9.65786	522.526
9.69668	562.245
9.70942	552.899
9.72216	543.554
9.72208	534.208
9.72199	524.863
9.72191	515.517
9.72183	506.172
9.72176	497.994
9.76067	548.227
9.76059	538.881
9.7605	529.536
9.77324	520.19
9.77316	510.845
9.77308	501.499
9.773	492.154
9.77291	482.808
9.77283	473.462
9.77275	464.117
9.77269	457.108
9.82435	499.163
9.82427	489.817
9.82418	480.472
9.8241	471.126
9.82402	461.781
9.82394	452.435
9.82385	443.09
9.82377	433.744
9.8237	425.567
9.87537	468.79
9.87529	459.444
9.87521	450.099
9.87512	440.753
9.87504	431.408
9.87496	422.062
9.90054	415.053
9.92635	433.744
9.92627	424.398
9.95609	412.717
9.95171	401.035
9.95163	391.689
9.95154	382.344
9.95146	372.998
9.96476	426.735
10.0072	394.026
10.0028	382.344
10.0028	372.998
10.0027	363.653
9.98981	358.98
10.0282	353.139
10.0542	396.362
10.0542	387.016
10.0541	377.671
10.054	368.325
10.0539	358.98
10.1054	377.671
10.1053	368.325
10.1052	358.98
10.1051	349.634
10.1307	337.952
10.1306	328.607
10.1566	372.998
10.1565	363.653
10.1565	354.307
10.1564	344.962
10.1604	319.261
10.1433	312.252
10.1819	333.28
10.195	361.316
10.1949	351.971
10.2076	342.625
10.2075	323.934
10.2074	314.589
10.2073	307.579
10.2332	333.28
10.259	351.971
10.2589	342.625
10.2588	323.934
10.2587	314.589
10.2845	333.28
10.3143	323.934
10.31	312.252
10.3099	302.907
10.3098	293.561
10.3097	284.216
10.3614	328.607
10.3613	319.261
10.3612	309.916
10.3611	300.57
10.3611	292.393
10.4126	323.934
10.4126	314.589
10.4125	305.243
10.4124	295.898
10.4123	286.552
10.4122	277.207
10.4121	267.861
10.4121	258.515
10.412	249.17
10.4119	242.161
10.451	314.589
10.4637	302.907
10.4637	293.561
10.4636	284.216
10.4507	277.207
10.5193	305.243
10.515	293.561
10.5149	284.216
10.502	279.543
10.5447	272.534
10.5403	260.852
10.5274	256.179
10.5535	305.243
10.5663	295.898
10.5662	286.552
10.5918	280.711
10.6175	291.225
10.6476	309.916
10.6432	298.234
10.6474	281.879
10.643	270.197
10.6301	265.525
10.6728	258.515
10.6684	248.002
10.6986	281.879
10.6943	270.197
10.7241	258.515
10.7457	291.225
10.7457	281.879
10.7456	272.534
10.7754	263.188
10.7583	256.179
10.7972	305.243
10.7971	295.898
10.797	286.552
10.7969	277.207
10.7967	249.17
10.8225	267.861
10.8224	258.515
10.8094	242.161
10.8484	295.898
10.8483	286.552
10.8482	277.207
10.8738	269.029
10.8609	260.852
10.8997	295.898
10.8996	286.552
10.8995	277.207
10.9251	267.861
10.925	258.515
10.9249	250.338
10.9551	286.552
10.9508	274.87
10.9806	263.188
10.9634	253.843
10.9894	295.898
10.9893	286.552
11.002	274.87
11.0319	263.188
11.0275	251.506
11.0274	244.497
11.0576	277.207
11.0789	263.188
11.0788	253.843
11.0787	245.665
11.1047	279.543
11.1046	270.197
11.1301	258.515
11.13	249.17
11.13	239.824
11.1561	293.561
11.156	284.216
11.1559	274.87
11.1558	265.525
11.1814	253.843
11.1813	244.497
11.1812	235.152
11.1944	272.534
11.2071	263.188
11.2068	228.143
11.237	254.621
11.2198	244.497
11.2197	235.152
11.2585	274.87
11.2584	265.525
11.284	253.843
11.2839	244.497
11.2838	235.152
11.314	272.534
11.3097	260.852
11.3094	229.311
11.3395	249.17
11.3351	237.488
11.361	263.188
11.3867	272.534
11.3865	253.843
11.3865	244.497
11.3864	236.32
11.4123	263.188
11.438	270.197
11.4421	253.843
11.4377	242.161
11.4376	232.815
11.4376	224.638
11.4247	218.797
11.4892	258.515
11.4891	249.17
11.489	239.824
11.4889	230.479
11.4888	221.133
11.5447	253.843
11.5403	242.161
11.5402	232.815
11.5274	228.143
11.596	258.515
11.5916	246.834
11.5788	242.161
11.6215	235.152
11.6171	223.47
11.6042	218.797
11.643	256.179
11.6429	246.834
11.6727	235.152
11.6684	223.47
11.6985	249.17
11.6982	211.788
11.6938	200.106
11.6809	195.433
11.7198	235.152
11.7197	225.806
11.7456	251.506
11.7455	242.161
11.7495	218.018
11.7753	230.479
11.7968	242.161
11.7966	218.797
11.7837	209.451
11.8223	230.479
11.8481	249.17
11.848	239.824
11.8479	221.133
11.8738	256.179
11.8779	230.479
11.8994	244.497
11.8991	216.461
11.9249	232.815
11.9248	223.47
11.9762	235.152
11.9761	225.806
11.9761	218.797
12.0318	235.152
12.0274	223.47
12.0273	214.124
12.0272	204.779
12.0272	195.433
12.0143	190.76
12.0789	246.834
12.0788	237.488
12.0787	228.143
12.0787	218.797
12.1042	210.62
12.1302	249.17
12.1301	239.824
12.13	230.479
12.13	221.133
12.1598	211.788
12.1554	200.106
12.1816	260.852
12.1815	251.506
12.1814	242.161
12.1814	232.815
12.1813	223.47
12.2068	211.788
12.2067	203.611
12.237	239.824
12.2326	229.311
12.2197	221.133
12.2883	244.497
12.2839	232.815
12.2839	223.47
12.2838	214.124
12.2837	205.947
12.3353	242.161
12.3352	232.815
12.3351	223.47
12.3351	214.124
12.335	205.947
12.3866	244.497
12.3865	235.152
12.3865	225.806
12.3736	218.797
12.4421	235.152
12.4377	223.47
12.4376	214.124
12.4248	209.451
12.4891	235.152
12.489	225.806
12.489	216.461
12.4889	207.115
12.4888	200.106
12.5404	237.488
12.5403	228.143
12.5403	218.797
12.5402	210.62
12.5273	204.779
12.5917	232.815
12.5916	223.47
12.5915	214.124
12.5914	204.779
12.5914	196.601
12.6472	230.479
12.6428	218.797
12.6428	209.451
12.6427	200.106
12.6426	193.097
12.6986	235.152
12.6942	223.47
12.6941	214.124
12.6812	207.115
12.6811	197.77
12.7201	258.515
12.7201	249.17
12.7458	265.525
12.7499	239.824
12.7455	228.143
12.7454	218.797
12.7325	211.788
12.7714	253.843
12.8012	244.497
12.7968	232.815
12.7968	223.47
12.7967	215.292
12.7838	209.451
12.8525	239.824
12.8481	228.143
12.848	218.797
12.8479	210.62
12.874	253.843
12.8867	244.497
12.8994	235.152
12.8994	225.806
12.8993	216.461
12.8992	208.283
12.9248	197.77
12.9247	190.76
12.951	270.197
12.951	260.852
12.9509	251.506
12.9508	242.161
12.9507	232.815
12.9506	223.47
12.9506	215.292
12.9377	207.115
12.9893	249.17
13.002	237.488
13.002	228.143
13.0019	218.797
13.0018	209.451
12.9889	202.442
13.0535	253.843
13.0534	244.497
13.0533	235.152
13.0532	225.806
13.0532	217.629
13.0919	253.843
13.1047	242.161
13.1046	232.815
13.1045	223.47
13.1044	215.292
13.156	244.497
13.1559	235.152
13.1558	225.806
13.1857	217.239
13.2114	230.479
13.2374	263.188
13.233	251.506
13.2329	242.161
13.2198	216.461
13.2588	277.207
13.2584	230.479
13.2887	267.861
13.2843	256.179
13.2842	246.834
13.2841	237.488
13.2883	222.691
13.3357	265.525
13.3356	256.179
13.3355	246.834
13.3354	237.488
13.3225	230.479
13.387	272.534
13.387	263.188
13.3869	253.843
13.3868	244.497
13.3867	235.152
13.3866	228.143
13.4382	253.843
13.4381	244.497
13.438	235.152
13.4379	225.806
13.4378	216.461
13.4639	263.188
13.4894	253.843
13.4894	244.497
13.4893	235.152
13.4892	225.806
13.4891	217.629
13.4762	209.451
13.5152	263.188
13.5409	272.534
13.5407	255.011
13.5279	246.834
13.5666	281.879
13.5536	263.188
13.5924	300.57
13.5924	291.225
13.5922	272.534
13.6179	279.543
13.622	263.188
13.6177	252.675
13.669	260.852
13.6689	251.506
13.6689	242.161
13.656	237.488
13.7246	263.188
13.7202	251.506
13.7202	242.161
13.7457	230.479
13.7718	286.552
13.7718	277.207
13.7717	267.861
13.7716	258.515
13.7715	249.17
13.7714	240.993
13.823	272.534
13.8229	263.188
13.8228	253.843
13.8228	244.497
13.8227	235.152
13.8488	291.225
13.8487	281.879
13.8786	273.313
13.8614	265.525
13.9001	286.552
13.9299	277.207
13.9255	265.525
13.9254	256.179
13.9126	251.506
13.9514	291.225
13.9773	319.261
13.9772	309.916
13.9771	300.57
13.977	281.879
13.9769	272.534
13.9768	263.188
14.007	291.225
14.0066	254.621
13.9895	246.834
14.0282	277.207
14.0281	269.029
14.0585	314.589
14.0541	302.907
14.054	294.729
14.0411	286.552
14.1055	316.925
14.1054	307.579
14.1053	298.234
14.1052	288.888
14.1052	279.543
[truncated: 5,407 more rows]

## Sheet: SG-10-Untreated
2Theta	Counts (I)
3.31991	1556.56
3.31966	1528.34
3.31944	1503.65
3.34605	1613
3.3458	1584.78
3.37622	1641.22
3.37126	1563.62
3.35813	1528.34
3.39722	1598.89
3.41029	1627.11
3.42261	1570.67
3.42237	1542.45
3.45278	1598.89
3.47387	1567.14
3.50407	1598.89
3.52937	1558.91
3.55128	1620.05
3.55103	1591.83
3.60269	1634.16
3.60244	1605.94
3.60219	1577.73
3.58925	1563.62
3.65429	1669.43
3.65404	1641.22
3.65379	1613
3.65358	1588.31
3.68012	1690.6
3.70973	1655.33
3.70515	1620.05
3.7348	1589.48
3.7565	1627.11
3.78617	1598.89
3.78158	1563.62
3.76858	1542.45
3.80841	1697.65
3.80816	1669.43
3.80791	1641.22
3.83761	1615.35
3.85958	1683.54
3.85933	1655.33
3.88572	1739.98
3.88547	1711.76
3.88473	1627.11
3.91155	1761.14
3.91514	1683.54
3.91056	1648.27
3.9144	1598.89
3.90984	1567.14
3.93689	1725.87
3.96278	1754.09
3.96228	1697.65
3.96204	1669.43
3.94896	1641.22
3.94871	1613
3.94847	1584.78
3.94828	1563.62
3.98886	1803.47
3.98861	1775.25
3.99245	1725.87
4.01348	1687.07
4.00044	1662.38
4.03978	1761.14
4.03953	1732.92
4.03928	1704.71
4.09113	1768.2
4.09088	1739.98
4.09067	1715.29
4.07763	1690.6
4.1213	1796.42
4.14305	1838.74
4.1423	1754.09
4.14205	1725.87
4.12904	1704.71
4.16894	1866.96
4.16844	1810.52
4.16819	1782.31
4.19434	1838.74
4.19365	1761.14
4.22401	1810.52
4.20666	1782.31
4.2465	1937.51
4.24625	1909.29
4.246	1881.07
4.24575	1852.85
4.29754	1909.29
4.29729	1881.07
4.29704	1852.85
4.28403	1831.69
4.32343	1937.51
4.34883	1909.29
4.34858	1881.07
4.34833	1852.85
4.37497	1965.72
4.37472	1937.51
4.37376	1828.16
4.40439	1909.29
4.39981	1874.01
4.39956	1845.8
4.39922	1807
4.42633	1972.78
4.42608	1944.56
4.45141	1909.29
4.48257	2050.38
4.47799	2015.11
4.47774	1986.89
4.47749	1958.67
4.47724	1930.45
4.48108	1881.07
4.53399	2064.49
4.5294	2029.21
4.52916	2001
4.52894	1976.31
4.5159	1951.61
4.51565	1923.4
4.5154	1895.18
4.51521	1874.01
4.58113	2078.6
4.58088	2050.38
4.58063	2022.16
4.56762	2001
4.63732	2149.14
4.63273	2113.87
4.63248	2085.65
4.61947	2064.49
4.61922	2036.27
4.68935	2233.79
4.68477	2198.52
4.68452	2170.3
4.68427	2142.09
4.67126	2120.92
4.67101	2092.7
4.7365	2247.9
4.73625	2219.69
4.736	2191.47
4.73575	2163.25
4.7355	2135.03
4.72249	2113.87
4.76264	2304.34
4.76239	2276.12
4.78779	2247.9
4.78754	2219.69
4.78732	2195
4.81443	2360.78
4.81418	2332.56
4.81393	2304.34
4.81368	2276.12
4.83908	2247.9
4.86665	2466.59
4.8664	2438.38
4.86615	2410.16
4.8659	2381.94
4.86566	2353.72
4.86541	2325.5
4.86519	2300.81
4.85215	2276.12
4.9185	2530.08
4.91825	2501.87
4.918	2473.65
4.91779	2448.96
4.90468	2417.21
4.90443	2388.99
4.90419	2360.78
4.904	2339.61
4.94867	2558.3
4.97066	2628.85
4.97041	2600.63
4.96967	2515.98
4.96948	2494.81
4.99656	2657.07
4.98299	2572.41
4.98274	2544.19
5.02245	2685.28
5.02195	2628.85
5.02174	2604.16
5.04909	2798.16
5.04884	2769.94
5.0486	2741.72
5.04835	2713.5
5.03503	2657.07
5.10565	2911.03
5.10107	2875.76
5.10082	2847.54
5.10057	2819.32
5.10035	2794.63
5.08737	2776.99
5.13167	2953.35
5.15844	3080.34
5.15385	3045.06
5.1536	3016.85
5.15335	2988.63
5.15696	2913.38
5.13966	2889.86
5.16587	2953.35
5.2067	3221.43
5.20645	3193.21
5.2062	3164.99
5.20595	3136.77
5.20573	3112.08
5.19263	3080.34
5.19238	3052.12
5.1922	3030.95
5.23687	3249.64
5.26011	3461.28
5.25986	3433.06
5.25961	3404.84
5.25936	3376.63
5.25911	3348.41
5.25886	3320.19
5.25861	3291.97
5.24504	3207.32
5.24479	3179.1
5.29027	3489.5
5.28413	3277.86
5.31754	3672.91
5.31295	3637.64
5.3127	3609.42
5.31245	3581.21
5.31221	3552.99
5.31196	3524.77
5.29845	3447.17
5.2982	3418.95
5.29795	3390.73
5.2977	3362.52
5.29745	3334.3
5.2972	3306.08
5.34405	3771.68
5.33947	3736.41
5.33922	3708.19
5.3663	3870.44
5.36605	3842.22
5.3658	3814
5.35173	3672.91
5.35148	3644.7
5.35123	3616.48
5.35098	3588.26
5.35074	3560.04
5.39771	4039.75
5.39313	4004.48
5.39288	3976.26
5.39263	3948.04
5.39238	3919.82
5.39216	3895.13
5.37844	3792.84
5.42448	4166.73
5.41989	4131.46
5.41964	4103.24
5.41939	4075.02
5.45074	4237.28
5.44616	4202
5.47423	4477.13
5.47398	4448.91
5.47373	4420.69
5.47348	4392.47
5.47324	4364.26
5.47299	4336.04
5.47274	4307.82
5.47249	4279.6
5.45867	4166.73
5.45842	4138.51
5.45817	4110.29
5.45792	4082.08
5.5054	4618.22
5.50081	4582.95
5.50056	4554.73
5.50031	4526.51
5.50009	4501.82
5.48506	4251.38
5.48481	4223.17
5.48463	4202
5.52814	4773.42
5.52789	4745.2
5.52764	4716.98
5.52739	4688.76
5.52714	4660.55
5.55602	5027.38
5.55577	4999.16
5.55552	4970.94
5.55527	4942.73
5.55503	4914.51
5.55478	4886.29
5.55453	4858.07
5.55428	4829.85
5.55403	4801.64
5.53978	4639.38
5.58768	5224.91
5.5831	5189.63
5.58285	5161.42
5.5826	5133.2
5.58235	5104.98
5.5821	5076.76
5.58188	5052.07
5.61142	5492.98
5.61117	5464.76
5.61092	5436.54
5.61067	5408.32
5.61042	5380.11
5.61018	5351.89
5.60993	5323.67
5.60968	5295.45
5.60943	5267.23
5.64005	5831.59
5.6398	5803.38
5.63956	5775.16
5.63931	5746.94
5.63906	5718.72
5.63881	5690.5
5.63856	5662.29
5.63831	5634.07
5.63806	5605.85
5.63781	5577.63
5.63756	5549.41
5.63731	5521.2
5.622	5239.02
5.62175	5210.8
5.6215	5182.58
5.67296	6170.21
5.66838	6134.94
5.66813	6106.72
5.66788	6078.5
5.66763	6050.28
5.66738	6022.07
5.66713	5993.85
5.66688	5965.63
5.66663	5937.41
5.66638	5909.19
5.66613	5880.98
5.66589	5852.76
5.64989	5492.98
5.64964	5464.76
5.69819	6607.59
5.69794	6579.37
5.69769	6551.15
5.69744	6522.94
5.6972	6494.72
5.69695	6466.5
5.6967	6438.28
5.69645	6410.06
5.6962	6381.85
5.69595	6353.63
5.6957	6325.41
5.69545	6297.19
5.6952	6268.97
5.69495	6240.76
5.69471	6212.54
5.73309	7171.95
5.7285	7136.68
5.72826	7108.46
5.72801	7080.24
5.72776	7052.02
5.72751	7023.81
5.72726	6995.59
5.72701	6967.37
5.72676	6939.15
5.72651	6910.93
5.72626	6882.72
5.72601	6854.5
5.72577	6826.28
5.72552	6798.06
5.72527	6769.84
5.72502	6741.63
5.72477	6713.41
5.72452	6685.19
5.72427	6656.97
5.72405	6632.28
5.70734	6191.37
5.76185	7524.68
5.75726	7489.4
5.75701	7461.19
5.75676	7432.97
5.75652	7404.75
5.75627	7376.53
5.75602	7348.31
5.75577	7320.1
5.75552	7291.88
5.75527	7263.66
5.75502	7235.44
5.75477	7207.22
5.7921	8046.71
5.78751	8011.44
5.78726	7983.22
5.78702	7955
5.78677	7926.78
5.78652	7898.57
5.78627	7870.35
5.78602	7842.13
5.78577	7813.91
5.78552	7785.69
5.78527	7757.47
5.78502	7729.26
5.78477	7701.04
5.78453	7672.82
5.78428	7644.6
5.78403	7616.38
5.78378	7588.17
5.78353	7559.95
5.81808	8568.74
5.81783	8540.53
5.81758	8512.31
5.81733	8484.09
5.81708	8455.87
5.81683	8427.65
5.81658	8399.44
5.81633	8371.22
5.81608	8343
5.81584	8314.78
5.81559	8286.56
5.81534	8258.35
5.81509	8230.13
5.81484	8201.91
5.81459	8173.69
5.81434	8145.47
5.81409	8117.25
5.81384	8089.04
5.7961	7531.73
5.84895	9161.32
5.8487	9133.1
5.84845	9104.89
5.8482	9076.67
5.84795	9048.45
5.84771	9020.23
5.84746	8992.01
5.84721	8963.8
5.84696	8935.58
5.84671	8907.36
5.84646	8879.14
5.84621	8850.92
5.84596	8822.71
5.84571	8794.49
5.84546	8766.27
5.84522	8738.05
5.84497	8709.83
5.84472	8681.62
5.84447	8653.4
5.84422	8625.18
5.84397	8596.96
5.82648	8067.87
5.88509	9866.77
5.88051	9831.5
5.88026	9803.28
5.88001	9775.06
5.87976	9746.85
5.87951	9718.63
5.87926	9690.41
5.87901	9662.19
5.87877	9633.97
5.87852	9605.76
5.87827	9577.54
5.87802	9549.32
5.87777	9521.1
5.87752	9492.88
5.87727	9464.67
5.87702	9436.45
5.87677	9408.23
5.87652	9380.01
5.87628	9351.79
5.87603	9323.58
5.87578	9295.36
5.87553	9267.14
5.87528	9238.92
5.87503	9210.7
5.87481	9186.01
5.91535	10388.8
5.91076	10353.5
5.91051	10325.3
5.91026	10297.1
5.91001	10268.9
5.90976	10240.7
5.90952	10212.4
5.90927	10184.2
5.90902	10156
5.90877	10127.8
5.90852	10099.6
5.90827	10071.4
5.90802	10043.1
5.90777	10014.9
5.90752	9986.7
5.90727	9958.48
5.90703	9930.26
5.90678	9902.05
5.94883	11277.7
5.94425	11242.4
5.944	11214.2
5.94375	11186
5.9435	11157.7
5.94325	11129.5
5.943	11101.3
5.94275	11073.1
5.94251	11044.9
5.94226	11016.7
5.94201	10988.4
5.94176	10960.2
5.94151	10932
5.94126	10903.8
5.94101	10875.6
5.94076	10847.3
5.94051	10819.1
5.94026	10790.9
5.94002	10762.7
5.93977	10734.5
5.93952	10706.3
5.93927	10678
5.93902	10649.8
5.93877	10621.6
5.93852	10593.4
5.93827	10565.2
5.93802	10537
5.93777	10508.7
5.93753	10480.5
5.93728	10452.3
5.93703	10424.1
5.91935	9873.83
5.97709	11574
5.97251	11538.7
5.97226	11510.5
5.97201	11482.3
5.97176	11454
5.97151	11425.8
5.97126	11397.6
5.97101	11369.4
5.97076	11341.2
5.97052	11312.9
6.00012	11277.7
5.99557	11245.9
5.98253	11221.2
5.98228	11193
5.98203	11164.8
5.98178	11136.6
5.98153	11108.4
5.98128	11080.1
5.9811	11059
6.01154	11602.2
6.01129	11574
6.01104	11545.7
6.01079	11517.5
6.0233	11482.3
6.02305	11454
6.0228	11425.8
6.02255	11397.6
6.0223	11369.4
6.02206	11341.2
6.02181	11312.9
6.05141	11277.7
6.04683	11242.4
6.04658	11214.2
6.04633	11186
6.04608	11157.7
6.04583	11129.5
6.04558	11101.3
6.04534	11073.1
6.04509	11044.9
6.04484	11016.7
6.04459	10988.4
6.04434	10960.2
6.04409	10932
6.04384	10903.8
6.04359	10875.6
6.04334	10847.3
6.04309	10819.1
6.04285	10790.9
6.0426	10762.7
6.02965	10748.6
6.06034	11320
6.06793	10727.4
6.06768	10699.2
6.06743	10671
6.06718	10642.8
6.06693	10614.6
6.06669	10586.3
6.06644	10558.1
6.06619	10529.9
6.06594	10501.7
6.06569	10473.5
6.06544	10445.2
6.06519	10417
6.06494	10388.8
6.06469	10360.6
6.06444	10332.4
6.0642	10304.2
6.06395	10275.9
6.0637	10247.7
6.06345	10219.5
6.0632	10191.3
6.06295	10163.1
6.0627	10134.8
6.06245	10106.6
6.0622	10078.4
6.06195	10050.2
6.06171	10022
6.06146	9993.75
6.06121	9965.54
6.06096	9937.32
6.06071	9909.1
6.06046	9880.88
6.06021	9852.66
6.05996	9824.45
6.05971	9796.23
6.08511	9768.01
6.08486	9739.79
6.08461	9711.57
6.08436	9683.36
6.08411	9655.14
6.08387	9626.92
6.08362	9598.7
6.08337	9570.48
6.08312	9542.27
6.08287	9514.05
6.08262	9485.83
6.08237	9457.61
6.08212	9429.39
6.08187	9401.18
6.08162	9372.96
6.08138	9344.74
6.08113	9316.52
6.08088	9288.3
6.08063	9260.09
6.08038	9231.87
6.08013	9203.65
6.07988	9175.43
6.07963	9147.21
6.07938	9119
6.07913	9090.78
6.07889	9062.56
6.07864	9034.34
6.07839	9006.12
6.07814	8977.9
6.07789	8949.69
6.07764	8921.47
6.07739	8893.25
6.10279	8865.03
6.10254	8836.81
6.10229	8808.6
6.10204	8780.38
6.10179	8752.16
6.10154	8723.94
6.10129	8695.72
6.10104	8667.51
6.1008	8639.29
6.10055	8611.07
6.1003	8582.85
6.10005	8554.63
6.0998	8526.42
6.09955	8498.2
6.0993	8469.98
6.09905	8441.76
6.0988	8413.54
6.09856	8385.33
6.09831	8357.11
6.09806	8328.89
6.09781	8300.67
6.09756	8272.45
6.09731	8244.24
6.09706	8216.02
6.09681	8187.8
6.09656	8159.58
6.09631	8131.36
6.09607	8103.15
6.09582	8074.93
6.09557	8046.71
6.09535	8022.02
6.12499	7990.27
6.1204	7955
6.12015	7926.78
6.11991	7898.57
6.11966	7870.35
6.11941	7842.13
6.11916	7813.91
6.11891	7785.69
6.11866	7757.47
6.11841	7729.26
6.11816	7701.04
6.11791	7672.82
6.11766	7644.6
6.11742	7616.38
6.11717	7588.17
6.11692	7559.95
6.11667	7531.73
6.11642	7503.51
6.11617	7475.29
6.11592	7447.08
6.11567	7418.86
6.11542	7390.64
6.11517	7362.42
6.11493	7334.2
6.11468	7305.99
6.11443	7277.77
6.11418	7249.55
6.11393	7221.33
6.11368	7193.11
6.11343	7164.9
6.11318	7136.68
6.11293	7108.46
6.11268	7080.24
6.11244	7052.02
6.09949	7037.92
6.13777	7016.75
6.13752	6988.53
6.13727	6960.32
6.13702	6932.1
6.13677	6903.88
6.13652	6875.66
6.13628	6847.44
6.13603	6819.23
6.13578	6791.01
6.13553	6762.79
6.13528	6734.57
6.13503	6706.35
6.13478	6678.14
6.13453	6649.92
6.15993	6621.7
6.15968	6593.48
6.15943	6565.26
6.15918	6537.04
6.15893	6508.83
6.15868	6480.61
6.15844	6452.39
6.15819	6424.17
6.15794	6395.95
6.15769	6367.74
6.15744	6339.52
6.15719	6311.3
6.15694	6283.08
6.15669	6254.86
6.15644	6226.65
6.15619	6198.43
6.15595	6170.21
6.1557	6141.99
6.15545	6113.77
6.1552	6085.56
6.15495	6057.34
6.1547	6029.12
6.15445	6000.9
6.1542	5972.68
6.15398	5947.99
6.18362	5916.25
6.17904	5880.98
6.17879	5852.76
6.17854	5824.54
6.17829	5796.32
6.17804	5768.1
6.17779	5739.89
6.17754	5711.67
6.1773	5683.45
6.17705	5655.23
6.1768	5627.01
6.17655	5598.8
6.1763	5570.58
6.17605	5542.36
6.1758	5514.14
6.17555	5485.92
6.1753	5457.71
6.17506	5429.49
6.17481	5401.27
6.20441	5366
6.19983	5330.72
6.19958	5302.51
6.19933	5274.29
6.19908	5246.07
6.19883	5217.85
6.19858	5189.63
6.19833	5161.42
6.19809	5133.2
6.19784	5104.98
6.19759	5076.76
6.19734	5048.54
6.18439	5034.43
6.22267	5013.27
6.22242	4985.05
6.22217	4956.84
6.22193	4928.62
6.22168	4900.4
6.22143	4872.18
6.22118	4843.96
6.22093	4815.74
6.22068	4787.53
6.22043	4759.31
6.22018	4731.09
6.21993	4702.87
6.21969	4674.65
6.21944	4646.44
6.21919	4618.22
6.21894	4590
6.21869	4561.78
6.21844	4533.56
6.21819	4505.35
6.21794	4477.13
6.21769	4448.91
6.21748	4424.22
6.24711	4392.47
6.24253	4357.2
6.24228	4328.98
6.27189	4293.71
6.2673	4258.44
6.26705	4230.22
6.26681	4202
6.26656	4173.78
6.26631	4145.57
6.26606	4117.35
6.26581	4089.13
6.26556	4060.91
6.26531	4032.69
6.26506	4004.48
6.26481	3976.26
6.26456	3948.04
6.26432	3919.82
6.26407	3891.6
6.26382	3863.39
6.26357	3835.17
6.25062	3821.06
6.2889	3799.9
6.28865	3771.68
6.2884	3743.46
6.28816	3715.24
6.28791	3687.02
6.28766	3658.81
6.28744	3634.11
6.31708	3602.37
6.31249	3567.1
6.31224	3538.88
6.312	3510.66
6.31175	3482.44
6.3115	3454.22
6.31125	3426.01
6.2983	3411.9
6.326	3644.7
6.33658	3390.73
6.33633	3362.52
6.33608	3334.3
6.33584	3306.08
6.33559	3277.86
6.33537	3253.17
6.36501	3221.43
6.36042	3186.15
6.36017	3157.94
6.35992	3129.72
6.35968	3101.5
6.35943	3073.28
6.34648	3059.17
6.38476	3038.01
6.38451	3009.79
6.38426	2981.57
6.38401	2953.35
6.38376	2925.14
6.38352	2896.92
6.38327	2868.7
6.38302	2840.48
6.38277	2812.26
6.39783	3066.23
6.40817	2784.05
6.40792	2755.83
6.40767	2727.61
6.40742	2699.39
6.40717	2671.17
6.40695	2646.48
6.43659	2614.74
6.43201	2579.47
6.43176	2551.25
6.46136	2515.98
6.45678	2480.7
6.45653	2452.48
6.45628	2424.27
6.45603	2396.05
6.48137	2360.78
6.48112	2332.56
6.48087	2304.34
6.48065	2279.65
6.49518	2473.65
6.49494	2445.43
6.49469	2417.21
6.49444	2388.99
6.51029	2247.9
6.5057	2212.63
6.50546	2184.41
6.53506	2149.14
6.53048	2113.87
6.51753	2099.76
6.56009	2078.6
6.5555	2043.32
6.54255	2029.21
6.56901	2120.92
6.58511	2008.05
6.58052	1972.78
6.58027	1944.56
6.56733	1930.45
6.59403	2050.38
6.60988	1909.29
6.6053	1874.01
6.59235	1859.91
6.63156	1944.56
6.63491	1838.74
6.63032	1803.47
6.63007	1775.25
6.64408	1909.29
6.64383	1881.07
6.65968	1739.98
6.65509	1704.71
6.68052	1680.02
6.71022	1655.33
6.70564	1620.05
6.70539	1591.83
6.70514	1563.62
6.73047	1528.34
6.74379	1584.78
6.74354	1556.56
6.75587	1500.13
6.78176	1528.34
6.78127	1471.91
6.78102	1443.69
6.78077	1415.47
6.78055	1390.78
6.79434	1500.13
6.83249	1464.85
6.83224	1436.64
6.832	1408.42
6.83175	1380.2
6.8315	1351.98
6.8704	1401.36
6.88297	1373.14
6.88273	1344.93
6.88251	1320.24
6.90787	1288.49
6.92094	1316.71
6.93754	1260.27
6.96282	1217.95
6.95823	1182.67
6.94528	1168.56
6.98456	1260.27
7.01423	1232.05
7.00964	1196.78
7.0094	1168.56
7.00915	1140.35
7.0089	1112.13
7.03429	1083.91
7.0483	1217.95
7.04805	1189.73
7.06062	1161.51
7.06038	1133.29
7.06013	1105.07
7.08562	1087.44
7.11582	1119.18
7.11534	1065.1
7.16308	1147.4
7.16283	1119.18
7.16258	1090.96
7.16233	1062.75
7.16208	1034.53
7.1619	1013.36
7.2008	1062.75
7.20055	1034.53
7.21313	1006.31
7.21291	981.62
7.26467	1034.53
7.26442	1006.31
7.28981	978.092
7.31564	999.256
7.34101	967.511
7.36687	992.201
7.39227	963.983
7.4181	985.147
7.42194	935.765
7.46945	992.201
7.4692	963.983
7.46896	935.765
7.46877	914.602
7.52489	978.092
7.52031	942.82
7.5073	921.656
7.50711	900.493
7.55909	978.092
7.57166	949.874
7.57147	928.711
7.62289	942.82
7.62264	914.602
7.62239	886.384
7.60944	872.275
7.64773	851.111
7.64754	829.948
7.66105	907.547
7.67362	879.329
7.69902	851.111
7.72485	872.275
7.72869	822.893
7.7241	787.621
7.72385	759.403
7.77583	837.002
7.77558	808.784
7.77533	780.566
7.76226	752.348
7.81417	822.893
7.82668	787.621
7.82643	759.403
7.82621	734.712
7.87803	794.675
7.87779	766.457
7.87757	741.766
7.93347	780.566
7.92889	745.294
7.9287	724.13
7.98055	787.621
7.9803	759.403
7.96736	745.294
8.00564	724.13
8.03197	801.73
8.03172	773.512
8.03147	745.294
8.05693	724.13
8.08307	780.566
8.08285	755.875
8.13901	822.893
8.13442	787.621
8.13418	759.403
8.18603	822.893
8.18578	794.675
8.18553	766.457
8.18528	738.239
8.24159	822.893
8.237	787.621
8.23682	766.457
8.28886	851.111
8.28861	822.893
8.28836	794.675
8.31475	879.329
8.34517	935.765
8.34058	900.493
8.32732	851.111
8.32707	822.893
8.36598	872.275
8.39683	978.092
8.39225	942.82
8.39203	918.129
8.37899	893.438
8.44478	1083.91
8.44453	1055.69
8.44428	1027.47
8.44407	1002.78
8.43102	978.092
8.43084	956.929
8.50066	1119.18
8.4961	1087.44
8.48306	1062.75
8.5224	1161.51
8.54786	1140.35
8.53473	1105.07
8.57884	1260.27
8.57425	1225
8.574	1196.78
8.56099	1175.62
8.6051	1330.82
8.60052	1295.55
8.62585	1260.27
8.61278	1232.05
8.65225	1344.93
8.652	1316.71
8.65175	1288.49
8.68291	1429.58
8.67833	1394.31
8.67808	1366.09
8.66438	1267.33
8.70918	1500.13
8.70459	1464.85
8.69065	1337.87
8.72996	1433.11
8.71686	1401.36
8.75707	1598.89
8.75682	1570.67
8.75657	1542.45
8.75632	1514.23
8.75607	1486.02
8.75585	1461.33
8.78296	1627.11
8.81413	1768.2
8.80954	1732.92
8.80929	1704.71
8.80904	1676.49
8.80879	1648.27
8.79554	1598.89
8.79529	1570.67
8.84064	1866.96
8.83606	1831.69
8.83581	1803.47
8.86288	1965.72
8.86264	1937.51
8.86239	1909.29
8.84838	1775.25
8.88928	2050.38
8.88903	2022.16
8.88878	1993.94
8.87496	1881.07
8.92169	2332.56
8.9171	2297.29
8.91685	2269.07
8.9166	2240.85
8.91635	2212.63
8.91611	2184.41
8.91586	2156.2
8.91561	2127.98
8.91536	2099.76
8.91514	2075.07
8.94443	2487.76
8.94418	2459.54
8.94393	2431.32
8.94368	2403.1
8.94343	2374.89
8.97206	2713.5
8.97181	2685.28
8.97157	2657.07
8.97132	2628.85
8.97107	2600.63
8.97082	2572.41
8.97057	2544.19
8.97032	2515.98
8.95607	2353.72
9.00348	2882.81
8.99889	2847.54
8.99864	2819.32
8.99839	2791.1
8.99814	2762.88
8.99793	2738.19
9.03767	2882.81
9.03742	2854.59
9.03717	2826.37
9.04975	2798.16
9.0495	2769.94
9.04925	2741.72
9.049	2713.5
9.04875	2685.28
9.0485	2657.07
9.04825	2628.85
9.048	2600.63
9.04775	2572.41
9.04751	2544.19
9.04726	2515.98
9.04701	2487.76
9.04676	2459.54
9.07215	2431.32
9.07191	2403.1
9.07166	2374.89
9.07141	2346.67
9.07116	2318.45
9.07091	2290.23
9.07066	2262.01
9.07041	2233.79
9.07016	2205.58
9.06991	2177.36
9.06967	2149.14
9.06942	2120.92
9.0692	2096.23
9.09884	2064.49
9.09425	2029.21
9.094	2001
9.09375	1972.78
9.09351	1944.56
9.09326	1916.34
9.09301	1888.12
9.12262	1852.85
9.11803	1817.58
9.11778	1789.36
9.11753	1761.14
9.10458	1747.03
9.14287	1725.87
9.14262	1697.65
9.14237	1669.43
9.14212	1641.22
9.15594	1754.09
9.16752	1613
9.16727	1584.78
9.16702	1556.56
9.16677	1528.34
9.16652	1500.13
9.19619	1471.91
9.1916	1436.64
9.19136	1408.42
9.19111	1380.2
9.20536	1542.45
9.20511	1514.23
9.22071	1344.93
9.22964	1387.25
9.24171	1302.6
9.24146	1274.38
9.25478	1330.82
9.27113	1246.16
9.29282	1281.44
9.29222	1214.42
9.30533	1246.16
9.32193	1189.73
9.31734	1154.46
9.31709	1126.24
9.3169	1105.07
9.36844	1133.29
9.3682	1105.07
9.36798	1080.38
9.39762	1048.64
9.39303	1013.36
9.39278	985.147
9.39253	956.929
9.41796	932.238
9.43156	1020.42
9.44407	985.147
9.44382	956.929
9.47343	921.656
9.49511	956.929
9.4987	879.329
9.50763	921.656
9.51973	840.529
9.54584	893.438
9.5456	865.22
9.5451	808.784
9.54488	784.093
9.57099	837.002
9.57024	752.348
9.57006	731.185
9.58406	865.22
9.58357	808.784
9.59614	780.566
9.62154	752.348
9.62129	724.13
9.63461	780.566
9.64678	706.494
9.67264	731.185
9.67648	681.803
9.70177	641.827
9.72368	702.967
9.72343	674.748
9.75304	639.476
9.74845	604.203
9.74824	579.513
9.76196	681.803
9.78736	653.585
9.79987	618.312
9.78692	604.203
9.8252	583.04
9.82499	558.349
9.85103	604.203
9.85467	531.307
9.87637	568.931
9.88944	597.149
9.90604	540.713
9.88876	519.549
9.95299	533.658
9.94005	519.549
9.97833	498.386
10.0038	473.695
10.0296	491.331
10.0334	446.653
10.0808	484.277
10.0805	456.059
10.0675	427.841
10.1319	470.168
10.1317	445.477
10.1572	420.786
10.1832	470.168
10.183	441.95
10.2127	413.732
10.2343	449.004
10.264	413.732
10.2594	381.986
10.2983	427.841
10.3108	399.623
10.3106	374.932
10.3621	392.568
10.3618	364.35
10.3489	350.241
10.3872	329.078
10.3869	304.387
10.4133	385.514
10.4131	357.296
10.4385	339.659
10.4645	371.405
10.4899	346.714
10.5158	371.405
10.5454	343.187
10.5409	311.441
10.5924	343.187
10.5923	322.023
10.6183	371.405
10.6437	343.187
10.6435	322.023
10.695	343.187
10.6948	314.969
10.7203	300.86
10.7505	329.078
10.7976	343.187
10.7974	314.969
10.8228	290.278
10.8489	343.187
10.8486	314.969
10.8741	293.805
10.9042	314.969
10.9259	350.241
10.9512	314.969
10.951	293.805
10.9771	336.132
11.0067	300.86
10.9894	279.696
11.0284	343.187
11.0538	314.969
11.0536	290.278
11.1051	314.969
11.1048	286.751
11.1047	265.587
11.1563	300.86
11.156	272.642
11.1815	251.478
11.2073	272.642
11.2587	286.751
11.2585	262.06
11.3099	272.642
11.3096	244.423
11.3655	272.642
11.3609	237.369
11.3479	223.26
11.4125	279.696
11.4123	251.478
11.4121	230.314
11.4638	272.642
11.4635	244.423
11.4633	219.733
11.5149	258.532
11.5147	230.314
11.5273	209.151
11.5662	258.532
11.566	230.314
11.5915	216.205
11.6173	237.369
11.6427	212.678
11.6686	237.369
11.694	205.624
11.72	251.478
11.7198	223.26
11.7711	223.26
11.7708	195.042
11.8224	230.314
11.8222	202.096
11.822	177.406
11.8736	216.205
11.8734	191.515
11.925	230.314
11.9248	205.624
11.9117	180.933
11.9764	237.369
11.9761	209.151
11.9631	187.987
12.0276	230.314
12.0274	205.624
12.0789	230.314
12.0786	202.096
12.0656	180.933
12.1302	237.369
12.13	212.678
12.1858	244.423
12.1813	209.151
12.2076	286.751
12.233	258.532
12.2328	233.842
12.2588	279.696
12.2884	244.423
12.2711	216.205
12.3354	237.369
12.3351	209.151
12.3222	195.042
12.3908	216.205
12.3735	195.042
12.4419	202.096
12.4246	180.933
12.489	209.151
12.4888	184.46
12.5402	202.096
12.54	173.878
12.527	152.715
12.5915	195.042
12.5912	166.824
12.5783	152.715
12.6428	202.096
12.6426	173.878
12.6296	152.715
12.694	195.042
12.6938	170.351
12.7453	187.987
12.7451	163.297
12.7966	187.987
12.7963	159.769
12.8218	142.133
12.8477	173.878
12.9033	173.878
12.886	152.715
12.9503	173.878
12.9501	152.715
12.9762	202.096
13.0059	173.878
12.9886	152.715
13.0532	209.151
13.053	180.933
13.0399	159.769
13.1044	195.042
13.0914	173.878
13.0912	152.715
13.1599	187.987
13.2069	195.042
13.2068	173.878
13.2626	202.096
13.2452	173.878
13.3098	223.26
13.3095	195.042
13.2966	180.933
13.3612	237.369
13.361	212.678
13.3479	187.987
13.3997	244.423
13.4123	216.205
13.4121	191.515
13.4638	244.423
13.4636	216.205
13.4634	191.515
13.4503	166.824
13.5149	216.205
13.5147	195.042
13.5663	230.314
13.566	202.096
13.5787	180.933
13.6219	230.314
13.6173	195.042
13.6691	258.532
13.6689	233.842
13.6559	209.151
13.6993	286.751
13.7203	251.478
13.7464	300.86
13.7462	272.642
13.7717	255.005
13.7848	286.751
13.823	258.532
13.8227	230.314
13.8226	209.151
13.8743	258.532
13.874	230.314
13.9255	251.478
13.9253	226.787
13.9767	244.423
13.9765	216.205
14.0324	258.532
14.0151	230.314
14.0667	272.642
14.0793	244.423
14.0791	216.205
14.1305	230.314
14.1303	205.624
14.1817	216.205
14.1814	191.515
14.2332	244.423
14.2329	216.205
14.2199	195.042
14.2844	230.314
14.2841	202.096
14.2839	180.933
14.3356	223.26
14.3354	198.569
14.3869	223.26
14.3867	198.569
14.4424	218.557
14.4251	195.042
14.4895	223.26
14.4893	202.096
14.5451	230.314
14.5405	198.569
14.5276	180.933
14.5922	244.423
14.592	216.205
14.5918	191.515
14.6433	223.26
14.6431	198.569
14.6947	230.314
14.6944	202.096
14.7502	230.314
14.7457	198.569
14.7973	230.314
14.797	205.624
14.8486	230.314
14.8355	209.151
14.8999	237.369
14.8997	216.205
14.9514	258.532
14.9511	230.314
14.9509	205.624
14.9635	180.933
15.0026	251.478
15.0024	223.26
14.9894	202.096
15.0537	230.314
15.0407	209.151
15.0796	258.532
15.105	233.842
15.1308	251.478
15.1562	219.733
15.1866	272.642
15.182	237.369
15.2335	265.587
15.2205	244.423
15.2848	265.587
15.2719	251.478
15.3102	230.314
15.3363	286.751
15.3361	258.532
15.3615	240.896
15.3917	272.642
15.4432	286.751
15.4386	255.005
15.4256	237.369
15.4902	293.805
15.49	265.587
15.4898	244.423
15.5417	307.914
15.5414	279.696
15.5412	255.005
15.5282	237.369
15.5972	300.86
15.5799	279.696
15.6444	329.078
15.6442	300.86
15.6312	279.696
15.6957	322.023
15.6954	293.805
15.7342	329.078
15.7468	300.86
15.8027	343.187
15.7853	314.969
15.7852	293.805
15.8498	350.241
15.8495	322.023
15.901	343.187
15.9008	314.969
15.9269	371.405
15.9523	343.187
15.952	314.969
15.9654	371.405
16.0079	343.187
16.0033	307.914
15.9903	293.805
16.0296	385.514
16.0551	364.35
16.0852	385.514
16.1366	399.623
16.132	364.35
16.119	350.241
16.1838	427.841
16.1836	399.623
16.1706	378.459
16.2394	427.841
16.2349	396.095
16.2867	456.059
16.2864	427.841
16.2862	406.677
16.338	456.059
16.3377	427.841
16.3375	406.677
16.3893	456.059
16.389	427.841
16.4145	406.677
16.4408	484.277
16.4406	459.586
16.4275	427.841
16.471	512.495
16.492	470.168
16.5224	526.604
16.5178	491.331
16.5696	554.822
16.5694	526.604
16.5692	501.913
16.5955	575.985
16.6208	540.713
16.6206	512.495
16.6076	491.331
16.651	568.931
16.6592	526.604
16.659	505.44
16.6982	597.149
16.698	568.931
16.6978	547.767
16.7241	625.367
16.7496	607.731
16.7756	639.476
16.8014	667.694
16.7882	618.312
16.8319	724.13
16.8273	688.858
16.827	653.585
16.8833	738.239
16.8659	710.021
16.8657	688.858
16.905	780.566
16.9352	808.784
16.9347	754.7
16.9174	731.185
16.987	865.22
16.9824	829.948
16.9822	805.257
16.9692	787.621
17.0389	935.765
17.0343	904.02
17.0213	879.329
17.0211	858.166
17.0908	1006.31
17.0863	974.565
17.0732	949.874
17.073	928.711
17.1168	1048.64
17.1428	1090.96
17.125	1006.31
17.1646	1133.29
17.151	1048.64
17.1508	1027.47
17.1905	1161.51
17.1772	1105.07
17.2209	1217.95
17.2163	1186.2
17.2031	1133.29
17.2431	1316.71
17.2429	1288.49
17.2426	1260.27
17.2736	1373.14
17.269	1337.87
17.2681	1242.64
17.3001	1471.91
17.2955	1436.64
17.2952	1408.42
17.2815	1302.6
17.2812	1274.38
17.3218	1514.23
17.352	1542.45
17.3344	1486.02
17.3342	1464.85
17.3783	1613
17.3737	1577.73
17.3602	1507.18
17.4005	1711.76
17.4003	1683.54
17.4	1655.33
17.4312	1796.42
17.4266	1761.14
17.4263	1732.92
17.4126	1627.11
17.4124	1605.94
17.4574	1866.96
17.4528	1831.69
17.456	1700
17.4387	1676.49
17.4792	1909.29
17.4782	1796.42
17.4779	1768.2
17.4649	1739.98
17.505	1930.45
17.5088	1881.07
17.4915	1852.85
17.4913	1824.63
17.5611	1993.94
17.5565	1958.67
17.5563	1930.45
17.5561	1902.23
17.5431	1888.12
17.5828	2029.21
17.5953	1993.94
17.6078	1958.67
17.6076	1930.45
17.6073	1902.23
17.6071	1874.01
17.6068	1845.8
17.6365	1812.88
17.6635	1965.72
17.6589	1930.45
17.6586	1902.23
17.6584	1874.01
17.6581	1845.8
17.6851	2001
17.6877	1810.52
17.6977	1965.72
17.6974	1937.51
17.6972	1909.29
17.7097	1874.01
17.7094	1845.8
17.7348	1810.52
17.7345	1782.31
17.7343	1761.14
17.7607	1838.74
17.7903	1810.52
17.773	1789.36
17.8166	1881.07
17.812	1845.8
17.8386	1951.61
17.8383	1923.4
17.8245	1810.52
17.8647	2008.05
17.8645	1979.83
17.8509	1895.18
17.8909	2064.49
17.8906	2036.27
17.8771	1951.61
17.8768	1923.4
17.9167	2085.65
17.9463	2050.38
17.9417	2015.11
17.9415	1986.89
17.9412	1958.67
17.941	1930.45
17.9407	1902.23
17.9405	1874.01
17.9701	1838.74
17.9655	1803.47
17.9526	1789.36
17.979	1881.07
17.9908	1768.2
17.9906	1739.98
17.9903	1711.76
17.9901	1683.54
17.9898	1655.33
17.9896	1627.11
17.9893	1598.89
17.9891	1570.67
17.9888	1542.45
17.9886	1514.23
18.0039	1796.42
18.014	1486.02
18.0137	1457.8
18.0135	1429.58
18.0132	1401.36
18.013	1373.14
18.0128	1348.45
18.0424	1316.71
18.0378	1281.44
18.0376	1253.22
18.0373	1225
18.0371	1196.78
18.0368	1168.56
18.0622	1133.29
18.0619	1105.07
18.0617	1076.86
18.0615	1052.16
18.0752	1161.51
18.0868	1020.42
18.0999	1048.64
18.1122	992.201
18.112	963.983
18.1117	935.765
18.1414	907.547
18.1756	907.547
18.1881	872.275
18.1878	844.057
18.1876	815.839
18.1874	794.675
18.2263	837.002
18.226	808.784
18.2386	780.566
18.2384	755.875
18.268	724.13
18.2634	692.385
18.315	717.076
18.3147	688.858
18.3018	674.748
18.3443	653.585
18.3397	618.312
18.3268	604.203
18.3915	674.748
18.3913	646.53
18.391	618.312
18.3908	590.094
18.3778	575.985
18.4204	557.173
18.4674	554.822
18.4671	526.604
18.4926	501.913
18.5056	526.604
18.5179	470.168
18.5438	491.331
18.5734	456.059
18.5987	418.435
18.6204	456.059
18.6458	427.841
18.6455	399.623
18.6589	456.059
18.671	381.986
18.697	413.732
18.6965	357.296
18.6834	336.132
18.7223	378.459
18.7476	343.187
18.7735	364.35
18.7988	329.078
18.8247	357.296
18.8242	300.86
18.8544	329.078
18.9014	329.078
18.9011	300.86
18.9527	329.078
18.9524	300.86
18.9522	276.169
19.0036	286.751
19.0033	258.532
19.0591	286.751
19.0546	251.478
19.0416	237.369
19.0935	300.86
19.106	272.642
19.1058	247.951
19.1572	258.532
19.157	233.842
19.2084	244.423
19.2081	219.733
19.2638	230.314
19.2465	209.151
19.3109	237.369
19.3106	209.151
19.3621	230.314
19.3619	202.096
19.3617	180.933
19.4135	237.369
19.4132	209.151
19.4002	187.987
19.469	230.314
19.4644	202.096
19.516	230.314
19.5157	202.096
19.5673	237.369
19.5671	212.678
19.6187	244.423
19.6184	216.205
19.6699	230.314
19.6697	209.151
19.6957	258.532
19.7211	230.314
19.7513	258.532
19.7595	223.26
19.7985	272.642
19.7982	244.423
19.8286	300.86
19.8758	314.969
19.8755	286.751
19.9271	314.969
19.9268	286.751
19.9522	262.06
19.9826	314.969
19.978	279.696
20.0296	307.914
20.0293	279.696
20.0163	258.532
20.0807	293.805
20.0805	265.587
20.0675	251.478
20.1318	272.642
20.1316	244.423
20.1831	265.587
20.1828	237.369
20.1826	216.205
20.2341	237.369
20.2211	216.205
20.2896	230.314
20.2723	209.151
20.3367	237.369
20.3365	212.678
20.388	237.369
20.3877	209.151
20.3875	187.987
20.4436	244.423
20.439	209.151
20.4388	184.46
20.4778	244.423
20.4904	216.205
20.4902	191.515
20.5417	216.205
20.5414	187.987
20.593	216.205
20.5927	191.515
20.6441	202.096
20.6439	177.406
20.6998	216.205
20.6953	184.46
20.6823	166.824
20.7468	216.205
20.7466	187.987
20.7982	230.314
20.798	202.096
20.785	180.933
20.8494	216.205
20.8364	195.042
20.9057	300.86
20.9011	265.587
20.9009	240.896
20.8879	216.205
20.9322	399.623
20.9277	364.35
20.9274	336.132
20.9583	441.95
20.9399	300.86
20.9802	512.495
20.98	484.277
20.9793	403.15
21.0053	449.004
21.0051	420.786
21.0304	378.459
21.0301	350.241
21.0597	314.969
21.0424	293.805
21.0807	272.642
21.0805	247.951
21.132	272.642
21.1318	244.423
21.1572	226.787
21.1831	251.478
21.1869	202.096
21.2339	195.042
21.221	180.933
21.2853	202.096
21.285	177.406
21.3105	152.715
21.3365	195.042
21.3363	170.351
21.3877	187.987
21.3875	159.769
21.4433	187.987
21.426	166.824
21.4686	148.012
21.4905	209.151
21.4902	180.933
21.5028	152.715
21.5417	202.096
21.5415	177.406
21.5929	195.042
21.5927	170.351
21.6441	180.933
21.6439	156.242
21.6955	195.042
21.6953	166.824
21.6823	152.715
21.7468	195.042
21.7466	166.824
21.7463	142.133
21.7979	173.878
21.7977	152.715
21.8535	176.23
21.9006	180.933
21.9003	156.242
21.8874	138.606
21.9519	187.987
21.9517	159.769
22.0075	187.987
21.9902	166.824
22.0546	202.096
22.0544	173.878
22.0542	152.715
22.1058	187.987
22.1317	216.205
22.1571	187.987
22.1826	170.351
22.2084	195.042
22.2338	170.351
22.2598	202.096
22.2852	173.878
22.3409	187.987
22.3363	159.769
22.3879	195.042
22.3877	166.824
22.4435	190.339
22.4261	159.769
22.4906	202.096
22.4904	177.406
22.5421	223.26
22.5418	195.042
22.5288	173.878
22.5286	152.715
22.5933	216.205
22.593	187.987
22.6192	244.423
22.6318	223.26
22.6707	265.587
22.6704	240.896
22.7092	272.642
22.7218	244.423
22.7472	223.26
22.773	244.423
22.7985	223.26
22.8243	237.369
22.8496	202.096
22.8755	230.314
22.901	212.678
22.9269	244.423
22.9523	216.205
22.9825	244.423
23.0036	212.678
23.0338	244.423
23.0549	216.205
23.081	272.642
23.0808	244.423
23.1366	272.642
23.1193	251.478
23.1837	286.751
23.1836	265.587
23.2396	314.969
23.235	279.696
23.2907	300.86
23.2734	279.696
23.3423	331.429
23.3249	300.86
23.3893	329.078
[truncated: 1,677 more rows]

## Sheet: SG-10-Glycolated
2Theta	Counts (I)
3.11809	1450.76
3.1135	1415.65
3.10056	1401.61
3.14311	1380.55
3.13856	1348.96
3.16535	1478.84
3.1651	1450.76
3.16486	1422.67
3.19035	1405.12
3.21677	1492.88
3.21652	1464.8
3.2163	1440.23
3.25523	1492.88
3.26781	1464.8
3.26756	1436.72
3.26731	1408.63
3.31935	1492.88
3.3191	1464.8
3.31885	1436.72
3.3186	1408.63
3.31835	1380.55
3.37064	1492.88
3.37039	1464.8
3.37014	1436.72
3.36996	1415.65
3.4218	1478.84
3.42156	1450.76
3.42134	1426.18
3.47359	1535
3.47334	1506.92
3.47309	1478.84
3.47285	1450.76
3.47263	1426.18
3.52482	1527.98
3.52457	1499.9
3.52435	1475.33
3.51131	1450.76
3.51107	1422.67
3.57617	1535
3.57592	1506.92
3.57571	1482.35
3.60206	1563.08
3.63173	1535
3.62715	1499.9
3.6269	1471.82
3.62665	1443.74
3.61371	1429.7
3.65348	1577.12
3.68315	1549.04
3.67856	1513.94
3.67832	1485.86
3.67807	1457.78
3.67785	1433.21
3.73004	1535
3.72979	1506.92
3.71672	1478.84
3.75593	1563.08
3.78133	1535
3.78108	1506.92
3.80722	1563.08
3.83306	1584.14
3.8369	1535
3.83234	1503.41
3.88881	1605.21
3.88425	1573.61
3.87121	1549.04
3.87097	1520.96
3.87078	1499.9
3.91482	1647.33
3.93582	1605.21
3.93557	1577.12
3.96624	1661.37
3.96165	1626.27
3.96527	1551.38
3.98702	1594.68
4.01332	1668.39
4.01307	1640.31
4.01282	1612.23
4.03816	1577.12
4.03791	1549.04
4.03772	1527.98
4.06882	1661.37
4.06423	1626.27
4.05123	1605.21
4.11633	1717.53
4.11608	1689.45
4.11583	1661.37
4.10276	1633.29
4.14241	1766.68
4.14216	1738.59
4.1675	1703.49
4.16725	1675.41
4.19388	1787.74
4.19364	1759.66
4.19339	1731.57
4.22003	1843.9
4.21978	1815.82
4.24521	1791.25
4.23217	1766.68
4.27156	1871.98
4.27132	1843.9
4.27107	1815.82
4.30223	1956.23
4.29764	1921.13
4.29739	1893.04
4.29653	1794.76
4.32703	1860.28
4.30966	1829.86
4.34893	1921.13
4.34869	1893.04
4.36126	1864.96
4.40115	2026.43
4.4009	1998.35
4.40066	1970.27
4.40041	1942.19
4.40016	1914.1
4.39994	1889.53
4.45306	2096.64
4.45281	2068.55
4.45257	2040.47
4.45235	2015.9
4.43925	1984.31
4.43906	1963.25
4.5051	2180.88
4.50485	2152.8
4.5046	2124.72
4.50435	2096.64
4.50411	2068.55
4.4911	2047.49
4.55663	2208.96
4.55639	2180.88
4.55614	2152.8
4.54313	2131.74
4.58705	2265.13
4.5825	2233.53
4.63506	2377.45
4.63481	2349.37
4.63456	2321.29
4.63434	2296.72
4.62131	2272.15
4.6612	2433.62
4.66095	2405.53
4.69211	2545.94
4.68752	2510.84
4.68728	2482.76
4.68703	2454.68
4.71837	2616.15
4.71379	2581.05
4.74012	2658.27
4.7263	2545.94
4.72605	2517.86
4.72587	2496.8
4.77053	2714.43
4.76595	2679.33
4.76557	2637.21
4.79704	2812.72
4.79246	2777.62
4.79221	2749.54
4.8238	2939.09
4.81922	2903.99
4.81897	2875.9
4.81872	2847.82
4.80479	2721.45
4.85056	3065.46
4.84598	3030.35
4.84573	3002.27
4.84548	2974.19
4.8728	3163.74
4.87255	3135.66
4.87231	3107.58
4.85806	2946.11
4.90371	3276.07
4.89913	3240.97
4.89888	3212.88
4.89866	3188.31
4.88494	3086.52
4.93047	3402.44
4.92589	3367.33
4.92564	3339.25
4.92539	3311.17
4.95345	3584.97
4.95321	3556.89
4.95296	3528.8
4.95271	3500.72
4.95246	3472.64
4.95222	3444.56
4.93797	3283.09
4.98133	3837.7
4.98108	3809.62
4.98083	3781.54
4.98059	3753.46
4.98034	3725.38
4.98009	3697.29
4.97984	3669.21
4.97959	3641.13
4.97935	3613.05
4.96485	3423.5
5.01174	3893.87
5.00716	3858.76
4.99192	3584.97
4.99167	3556.89
4.99143	3528.8
5.03974	4160.64
5.03516	4125.54
5.03491	4097.46
5.03466	4069.38
5.03442	4041.29
5.03417	4013.21
5.03392	3985.13
5.03367	3957.05
5.03342	3928.97
5.01967	3823.66
5.06297	4371.25
5.06272	4343.17
5.06248	4315.09
5.06223	4287.01
5.06198	4258.93
5.06173	4230.85
5.06149	4202.76
5.09413	4511.66
5.08955	4476.56
5.0893	4448.48
5.08905	4420.4
5.08883	4395.83
5.07412	4181.7
5.11934	4946.93
5.11909	4918.85
5.11885	4890.77
5.1186	4862.68
5.11835	4834.6
5.1181	4806.52
5.11786	4778.44
5.11761	4750.36
5.11736	4722.28
5.11711	4694.19
5.11686	4666.11
5.11662	4638.03
5.11637	4609.95
5.11612	4581.87
5.11587	4553.79
5.14747	5227.75
5.14722	5199.67
5.14697	5171.58
5.14672	5143.5
5.14647	5115.42
5.14623	5087.34
5.14598	5059.26
5.14573	5031.18
5.14548	5003.09
5.14524	4975.01
5.12851	4532.72
5.17584	5536.65
5.17559	5508.56
5.17534	5480.48
5.17509	5452.4
5.17485	5424.32
5.1746	5396.24
5.17435	5368.16
5.1741	5340.07
5.17385	5311.99
5.17361	5283.91
5.17336	5255.83
5.20619	6070.2
5.20594	6042.12
5.20569	6014.04
5.20545	5985.95
5.2052	5957.87
5.20495	5929.79
5.2047	5901.71
5.20445	5873.63
5.20421	5845.54
5.20396	5817.46
5.20371	5789.38
5.20346	5761.3
5.20322	5733.22
5.20297	5705.14
5.20272	5677.05
5.20247	5648.97
5.20222	5620.89
5.20198	5592.81
5.20173	5564.73
5.23456	6379.1
5.23431	6351.02
5.23406	6322.93
5.23382	6294.85
5.23357	6266.77
5.23332	6238.69
5.23307	6210.61
5.23283	6182.53
5.23258	6154.44
5.23233	6126.36
5.23208	6098.28
5.27142	7165.39
5.26683	7130.28
5.26659	7102.2
5.26634	7074.12
5.26609	7046.04
5.26584	7017.96
5.26559	6989.87
5.26535	6961.79
5.2651	6933.71
5.26485	6905.63
5.2646	6877.55
5.26436	6849.47
5.26411	6821.38
5.26386	6793.3
5.26361	6765.22
5.26336	6737.14
5.26312	6709.06
5.26287	6680.98
5.26262	6652.89
5.26237	6624.81
5.26213	6596.73
5.26188	6568.65
5.26163	6540.57
5.26138	6512.49
5.26113	6484.4
5.26089	6456.32
5.26064	6428.24
5.26042	6403.67
5.30165	7684.9
5.29706	7649.79
5.29681	7621.71
5.29657	7593.63
5.29632	7565.55
5.29607	7537.47
5.29582	7509.39
5.29558	7481.3
5.29533	7453.22
5.29508	7425.14
5.29483	7397.06
5.29458	7368.98
5.29434	7340.9
5.29409	7312.81
5.29384	7284.73
5.29359	7256.65
5.29335	7228.57
5.2931	7200.49
5.33336	8372.9
5.32878	8337.8
5.32853	8309.72
5.32828	8281.63
5.32804	8253.55
5.32779	8225.47
5.32754	8197.39
5.32729	8169.31
5.32704	8141.22
5.3268	8113.14
5.32655	8085.06
5.3263	8056.98
5.32605	8028.9
5.32581	8000.82
5.32556	7972.73
5.32531	7944.65
5.32506	7916.57
5.32481	7888.49
5.32457	7860.41
5.32432	7832.33
5.32407	7804.24
5.32382	7776.16
5.32358	7748.08
5.32333	7720
5.36204	9201.31
5.3618	9173.23
5.36155	9145.15
5.3613	9117.06
5.36105	9088.98
5.3608	9060.9
5.36056	9032.82
5.36031	9004.74
5.36006	8976.66
5.35981	8948.57
5.35957	8920.49
5.35932	8892.41
5.35907	8864.33
5.35882	8836.25
5.35857	8808.17
5.35833	8780.08
5.35808	8752
5.35783	8723.92
5.35758	8695.84
5.35734	8667.76
5.35709	8639.68
5.35684	8611.59
5.35659	8583.51
5.35634	8555.43
5.3561	8527.35
5.35585	8499.27
5.3556	8471.19
5.35535	8443.1
5.35511	8415.02
5.39537	10071.8
5.39512	10043.8
5.39487	10015.7
5.39463	9987.6
5.39438	9959.52
5.39413	9931.43
5.39388	9903.35
5.39363	9875.27
5.39339	9847.19
5.39314	9819.11
5.39289	9791.03
5.39264	9762.94
5.3924	9734.86
5.39215	9706.78
5.3919	9678.7
5.39165	9650.62
5.3914	9622.54
5.39116	9594.45
5.39091	9566.37
5.39066	9538.29
5.39041	9510.21
5.39017	9482.13
5.38992	9454.05
5.38967	9425.96
5.38942	9397.88
5.38917	9369.8
5.38893	9341.72
5.38868	9313.64
5.38843	9285.55
5.38818	9257.47
5.38794	9229.39
5.36774	8393.96
5.43099	10717.7
5.4264	10682.6
5.42616	10654.5
5.42591	10626.5
5.42566	10598.4
5.42541	10570.3
5.42516	10542.2
5.42492	10514.1
5.42467	10486
5.42442	10458
5.42417	10429.9
5.42393	10401.8
5.42368	10373.7
5.42343	10345.6
5.42318	10317.6
5.42293	10289.5
5.42269	10261.4
5.42244	10233.3
5.42219	10205.2
5.42194	10177.1
5.4217	10149.1
5.42145	10121
5.42123	10096.4
5.45769	11321.5
5.45744	11293.4
5.45719	11265.3
5.45694	11237.2
5.45669	11209.2
5.45645	11181.1
5.4562	11153
5.45595	11124.9
5.4557	11096.8
5.45546	11068.7
5.45521	11040.7
5.45496	11012.6
5.45471	10984.5
5.45446	10956.4
5.45422	10928.3
5.45397	10900.3
5.45372	10872.2
5.45347	10844.1
5.45323	10816
5.45298	10787.9
5.45273	10759.8
5.48531	11546.1
5.48507	11518.1
5.48482	11490
5.48457	11461.9
5.48432	11433.8
5.48407	11405.7
5.48383	11377.6
5.48358	11349.6
5.46537	10738.8
5.50898	11321.5
5.50873	11293.4
5.50848	11265.3
5.50823	11237.2
5.50799	11209.2
5.50774	11181.1
5.50749	11153
5.50724	11124.9
5.50699	11096.8
5.50678	11072.3
5.52353	11518.1
5.52329	11490
5.52304	11461.9
5.52279	11433.8
5.52254	11405.7
5.52229	11377.6
5.52205	11349.6
5.53642	11040.7
5.53183	11005.6
5.53159	10977.5
5.53134	10949.4
5.53109	10921.3
5.53084	10893.2
5.5306	10865.2
5.53035	10837.1
5.5301	10809
5.52985	10780.9
5.5296	10752.8
5.52936	10724.7
5.52911	10696.7
5.52886	10668.6
5.52861	10640.5
5.52837	10612.4
5.52812	10584.3
5.52787	10556.3
5.52762	10528.2
5.52737	10500.1
5.52713	10472
5.52688	10443.9
5.51393	10429.9
5.55221	10408.8
5.55197	10380.7
5.55172	10352.7
5.55147	10324.6
5.55122	10296.5
5.55098	10268.4
5.55073	10240.3
5.55048	10212.3
5.55023	10184.2
5.54998	10156.1
5.54974	10128
5.54949	10099.9
5.54924	10071.8
5.54899	10043.8
5.54875	10015.7
5.5485	9987.6
5.54825	9959.52
5.548	9931.43
5.54775	9903.35
5.54751	9875.27
5.54726	9847.19
5.54701	9819.11
5.54676	9791.03
5.54652	9762.94
5.54627	9734.86
5.54602	9706.78
5.54577	9678.7
5.54552	9650.62
5.54528	9622.54
5.54503	9594.45
5.54478	9566.37
5.54453	9538.29
5.54429	9510.21
5.54404	9482.13
5.54379	9454.05
5.54354	9425.96
5.54329	9397.88
5.54305	9369.8
5.5428	9341.72
5.54258	9317.15
5.57222	9285.55
5.56764	9250.45
5.56739	9222.37
5.56714	9194.29
5.56689	9166.21
5.56665	9138.13
5.5664	9110.04
5.56615	9081.96
5.5659	9053.88
5.56566	9025.8
5.56541	8997.72
5.56516	8969.64
5.56491	8941.55
5.56466	8913.47
5.56442	8885.39
5.56417	8857.31
5.56392	8829.23
5.56367	8801.15
5.56343	8773.06
5.56318	8744.98
5.56293	8716.9
5.56268	8688.82
5.56243	8660.74
5.56219	8632.65
5.56194	8604.57
5.56169	8576.49
5.56144	8548.41
5.5612	8520.33
5.56095	8492.25
5.5607	8464.16
5.56045	8436.08
5.5602	8408
5.55996	8379.92
5.58957	8344.82
5.58498	8309.72
5.58474	8281.63
5.58449	8253.55
5.58424	8225.47
5.58399	8197.39
5.58374	8169.31
5.5835	8141.22
5.58325	8113.14
5.583	8085.06
5.58275	8056.98
5.58251	8028.9
5.58226	8000.82
5.58201	7972.73
5.58176	7944.65
5.58151	7916.57
5.58127	7888.49
5.58102	7860.41
5.58077	7832.33
5.58052	7804.24
5.58028	7776.16
5.58003	7748.08
5.57978	7720
5.57953	7691.92
5.57928	7663.84
5.57904	7635.75
5.57879	7607.67
5.57854	7579.59
5.57829	7551.51
5.57805	7523.43
5.5778	7495.35
5.57755	7467.26
5.5773	7439.18
5.57705	7411.1
5.56411	7397.06
5.60239	7376
5.60214	7347.92
5.60189	7319.83
5.60165	7291.75
5.6014	7263.67
5.60115	7235.59
5.6009	7207.51
5.60065	7179.43
5.60041	7151.34
5.60016	7123.26
5.59991	7095.18
5.59966	7067.1
5.59942	7039.02
5.59917	7010.94
5.59892	6982.85
5.59867	6954.77
5.59842	6926.69
5.59818	6898.61
5.59793	6870.53
5.59768	6842.45
5.59743	6814.36
5.59719	6786.28
5.59694	6758.2
5.59669	6730.12
5.59644	6702.04
5.59619	6673.96
5.59595	6645.87
5.5957	6617.79
5.59545	6589.71
5.5952	6561.63
5.59496	6533.55
5.59471	6505.47
5.59446	6477.38
5.59421	6449.3
5.59396	6421.22
5.59375	6396.65
5.62339	6365.06
5.6188	6329.95
5.61856	6301.87
5.61831	6273.79
5.61806	6245.71
5.61781	6217.63
5.61757	6189.55
5.61732	6161.46
5.61707	6133.38
5.61682	6105.3
5.61657	6077.22
5.61633	6049.14
5.61608	6021.06
5.64569	5985.95
5.64111	5950.85
5.64086	5922.77
5.64061	5894.69
5.64036	5866.61
5.64011	5838.52
5.63987	5810.44
5.63962	5782.36
5.63937	5754.28
5.63912	5726.2
5.63887	5698.12
5.63863	5670.03
5.63838	5641.95
5.63813	5613.87
5.63788	5585.79
5.63764	5557.71
5.63739	5529.63
5.63714	5501.54
5.63689	5473.46
5.63664	5445.38
5.66625	5410.28
5.66167	5375.18
5.66142	5347.09
5.66118	5319.01
5.66093	5290.93
5.66068	5262.85
5.66043	5234.77
5.66018	5206.69
5.65994	5178.6
5.68955	5143.5
5.68496	5108.4
5.68471	5080.32
5.68447	5052.24
5.68422	5024.15
5.68397	4996.07
5.68372	4967.99
5.68348	4939.91
5.68323	4911.83
5.68298	4883.75
5.68273	4855.66
5.68248	4827.58
5.68224	4799.5
5.68199	4771.42
5.68174	4743.34
5.68149	4715.26
5.68125	4687.17
5.681	4659.09
5.71061	4623.99
5.70602	4588.89
5.70578	4560.81
5.70553	4532.72
5.70528	4504.64
5.70503	4476.56
5.70478	4448.48
5.70454	4420.4
5.70429	4392.32
5.70404	4364.23
5.70379	4336.15
5.70355	4308.07
5.73316	4272.97
5.72857	4237.87
5.72832	4209.78
5.72808	4181.7
5.72783	4153.62
5.72758	4125.54
5.72733	4097.46
5.72708	4069.38
5.72684	4041.29
5.72659	4013.21
5.72634	3985.13
5.71339	3971.09
5.75168	3950.03
5.75143	3921.95
5.75118	3893.87
5.75093	3865.78
5.75069	3837.7
5.75044	3809.62
5.75019	3781.54
5.77559	3753.46
5.77534	3725.38
5.77509	3697.29
5.77484	3669.21
5.7746	3641.13
5.77435	3613.05
5.7741	3584.97
5.77385	3556.89
5.77361	3528.8
5.77339	3504.23
5.78866	3781.54
5.80303	3472.64
5.79845	3437.54
5.7982	3409.46
5.79795	3381.37
5.7977	3353.29
5.82731	3318.19
5.82273	3283.09
5.82248	3255.01
5.82223	3226.92
5.82198	3198.84
5.82174	3170.76
5.82149	3142.68
5.82124	3114.6
5.82099	3086.52
5.82075	3058.43
5.8205	3030.35
5.80755	3016.31
5.84583	2995.25
5.85915	3051.41
5.8589	3023.33
5.87123	2967.17
5.87098	2939.09
5.87073	2911.01
5.87049	2882.92
5.87024	2854.84
5.86999	2826.76
5.89539	2798.68
5.89514	2770.6
5.89489	2742.52
5.89465	2714.43
5.8944	2686.35
5.9198	2658.27
5.91955	2630.19
5.9193	2602.11
5.91905	2574.02
5.9188	2545.94
5.91856	2517.86
5.91834	2493.29
5.93311	2714.43
5.93287	2686.35
5.94798	2461.7
5.9434	2426.6
5.96873	2391.49
5.96848	2363.41
5.96827	2338.84
5.98205	2447.66
5.9818	2419.58
5.99363	2307.25
6.01946	2328.31
6.02331	2279.17
6.01872	2244.06
6.01847	2215.98
6.01823	2187.9
6.01798	2159.82
6.01773	2131.74
6.01748	2103.66
6.00454	2089.62
6.04282	2068.55
6.05688	2208.96
6.05663	2180.88
6.05638	2152.8
6.05614	2124.72
6.06865	2089.62
6.07249	2040.47
6.06791	2005.37
6.06766	1977.29
6.09299	1942.19
6.09278	1917.61
6.10606	1970.27
6.12242	1886.02
6.10513	1864.96
6.13134	1928.15
6.14769	1843.9
6.14311	1808.8
6.15661	1886.02
6.18201	1857.94
6.18176	1829.86
6.18151	1801.78
6.19409	1773.7
6.19384	1745.61
6.19359	1717.53
6.19334	1689.45
6.1931	1661.37
6.19285	1633.29
6.22252	1605.21
6.20524	1584.14
6.24352	1563.08
6.2433	1538.51
6.25684	1619.25
6.25659	1591.16
6.27294	1506.92
6.26842	1478.84
6.30726	1520.96
6.31977	1485.86
6.31953	1457.78
6.31928	1429.7
6.31903	1401.61
6.31878	1373.53
6.31857	1348.96
6.35756	1408.63
6.37007	1373.53
6.36983	1345.45
6.36958	1317.37
6.36933	1289.29
6.39894	1254.18
6.42068	1296.31
6.45035	1268.23
6.43307	1247.16
6.47135	1226.1
6.47111	1198.02
6.47089	1173.45
6.49629	1145.37
6.50957	1198.02
6.52215	1169.94
6.52165	1113.78
6.5214	1085.69
6.52122	1064.63
6.54755	1141.86
6.57288	1106.76
6.57263	1078.67
6.55969	1064.63
6.60224	1043.57
6.61116	1085.69
6.62752	1001.45
6.63644	1043.57
6.64858	966.347
6.67447	994.429
6.70408	959.326
6.6868	938.265
6.72937	919.544
6.75103	952.306
6.77637	917.204
6.77612	889.122
6.77587	861.04
6.78944	945.286
6.80557	835.299
6.82729	875.081
6.85269	847
6.85244	818.918
6.85222	794.346
6.87852	868.061
6.87768	773.285
6.90385	832.959
6.90361	804.877
6.90314	752.224
6.93328	776.795
6.94244	847
6.95496	811.897
6.98029	776.795
6.98011	755.734
7.00619	804.877
7.03158	776.795
7.03134	748.714
7.06175	804.877
7.05683	731.162
7.08702	762.754
7.09594	804.877
7.10805	724.142
7.12134	776.795
7.13392	748.714
7.16359	720.632
7.18462	682.019
7.215	734.673
7.21045	703.081
7.23668	769.775
7.26202	734.673
7.26177	706.591
7.29148	683.19
7.31771	748.714
7.31312	713.611
7.33858	692.55
7.369	748.714
7.36444	717.122
7.4162	769.775
7.41595	741.693
7.41577	720.632
7.4717	762.754
7.46712	727.652
7.46687	699.571
7.45392	685.53
7.52312	776.795
7.51853	741.693
7.51835	720.632
7.5448	811.897
7.55731	776.795
7.56982	741.693
7.56958	713.611
7.56933	685.53
7.60823	734.673
7.62074	699.571
7.62049	671.489
7.60755	657.448
7.64583	636.387
7.67197	692.55
7.67172	664.468
7.70144	641.067
7.72308	671.489
7.75268	636.387
7.7481	601.285
7.73515	587.244
7.77437	671.489
7.79964	629.366
7.79939	601.285
7.78644	587.244
7.85074	608.305
7.8505	580.223
7.83749	559.162
7.90631	608.305
7.90176	576.713
7.95351	629.366
7.95326	601.285
7.95305	576.713
7.94007	559.162
7.99192	622.346
8.00449	594.264
8.00424	566.182
8.05603	622.346
8.05578	594.264
8.04277	573.203
8.08192	650.428
8.11159	622.346
8.10704	590.754
8.13352	685.53
8.13327	657.448
8.15864	625.856
8.18878	650.428
8.21479	692.55
8.24009	652.768
8.22279	629.366
8.26231	748.714
8.26206	720.632
8.26181	692.55
8.27439	664.468
8.31372	762.754
8.31347	734.673
8.3004	706.591
8.30022	685.53
8.33961	790.836
8.37003	847
8.36544	811.897
8.36928	762.754
8.35194	734.673
8.41754	903.163
8.41729	875.081
8.41708	850.51
8.44343	931.245
8.4736	959.326
8.47313	905.503
8.45576	875.081
8.45557	854.02
8.49559	1029.53
8.49534	1001.45
8.52601	1085.69
8.52142	1050.59
8.50792	973.367
8.50773	952.306
8.53393	1015.49
8.57352	1141.86
8.5733	1117.29
8.5602	1085.69
8.55995	1057.61
8.55977	1036.55
8.59966	1198.02
8.59941	1169.94
8.63007	1254.18
8.62549	1219.08
8.61199	1141.86
8.6118	1120.8
8.65609	1296.31
8.638	1183.98
8.68136	1254.18
8.67681	1222.59
8.66383	1205.04
8.70385	1380.55
8.7036	1352.47
8.70335	1324.39
8.70311	1296.31
8.73402	1408.63
8.76053	1506.92
8.75595	1471.82
8.7557	1443.74
8.75929	1366.51
8.74201	1345.45
8.76821	1408.63
8.80854	1619.25
8.80829	1591.16
8.80804	1563.08
8.80782	1538.51
8.79472	1506.92
8.79454	1485.86
8.83517	1731.57
8.83493	1703.49
8.83468	1675.41
8.83443	1647.33
8.86584	1815.82
8.86125	1780.72
8.861	1752.63
8.88832	1942.19
8.88807	1914.1
8.88783	1886.02
8.88758	1857.94
8.87352	1717.53
8.92072	2223
8.91613	2187.9
8.91589	2159.82
8.91564	2131.74
8.91539	2103.66
8.91514	2075.57
8.9149	2047.49
8.91465	2019.41
8.9144	1991.33
8.91418	1966.76
8.90022	1836.88
8.94698	2293.21
8.9424	2258.11
8.9712	2616.15
8.97096	2588.07
8.97071	2559.98
8.97046	2531.9
8.97021	2503.82
8.96997	2475.74
8.96972	2447.66
8.96947	2419.58
8.96922	2391.49
8.96897	2363.41
8.96873	2335.33
8.95491	2223
8.95473	2201.94
9.00385	2925.05
8.99927	2889.94
8.99902	2861.86
8.99877	2833.78
8.99852	2805.7
8.99827	2777.62
8.99803	2749.54
8.99778	2721.45
8.99753	2693.37
8.99728	2665.29
8.99707	2640.72
8.9813	2307.25
9.03804	2925.05
9.05062	2896.96
9.05037	2868.88
9.05012	2840.8
9.04987	2812.72
9.04963	2784.64
9.04938	2756.56
9.04913	2728.47
9.04888	2700.39
9.04864	2672.31
9.04839	2644.23
9.04814	2616.15
9.07354	2588.07
9.07329	2559.98
9.07304	2531.9
9.07279	2503.82
9.07255	2475.74
9.0723	2447.66
9.07205	2419.58
9.0718	2391.49
9.07155	2363.41
9.07131	2335.33
9.07109	2310.76
9.10073	2279.17
9.09615	2244.06
9.0959	2215.98
9.09565	2187.9
9.0954	2159.82
9.09516	2131.74
9.09491	2103.66
9.09466	2075.57
9.09441	2047.49
9.11975	2012.39
9.1195	1984.31
9.11925	1956.23
9.119	1928.15
9.11876	1900.06
9.11851	1871.98
9.11826	1843.9
9.13282	2040.47
9.14366	1815.82
9.14344	1791.25
9.17308	1759.66
9.1685	1724.55
9.16825	1696.47
9.1553	1682.43
9.19359	1661.37
9.19334	1633.29
9.19309	1605.21
9.19284	1577.12
9.21824	1549.04
9.21799	1520.96
9.21774	1492.88
9.21753	1468.31
9.24293	1440.23
9.26879	1464.8
9.26829	1408.63
9.26804	1380.55
9.26783	1355.98
9.29846	1436.72
9.3194	1387.57
9.31915	1359.49
9.3189	1331.41
9.30595	1317.37
9.34851	1296.31
9.33123	1275.25
9.36951	1254.18
9.36926	1226.1
9.36905	1201.53
9.38258	1282.27
9.39869	1169.94
9.3941	1134.84
9.39392	1113.78
9.4247	1212.06
9.44998	1169.94
9.44539	1134.84
9.4589	1212.06
9.475	1099.73
9.49675	1141.86
9.52214	1113.78
9.52189	1085.69
9.52165	1057.61
9.54704	1029.53
9.54683	1004.96
9.57312	1078.67
9.57288	1050.59
9.57229	983.898
9.59821	1015.49
9.62361	987.408
9.62336	959.326
9.63668	1015.49
9.65303	931.245
9.64851	903.163
9.67471	966.347
9.70432	931.245
9.68698	903.163
9.73864	945.286
9.75121	917.204
9.75097	889.122
9.78064	861.04
9.76329	832.959
9.80232	896.143
9.82766	861.04
9.82747	839.979
9.85355	889.122
9.88322	861.04
9.87864	825.938
9.93011	847
9.92986	818.918
9.95532	797.857
9.98146	854.02
9.98122	825.938
10.0108	790.836
9.99354	769.775
10.0368	832.959
10.0579	794.346
10.0842	875.081
10.084	847
10.0837	818.918
10.1134	790.836
10.1351	825.938
10.1604	790.836
10.1474	769.775
10.1908	847
10.1735	818.918
10.2379	854.02
10.2377	832.959
10.294	917.204
10.2895	882.102
10.2892	857.53
10.2762	832.959
10.3416	973.367
10.3413	945.286
10.3411	917.204
10.3408	892.632
10.3278	868.061
10.3969	945.286
10.3923	910.183
10.3921	885.612
10.4189	1015.49
10.4186	987.408
10.449	1043.57
10.4312	959.326
10.4708	1085.69
10.4573	1008.47
10.5014	1169.94
10.4968	1134.84
10.4966	1106.76
10.4963	1071.65
10.5234	1240.14
10.5232	1212.06
10.5501	1352.47
10.5498	1324.39
10.5496	1296.31
10.5493	1268.23
10.5357	1183.98
10.5355	1155.9
10.5619	1240.14
10.5617	1219.08
10.602	1422.67
10.6017	1394.59
10.6015	1366.51
10.6012	1338.43
10.601	1310.35
10.6007	1282.27
10.6281	1478.84
10.6279	1450.76
10.6533	1422.67
10.6531	1401.61
10.6793	1471.82
10.6791	1443.74
10.7087	1408.63
10.7041	1373.53
10.6912	1359.49
10.7294	1338.43
10.7292	1310.35
10.7425	1366.51
10.7546	1282.27
10.7544	1254.18
10.7541	1226.1
10.7677	1310.35
10.7795	1198.02
10.7793	1169.94
10.779	1141.86
10.7788	1113.78
10.8042	1085.69
10.8039	1057.61
10.8037	1029.53
10.8172	1113.78
10.8291	1001.45
10.8288	973.367
10.8286	945.286
10.8283	920.714
10.8537	889.122
10.8535	864.551
10.8668	917.204
10.8831	832.959
10.8786	797.857
10.8656	783.816
10.9039	762.754
10.9036	734.673
10.9034	706.591
10.9032	682.019
10.917	790.836
10.9329	655.108
10.9422	748.714
10.9547	713.611
10.9545	685.53
10.9841	650.428
10.9668	629.366
11.0094	608.305
11.0048	573.203
11.0183	650.428
11.0301	538.101
11.0299	517.039
11.056	559.162
11.0856	524.06
11.0683	502.999
11.1066	481.937
11.1064	457.366
11.1196	510.019
11.1318	429.284
11.145	481.937
11.1576	453.856
11.1571	401.202
11.1829	418.753
11.1826	376.631
11.2341	397.692
11.2338	369.61
11.2336	345.039
11.2462	320.467
11.2723	369.61
11.2848	341.529
11.3102	313.447
11.3361	334.508
11.3657	299.406
11.4128	313.447
11.4126	285.365
11.4641	313.447
11.4639	285.365
11.4637	260.794
11.489	229.202
11.5152	285.365
11.5149	257.284
11.5536	285.365
11.5662	257.284
11.566	236.222
11.6176	264.304
11.6173	236.222
11.6469	203.46
11.6687	243.243
11.6941	222.181
11.7199	243.243
11.7454	218.671
11.7755	243.243
11.7965	204.63
11.8224	229.202
11.8478	201.12
11.878	229.202
11.8775	175.379
11.9251	243.243
11.9249	215.161
11.9763	236.222
11.9761	208.141
12.0016	187.079
12.0274	215.161
12.053	201.12
12.0831	229.202
12.1042	194.1
12.1345	243.243
12.13	208.141
12.1689	257.284
12.1814	229.202
12.1812	201.12
12.2067	187.079
12.2369	217.501
12.284	222.181
12.2837	194.1
12.3352	215.161
12.3349	187.079
12.3605	173.038
12.3863	194.1
12.4375	187.079
12.4373	166.018
12.4932	201.12
12.4887	169.528
12.5401	187.079
12.5399	158.998
12.5914	187.079
12.5911	158.998
12.6427	187.079
12.6424	158.998
12.6938	173.038
12.6937	151.977
12.7451	166.018
12.7449	141.446
12.7319	123.895
12.7966	187.079
12.7963	158.998
12.8218	141.446
12.852	173.038
12.8602	137.936
12.8991	187.079
12.8989	158.998
12.9115	137.936
12.9504	180.059
12.9501	155.487
13.0016	173.038
13.0014	148.467
13.0529	180.059
13.0527	151.977
13.1084	173.038
13.1039	144.957
13.1429	201.12
13.1555	173.038
13.1553	151.977
13.2069	187.079
13.1938	158.998
13.2582	187.079
13.258	166.018
13.3096	208.141
13.3094	180.059
13.3609	201.12
13.3607	176.549
13.4123	215.161
13.4121	190.589
13.4637	229.202
13.4635	204.63
13.5022	229.202
13.5147	201.12
13.5146	180.059
13.5662	215.161
13.5659	190.589
13.6176	229.202
13.6173	201.12
13.6171	176.549
13.6435	257.284
13.6689	229.202
13.6558	201.12
13.7205	271.324
13.7203	243.243
13.7073	222.181
13.7718	264.304
13.7588	250.263
13.8014	229.202
13.7968	197.61
13.8528	243.243
13.8482	211.651
13.9039	229.202
13.8994	194.1
13.9511	250.263
13.9509	222.181
13.9379	201.12
14.0023	236.222
14.0021	211.651
14.0534	215.161
14.0789	194.1
14.109	217.501
14.1605	243.243
14.1559	208.141
14.2075	236.222
14.2072	208.141
14.207	187.079
14.2631	243.243
14.2458	215.161
14.2456	194.1
14.3102	250.263
14.3099	222.181
14.3613	236.222
14.3611	211.651
14.417	243.243
14.4124	211.651
14.4684	257.284
14.4638	225.692
14.4509	208.141
14.5154	257.284
14.5152	232.712
14.5667	257.284
14.5664	229.202
14.5663	208.141
14.5926	285.365
14.6223	257.284
14.605	236.222
14.6693	257.284
14.669	229.202
14.6951	278.345
14.7205	253.773
14.772	271.324
14.7717	243.243
14.8234	285.365
14.8232	260.794
14.8747	285.365
14.8744	257.284
14.8999	236.222
14.9262	313.447
14.926	285.365
14.9258	260.794
14.9818	313.447
14.9645	292.386
15.0288	313.447
15.0286	285.365
15.0845	329.828
15.0671	299.406
15.067	278.345
15.136	355.57
15.1315	323.978
15.1832	369.61
15.1829	341.529
15.1699	320.467
15.2389	385.991
15.2216	362.59
15.2606	425.774
15.286	397.692
15.2857	369.61
15.3119	425.774
15.3416	400.032
15.3242	369.61
15.3633	439.815
15.3935	467.896
15.393	414.073
15.445	495.978
15.4405	464.386
15.4275	446.835
15.4924	538.101
15.4922	513.529
15.4791	481.937
15.5485	594.264
15.5439	562.672
15.5309	538.101
15.5747	664.468
15.5701	629.366
15.5827	601.285
15.6224	734.673
15.6221	706.591
15.609	678.509
15.6088	650.428
15.6745	832.959
15.6743	804.877
15.674	776.795
15.6738	752.224
15.6608	727.652
15.7047	861.04
15.7269	959.326
15.7267	931.245
15.7264	903.163
15.7571	987.408
15.739	875.081
15.7388	854.02
15.7838	1113.78
15.7793	1078.67
15.779	1050.59
15.7788	1022.51
15.7653	952.306
15.8104	1212.06
15.8058	1176.96
15.8055	1148.88
15.7913	987.408
15.8587	1366.51
15.8585	1338.43
15.8582	1310.35
15.858	1282.27
15.8577	1254.18
15.8575	1229.61
15.8444	1198.02
15.8442	1169.94
15.8854	1478.84
15.8851	1450.76
15.8849	1422.67
15.8846	1394.59
15.912	1591.16
15.9118	1563.08
15.9115	1535
15.9113	1506.92
15.9422	1619.25
15.9639	1661.37
15.9504	1577.12
15.9501	1549.04
15.9901	1717.53
15.9898	1689.45
15.9766	1640.31
16.0161	1766.68
16.0159	1738.59
16.0195	1663.71
16.0455	1703.49
16.0665	1661.37
16.0663	1633.29
16.0796	1689.45
16.0917	1605.21
16.0914	1577.12
16.1211	1549.04
16.1165	1513.94
16.13	1591.16
16.1418	1478.84
16.1416	1454.27
16.1554	1563.08
16.1551	1535
16.1549	1506.92
16.167	1426.18
16.1929	1450.76
16.1924	1394.59
16.1921	1366.51
16.1919	1338.43
16.1916	1310.35
16.2054	1422.67
16.2213	1282.27
16.204	1261.2
16.243	1324.39
16.2423	1240.14
16.2421	1215.57
16.2684	1289.29
16.2681	1261.2
16.2717	1183.98
16.2544	1162.92
16.2806	1226.1
16.297	1141.86
16.3312	1141.86
16.3438	1113.78
16.3435	1085.69
16.3732	1057.61
16.3686	1022.51
16.3557	1008.47
16.4073	1043.57
16.4198	1015.49
16.4196	987.408
16.445	959.326
16.4447	931.245
16.4445	906.673
16.4699	875.081
16.4835	959.326
16.496	931.245
16.4958	903.163
16.4953	850.51
16.5212	875.081
16.5207	818.918
16.5204	790.836
16.5202	762.754
16.5465	839.979
16.5328	741.693
16.5761	804.877
16.5716	773.285
16.585	847
16.623	790.836
16.6228	762.754
16.6482	734.673
16.6615	790.836
16.674	755.734
16.6778	706.591
16.6733	671.489
16.673	646.917
16.7252	741.693
16.7249	713.611
16.7545	678.509
16.7372	657.448
16.7763	720.632
16.8017	692.55
16.8313	664.468
16.8141	643.407
16.8785	678.509
16.8782	650.428
16.9037	625.856
16.9338	650.428
16.9591	610.645
16.968	650.428
17.0062	622.346
17.006	594.264
17.032	643.407
17.0315	576.713
17.0616	608.305
17.1088	622.346
17.1085	594.264
17.134	573.203
17.1603	650.428
17.1601	622.346
17.1598	594.264
17.2115	636.387
17.2112	608.305
17.211	580.223
17.2365	559.162
17.2629	650.428
17.2627	622.346
17.2624	594.264
17.2921	568.523
17.3181	608.305
17.3398	650.428
17.3391	569.693
17.3261	545.121
17.3652	622.346
17.365	594.264
17.3776	573.203
17.4165	615.325
17.4163	590.754
17.4721	622.346
17.4675	587.244
17.4673	562.672
17.5192	636.387
17.519	608.305
17.5188	587.244
17.5494	664.468
17.5576	629.366
17.6011	706.591
17.5965	671.489
17.5963	646.917
17.6522	692.55
17.6349	664.468
17.6347	643.407
17.6995	720.632
17.6992	692.55
17.7254	748.714
17.7558	804.877
17.7512	769.775
17.738	720.632
17.7378	699.571
17.808	903.163
17.8034	868.061
17.8032	843.489
17.7901	818.918
17.7899	790.836
17.83	973.367
17.8297	945.286
17.8568	1113.78
17.8566	1085.69
17.8563	1057.61
17.8561	1029.53
17.8558	1001.45
17.8423	917.204
17.8837	1254.18
17.8835	1226.1
17.8832	1198.02
17.883	1169.94
17.8827	1141.86
17.9096	1282.27
17.9354	1303.33
17.9393	1254.18
17.9348	1226.1
17.9735	1254.18
17.9732	1226.1
17.9858	1198.02
17.9856	1169.94
17.9853	1141.86
17.9851	1113.78
17.9848	1085.69
17.9846	1057.61
17.9844	1033.04
18.014	1001.45
18.0094	966.347
18.0092	938.265
18.0089	910.183
17.996	896.143
18.0342	875.081
18.034	847
18.0338	822.428
18.0634	790.836
18.0588	755.734
18.0459	741.693
18.0884	720.632
18.0839	685.53
18.1092	650.428
18.109	629.366
18.1351	678.509
18.1477	650.428
18.1602	622.346
18.16	597.774
18.1855	576.713
18.1986	608.305
18.2152	552.142
18.1979	531.08
18.2623	566.182
18.2621	538.101
18.2619	513.529
18.3134	545.121
18.3132	517.039
18.3002	495.978
18.3518	538.101
18.3644	510.019
18.3642	481.937
18.3639	453.856
18.4156	495.978
18.4153	467.896
18.4151	439.815
18.4406	425.774
18.4667	474.917
18.4664	446.835
18.4919	422.264
18.5178	453.856
18.5173	397.692
18.5432	425.774
18.5686	397.692
18.5684	376.631
18.5945	425.774
18.6241	397.692
18.6196	369.61
18.6585	411.733
18.671	383.651
18.6708	355.57
18.6834	334.508
18.7223	383.651
18.7221	355.57
18.7476	338.018
18.7734	362.59
18.7988	334.508
18.8247	355.57
18.8501	327.488
18.8631	355.57
18.8755	306.427
18.9014	327.488
18.9268	302.916
18.9526	320.467
18.9779	285.365
19.0038	313.447
19.0335	287.705
19.0806	299.406
19.0804	278.345
19.1318	285.365
19.1315	257.284
19.1576	306.427
19.183	271.324
19.1828	250.263
19.2343	278.345
19.2341	257.284
19.2855	271.324
19.2853	250.263
19.3369	278.345
19.3366	250.263
19.3237	236.222
19.3882	278.345
19.3879	250.263
19.375	236.222
19.4394	271.324
19.4392	243.243
19.439	222.181
19.4653	299.406
19.495	271.324
19.4777	250.263
19.5421	285.365
19.5419	257.284
19.5416	232.712
19.5976	271.324
19.593	236.222
19.58	222.181
19.6446	278.345
19.6444	250.263
19.7004	299.406
19.6958	267.814
19.6828	243.243
19.7519	327.488
19.7473	292.386
19.7343	271.324
19.7989	320.467
19.7986	292.386
19.7856	271.324
19.8501	313.447
19.8371	292.386
19.876	341.529
19.9019	369.61
19.8886	320.467
19.9316	346.209
19.9787	355.57
19.9785	327.488
20.0089	383.651
20.0039	309.937
20.0341	341.529
20.0551	299.406
20.081	320.467
20.1106	287.705
20.0933	264.304
20.1366	327.488
20.1619	290.046
20.1708	327.488
20.2133	299.406
20.196	278.345
20.2604	313.447
20.2602	285.365
20.2472	264.304
20.3117	313.447
20.3115	288.875
20.3672	299.406
20.3626	264.304
20.3496	250.263
20.4142	299.406
20.4139	271.324
20.4137	250.263
20.4654	292.386
20.4652	267.814
20.521	299.406
20.5037	271.324
20.5035	250.263
20.568	299.406
20.5678	271.324
20.5804	250.263
20.6193	292.386
20.619	264.304
20.6705	285.365
20.6703	260.794
20.7007	313.447
20.7217	274.835
20.7477	320.467
20.7475	292.386
20.7729	264.304
20.7989	306.427
20.7987	278.345
20.8503	313.447
20.85	285.365
20.837	264.304
20.8804	341.529
20.9064	383.651
20.9057	299.406
20.8884	271.324
20.9327	453.856
20.9281	418.753
20.9275	348.549
20.955	552.142
20.9547	524.06
20.9545	495.978
20.9406	383.651
20.9816	664.468
20.9813	636.387
20.9811	608.305
20.9808	580.223
20.9671	474.917
21.0062	552.142
21.006	527.57
21.0193	580.223
21.0357	495.978
21.0311	460.876
21.0308	432.794
21.0696	467.896
21.0821	432.794
21.0819	404.713
21.0816	376.631
21.0814	348.549
21.1333	418.753
21.133	390.672
21.1201	376.631
21.1627	355.57
21.1454	334.508
21.1843	390.672
21.2097	355.57
21.2351	330.998
21.261	355.57
21.2906	327.488
21.2861	299.406
21.3124	369.61
21.3377	334.508
21.3375	306.427
21.3245	292.386
21.3889	327.488
21.3887	299.406
21.4184	276.005
21.4656	299.406
21.4654	274.835
21.504	285.365
21.5165	257.284
21.542	232.712
21.5678	257.284
21.5975	229.202
21.593	201.12
21.6448	264.304
21.6446	236.222
21.6316	222.181
21.6832	257.284
21.6958	229.202
21.6956	204.63
21.7471	229.202
21.7469	204.63
21.7985	236.222
21.7982	208.141
21.7853	194.1
21.8496	215.161
21.8493	187.079
21.9009	222.181
21.9007	194.1
21.8877	180.059
21.9564	215.161
21.9519	183.569
21.9389	166.018
22.0036	229.202
22.0033	201.12
21.9903	180.059
22.0591	229.202
22.0545	194.1
22.1104	229.202
22.1058	194.1
22.0929	180.059
22.1574	222.181
22.1444	208.141
22.187	189.419
22.2087	222.181
22.2383	189.419
22.2599	222.181
22.2896	187.079
22.3411	215.161
22.3366	187.079
22.3881	215.161
22.3879	187.079
22.4395	222.181
22.4392	194.1
22.4263	180.059
[truncated: 1,682 more rows]

## Sheet: SG-10-Heated
2Theta	Counts (I)
3.3995	1870.04
3.39941	1860.15
3.39932	1850.27
3.39924	1840.38
3.39915	1830.49
3.39906	1820.61
3.39898	1810.72
3.39889	1800.84
3.3988	1790.95
3.39871	1781.06
3.39863	1771.18
3.42532	1889.81
3.42523	1879.92
3.43797	1870.04
3.43788	1860.15
3.43779	1850.27
3.43771	1840.38
3.43762	1830.49
3.45035	1820.61
3.45027	1810.72
3.45018	1800.84
3.45009	1790.95
3.45	1781.06
3.44992	1771.18
3.44983	1761.29
3.44975	1752.64
3.47957	1741.52
3.47519	1729.16
3.4751	1719.28
3.47502	1709.39
3.48878	1815.67
3.48869	1805.78
3.4886	1795.89
3.48852	1786.01
3.48843	1776.12
3.48834	1766.24
3.48825	1756.35
3.50055	1697.03
3.50047	1687.15
3.52653	1734.11
3.52644	1724.22
3.52635	1714.33
3.52626	1704.45
3.5303	1677.26
3.51314	1669.85
3.5518	1692.09
3.55154	1662.43
3.55145	1652.55
3.55136	1642.66
3.55128	1632.78
3.5512	1624.13
3.57779	1731.64
3.57771	1721.75
3.57762	1711.86
3.57753	1701.98
3.57736	1682.21
3.57727	1672.32
3.57675	1613
3.57666	1603.12
3.57657	1593.23
3.57649	1583.35
3.60309	1692.09
3.60283	1662.43
3.60274	1652.55
3.60265	1642.66
3.60257	1632.78
3.60248	1622.89
3.60204	1573.46
3.60196	1563.57
3.60187	1553.69
3.6018	1546.27
3.62865	1682.21
3.62856	1672.32
3.62804	1613
3.62795	1603.12
3.62786	1593.23
3.62778	1583.35
3.64156	1692.09
3.6413	1662.43
3.64121	1652.55
3.64112	1642.66
3.65386	1632.78
3.65377	1622.89
3.65333	1573.46
3.65325	1563.57
3.66651	1613
3.66642	1603.12
3.66633	1593.23
3.66624	1583.35
3.68308	1553.69
3.6787	1541.33
3.67861	1531.45
3.67852	1521.56
3.66566	1516.62
3.70458	1568.52
3.70406	1509.2
3.73441	1558.63
3.73003	1546.27
3.72994	1536.39
3.72986	1526.5
3.72977	1516.62
3.73389	1499.32
3.72951	1486.96
3.72942	1477.07
3.75496	1464.72
3.75487	1454.83
3.75478	1444.94
3.75469	1435.06
3.78128	1541.33
3.78119	1531.45
3.7811	1521.56
3.78102	1511.67
3.78093	1501.79
3.78084	1491.9
3.78075	1482.02
3.78067	1472.13
3.78453	1425.17
3.78014	1412.81
3.8062	1459.77
3.80612	1449.89
3.80603	1440
3.80568	1400.46
3.8056	1391.81
3.83647	1499.32
3.83209	1486.96
3.832	1477.07
3.83191	1467.19
3.83586	1430.12
3.83148	1417.76
3.83139	1407.87
3.83542	1380.69
3.83104	1368.33
3.84463	1454.83
3.84454	1444.94
3.8612	1395.51
3.86085	1355.97
3.85647	1343.61
3.85638	1333.73
3.88279	1420.23
3.8827	1410.34
3.88244	1380.69
3.88235	1370.8
3.88192	1321.37
3.88183	1311.48
3.88174	1301.6
3.88166	1291.71
3.90861	1440
3.90852	1430.12
3.90826	1400.46
3.90817	1390.57
3.90791	1360.91
3.90782	1351.03
3.90774	1341.14
3.90765	1331.26
3.90722	1283.06
3.92126	1420.23
3.92117	1410.34
3.92091	1380.69
3.92082	1370.8
3.93321	1321.37
3.93312	1311.48
3.93303	1301.6
3.93295	1291.71
3.93278	1273.18
3.95911	1351.03
3.95903	1341.14
3.95894	1331.26
3.9585	1281.83
3.9845	1321.37
3.98441	1311.48
3.98432	1301.6
3.98424	1291.71
3.98408	1274.41
3.99741	1331.26
4.00979	1281.83
4.03561	1301.6
4.03553	1291.71
4.03535	1271.94
4.03526	1262.05
4.03518	1252.17
4.03509	1242.28
4.06108	1281.83
4.06065	1232.4
4.06056	1222.51
4.06047	1212.63
4.06039	1202.74
4.0603	1192.85
4.06021	1182.97
4.06015	1175.55
4.07382	1271.94
4.07373	1262.05
4.08645	1249.7
4.08636	1239.81
4.11617	1227.45
4.11179	1215.1
4.1117	1205.21
4.11161	1195.32
4.11152	1185.44
4.11144	1175.55
4.11135	1165.67
4.11126	1155.78
4.14107	1143.42
4.13669	1131.07
4.13661	1122.42
4.1631	1217.57
4.16301	1207.68
4.16292	1197.8
4.16284	1187.91
4.16275	1178.02
4.16266	1168.14
4.16257	1158.25
4.18813	1148.37
4.18805	1138.48
4.18796	1128.59
4.20157	1217.57
4.20148	1207.68
4.21419	1195.32
4.21411	1185.44
4.21402	1175.55
4.21393	1165.67
4.21384	1155.78
4.21779	1118.71
4.21341	1106.35
4.21332	1096.47
4.21323	1086.58
4.21315	1076.69
4.21306	1066.81
4.22656	1143.42
4.23929	1133.54
4.26485	1123.65
4.26476	1113.77
4.26468	1103.88
4.26459	1093.99
4.2645	1084.11
4.26441	1074.22
4.26434	1065.57
4.29058	1133.54
4.28989	1054.45
4.2898	1044.56
4.31649	1163.2
4.3164	1153.31
4.31632	1143.42
4.31614	1123.65
4.31605	1113.77
4.31597	1103.88
4.31588	1093.99
4.31579	1084.11
4.3157	1074.22
4.31562	1064.34
4.31536	1034.68
4.30247	1027.26
4.32905	1133.54
4.34118	1054.45
4.34109	1044.56
4.35426	1084.11
4.35417	1074.22
4.36691	1064.34
4.35385	1037.15
4.39244	1051.98
4.39236	1042.09
4.41789	1029.74
4.41781	1019.85
4.41772	1009.96
4.41763	1000.08
4.41756	991.428
4.4438	1059.39
4.44371	1049.51
4.44363	1039.62
4.45636	1029.74
4.45627	1019.85
4.45619	1009.96
4.4561	1000.08
4.46883	990.192
4.46875	980.306
4.46866	970.42
4.46857	960.534
4.46849	950.648
4.4684	940.763
4.46831	930.877
4.46822	920.991
4.48098	913.576
4.52021	1000.08
4.52013	990.192
4.52004	980.306
4.51995	970.42
4.51986	960.534
4.51978	950.648
4.54592	1007.49
4.54961	940.763
4.54523	928.405
4.54514	918.519
4.55864	995.135
4.55855	985.249
4.57128	975.363
4.5712	965.477
4.57111	955.591
4.57067	906.162
4.55779	898.747
4.59667	945.706
4.59658	935.82
4.59649	925.934
4.59641	916.048
4.60975	975.363
4.60967	965.477
4.62238	953.12
4.62624	906.162
4.62186	893.804
4.62177	883.919
4.62169	875.268
4.64791	940.763
4.64783	930.877
4.64774	920.991
4.66082	950.648
4.67757	911.105
4.67319	898.747
4.6731	888.862
4.67302	878.976
4.67293	869.09
4.67284	859.204
4.67275	849.318
4.67267	839.432
4.67259	830.782
4.69905	923.462
4.71177	911.105
4.71168	901.219
4.72441	891.333
4.72433	881.447
4.72424	871.561
4.72415	861.675
4.72407	851.789
4.72398	841.903
4.72389	832.018
4.7238	822.132
4.72373	813.481
4.77998	891.333
4.7756	878.976
4.77551	869.09
4.77542	859.204
4.77533	849.318
4.77525	839.432
4.77517	830.782
4.81404	876.504
4.81395	866.618
4.82667	854.261
4.82658	844.375
4.82649	834.489
4.82641	824.603
4.81354	819.66
4.85622	812.246
4.83905	804.831
4.88208	836.96
4.8777	824.603
4.88173	797.417
4.87735	785.059
4.87727	776.409
4.90323	812.246
4.91632	841.903
4.91623	832.018
4.92897	822.132
4.92881	804.831
4.9588	812.246
4.98037	834.489
4.98028	824.603
4.98431	797.417
4.97993	785.059
4.99299	812.246
5.00974	772.702
5.00536	760.345
4.99249	755.402
5.03089	747.987
5.0308	738.101
5.05671	767.759
5.05662	757.873
5.08218	747.987
5.0821	738.101
5.08201	728.215
5.08192	718.33
5.08183	708.444
5.08175	698.558
5.08166	688.672
5.08157	678.786
5.08148	668.9
5.0814	659.014
5.10792	757.873
5.13391	797.417
5.13382	787.531
5.13373	777.645
5.13365	767.759
5.13347	747.987
5.13339	738.101
5.1333	728.215
5.13321	718.33
5.13312	708.444
5.13305	699.793
5.16348	757.873
5.16287	688.672
5.1585	677.55
5.1847	740.573
5.18461	730.687
5.18452	720.801
5.18444	710.915
5.18435	701.029
5.19706	688.672
5.23614	757.873
5.23605	747.987
5.23597	738.101
5.23588	728.215
5.23579	718.33
5.23572	709.679
5.26126	698.558
5.26118	688.672
5.26109	678.786
5.29136	718.33
5.28697	705.972
5.29092	668.9
5.27376	661.486
5.31286	733.158
5.31251	693.615
5.31242	683.729
5.31216	654.071
5.31208	645.421
5.33842	723.273
5.33833	713.387
5.33824	703.501
5.33798	673.843
5.33789	663.957
5.3638	693.615
5.36371	683.729
5.36345	654.071
5.36337	645.421
5.38953	703.501
5.38927	673.843
5.38918	663.957
5.40227	693.615
5.40218	683.729
5.41902	654.071
5.41465	644.185
5.44479	668.9
5.45321	654.071
5.46594	644.185
5.46586	634.299
5.46577	624.413
5.46568	614.528
5.4656	604.642
5.45271	597.227
5.51754	678.786
5.51745	668.9
5.51737	659.014
5.51728	649.128
5.51719	639.242
5.5171	629.356
5.50419	619.47
5.50411	609.585
5.55601	678.786
5.55592	668.9
5.55583	659.014
5.55575	649.128
5.56848	639.242
5.56839	629.356
5.56831	619.47
5.56822	609.585
5.56814	600.934
5.5937	591.048
5.61984	646.657
5.61975	636.771
5.61966	626.885
5.61958	616.999
5.61949	607.113
5.6194	597.227
5.62352	579.927
5.60634	570.041
5.67104	636.771
5.67095	626.885
5.67087	616.999
5.67078	607.113
5.67069	597.227
5.67061	587.341
5.67052	577.455
5.67043	567.569
5.68317	557.684
5.70949	634.299
5.72222	624.413
5.72214	614.528
5.72205	604.642
5.72196	594.756
5.72187	584.87
5.70896	574.984
5.70888	565.098
5.76069	624.413
5.7734	612.056
5.77332	602.17
5.77323	592.284
5.77314	582.398
5.77306	572.512
5.77297	562.626
5.77288	552.741
5.77279	542.855
5.77271	532.969
5.77264	525.554
5.82903	619.47
5.82465	607.113
5.82456	597.227
5.82448	587.341
5.82439	577.455
5.82431	568.805
5.81141	560.155
5.81133	550.269
5.81124	540.383
5.81115	530.497
5.86327	624.413
5.86318	614.528
5.8631	604.642
5.87583	594.756
5.87574	584.87
5.87566	574.984
5.87557	565.098
5.87548	555.212
5.8754	545.326
5.90524	536.264
5.93144	599.699
5.92706	587.341
5.92697	577.455
5.92688	567.569
5.9268	557.684
5.91391	550.269
5.97843	597.227
5.97835	587.341
5.97826	577.455
5.97817	567.569
5.97809	557.684
5.978	547.798
5.97791	537.912
5.97785	530.497
6.03385	579.927
6.02946	567.569
6.02938	557.684
6.02929	547.798
6.0292	537.912
6.01634	532.969
6.05544	604.642
6.05535	594.756
6.08518	584.87
6.0808	572.512
6.08071	562.626
6.08062	552.741
6.08054	542.855
6.08045	532.969
6.106	521.847
6.11933	579.927
6.13207	570.041
6.13198	560.155
6.13189	550.269
6.1318	540.383
6.13172	530.497
6.13154	510.725
6.13146	500.84
6.15728	520.611
6.15701	490.954
6.15693	481.068
6.15684	471.182
6.18763	570.041
6.18325	557.684
6.18316	547.798
6.18307	537.912
6.18299	528.026
6.17001	510.725
6.16992	500.84
6.22182	570.041
6.22174	560.155
6.22165	550.269
6.23439	540.383
6.2343	530.497
6.23421	520.611
6.23412	510.725
6.23404	500.84
6.23397	493.425
6.28986	530.497
6.28548	518.14
6.28539	508.254
6.31136	545.326
6.31093	495.897
6.31084	486.011
6.31078	478.596
6.3371	555.212
6.33692	535.44
6.33684	525.554
6.33675	515.668
6.33666	505.783
6.36266	545.326
6.34942	498.368
6.38839	555.212
6.38821	535.44
6.38813	525.554
6.38806	518.14
6.41822	545.326
6.43972	560.155
6.43946	530.497
6.43937	520.611
6.45246	550.269
6.46517	537.912
6.4692	510.725
6.46482	498.368
6.49498	525.554
6.49039	489.718
6.5205	510.725
6.51611	498.368
6.52023	481.068
6.51585	468.71
6.542	525.554
6.56753	513.197
6.56745	503.311
6.56736	493.425
6.55447	486.011
6.55441	478.596
6.62316	520.611
6.61878	508.254
6.61869	498.368
6.61861	488.482
6.61854	481.068
6.67018	520.611
6.67009	510.725
6.67001	500.84
6.66992	490.954
6.65703	483.539
6.696	540.383
6.69591	530.497
6.72147	520.611
6.72138	510.725
6.7213	500.84
6.72123	493.425
6.7472	530.497
6.77276	520.611
6.77267	510.725
6.77259	500.84
6.7725	490.954
6.77243	483.539
6.82409	525.554
6.82401	515.668
6.82392	505.783
6.82383	495.897
6.87538	525.554
6.8753	515.668
6.87521	505.783
6.87512	495.897
6.87504	486.011
6.87495	476.125
6.87487	467.475
6.90539	535.44
6.92661	518.14
6.92652	508.254
6.92644	498.368
6.92635	488.482
6.92626	478.596
6.95608	467.063
6.93891	458.824
6.98228	530.497
6.9779	518.14
6.97781	508.254
6.97774	499.604
6.96484	490.954
6.96475	481.068
7.03375	550.269
7.02937	537.912
7.02928	528.026
7.02919	518.14
7.02911	509.49
7.01624	503.311
7.06794	550.269
7.08066	537.912
7.08057	528.026
7.08048	518.14
7.08039	508.254
7.08031	498.368
7.08022	488.482
7.06733	481.068
7.13188	530.497
7.13179	520.611
7.13171	510.725
7.13162	500.84
7.11873	493.425
7.15759	537.912
7.18313	525.554
7.18305	516.904
7.17013	505.783
7.17006	498.368
7.20903	555.212
7.20895	545.326
7.20886	535.44
7.23442	525.554
7.23434	516.904
7.26024	545.326
7.26015	535.44
7.28998	525.554
7.29875	550.269
7.31148	540.383
7.31123	511.961
7.34132	531.321
7.32413	520.611
7.36288	552.741
7.3628	542.855
7.39261	530.497
7.38822	518.14
7.37536	513.197
7.41856	565.098
7.41417	552.741
7.41409	542.855
7.47007	589.813
7.46568	577.455
7.4656	567.569
7.46551	557.684
7.46542	547.798
7.46533	537.912
7.46525	528.026
7.46516	518.14
7.51726	609.585
7.51717	599.699
7.51708	589.813
7.51699	579.927
7.51691	570.041
7.51682	560.155
7.51673	550.269
7.51665	540.383
7.51657	531.733
7.50365	520.611
7.54305	626.885
7.54297	616.999
7.57278	604.642
7.56839	592.284
7.56831	582.398
7.56822	572.512
7.56813	562.626
7.55524	555.212
7.59428	619.47
7.61984	609.585
7.61975	599.699
7.61966	589.813
7.61958	579.927
7.61951	572.512
7.64984	619.47
7.67536	604.642
7.67099	593.52
7.65809	584.87
7.658	574.984
7.69686	619.47
7.72277	649.128
7.72268	639.242
7.72259	629.356
7.72242	609.585
7.72233	599.699
7.72224	589.813
7.74848	656.543
7.75243	619.47
7.77401	644.185
7.77393	634.299
7.77367	604.642
7.7736	597.227
7.8042	673.843
7.79981	661.486
7.79972	651.6
7.80376	624.413
7.79938	612.056
7.83015	708.444
7.82576	696.086
7.82568	686.2
7.81244	639.242
7.85601	733.158
7.85163	720.801
7.85549	673.843
7.87716	708.444
7.87707	698.558
7.87699	688.672
7.87675	661.486
7.90333	767.759
7.90324	757.873
7.90316	747.987
7.90307	738.101
7.90298	728.215
7.90289	718.33
7.88972	678.786
7.88964	668.9
7.92846	709.679
7.95471	777.645
7.95462	767.759
7.95453	757.873
7.95445	747.987
7.95436	738.101
7.95427	728.215
7.95418	718.33
7.97976	710.915
8.006	777.645
8.00591	767.759
8.00582	757.873
8.00574	747.987
8.00565	738.101
8.00556	728.215
7.99265	718.33
8.05725	772.702
8.05716	762.816
8.05707	752.93
8.05701	745.516
8.08333	822.132
8.08324	812.246
8.08315	802.36
8.08307	792.474
8.08298	782.588
8.10915	841.903
8.10906	832.018
8.09574	775.174
8.13915	851.789
8.13889	822.132
8.13451	809.774
8.13442	799.888
8.13433	790.002
8.12147	785.059
8.16039	836.96
8.18639	876.504
8.1863	866.618
8.18621	856.732
8.18613	846.846
8.18596	828.31
8.17304	817.189
8.17298	809.774
8.21238	916.048
8.21229	906.162
8.21221	896.276
8.21212	886.39
8.19886	836.96
8.26825	950.648
8.26387	938.291
8.26378	928.405
8.26369	918.519
8.26361	908.633
8.25072	901.219
8.25063	891.333
8.25057	883.919
8.29403	965.477
8.32033	1039.62
8.31594	1027.26
8.31586	1017.38
8.31577	1007.49
8.31568	997.607
8.31559	987.721
8.31551	977.835
8.31955	951.472
8.30238	943.234
8.32822	965.477
8.36782	1093.99
8.36774	1084.11
8.36765	1074.22
8.36756	1064.34
8.36747	1054.45
8.36739	1044.56
8.3673	1034.68
8.36721	1024.79
8.36714	1016.14
8.35422	1005.02
8.39364	1113.77
8.39356	1103.88
8.41955	1143.42
8.41946	1133.54
8.41938	1123.65
8.41911	1093.99
8.41903	1084.11
8.44982	1182.97
8.44543	1170.61
8.44535	1160.72
8.44526	1150.84
8.44921	1113.77
8.44482	1101.41
8.47612	1257.11
8.47173	1244.75
8.47165	1234.87
8.47156	1224.98
8.47147	1215.1
8.47139	1205.21
8.4713	1195.32
8.45797	1138.48
8.45789	1128.59
8.45754	1089.05
8.49771	1281.83
8.49762	1271.94
8.52815	1341.14
8.52377	1328.78
8.52368	1318.9
8.52359	1309.01
8.5235	1299.13
8.52342	1289.24
8.5232	1264.53
8.51027	1252.17
8.5102	1244.75
8.55419	1385.63
8.5498	1373.27
8.54972	1363.39
8.54963	1353.5
8.53613	1276.88
8.5763	1469.66
8.57621	1459.77
8.57612	1449.89
8.57604	1440
8.57595	1430.12
8.57586	1420.23
8.57578	1410.34
8.57569	1400.46
8.56234	1341.14
8.60718	1578.4
8.60279	1566.05
8.60271	1556.16
8.60262	1546.27
8.60253	1536.39
8.60245	1526.5
8.60236	1516.62
8.60227	1506.73
8.60218	1496.84
8.6021	1486.96
8.60201	1477.07
8.58842	1390.57
8.58834	1380.69
8.58825	1370.8
8.58816	1360.91
8.58808	1351.03
8.62868	1593.23
8.61472	1464.72
8.61466	1457.3
8.65607	1790.95
8.65598	1781.06
8.6559	1771.18
8.65581	1761.29
8.65572	1751.41
8.65563	1741.52
8.65555	1731.64
8.65546	1721.75
8.65537	1711.86
8.65528	1701.98
8.6552	1692.09
8.65511	1682.21
8.65502	1672.32
8.65494	1662.43
8.65485	1652.55
8.65476	1642.66
8.65467	1632.78
8.65459	1622.89
8.6545	1613
8.65441	1603.12
8.64142	1583.35
8.64133	1573.46
8.64126	1566.05
8.68721	1929.35
8.68283	1917
8.68274	1907.11
8.68265	1897.22
8.68257	1887.34
8.68248	1877.45
8.68239	1867.57
8.6823	1857.68
8.68222	1847.79
8.68213	1837.91
8.68204	1828.02
8.68195	1818.14
8.68187	1808.25
8.68179	1799.6
8.71482	2151.79
8.71044	2139.43
8.71035	2129.54
8.71026	2119.66
8.71017	2109.77
8.71009	2099.89
8.71	2090
8.70991	2080.11
8.70982	2070.23
8.70974	2060.34
8.70965	2050.46
8.70956	2040.57
8.70948	2030.68
8.70939	2020.8
8.7093	2010.91
8.70921	2001.03
8.70913	1991.14
8.70904	1981.25
8.70895	1971.37
8.70886	1961.48
8.70878	1951.6
8.70869	1941.71
8.74208	2334.68
8.73769	2322.32
8.73761	2312.43
8.73752	2302.55
8.73743	2292.66
8.73735	2282.77
8.73726	2272.89
8.73717	2263
8.73708	2253.12
8.737	2243.23
8.73691	2233.35
8.73682	2223.46
8.73673	2213.57
8.73665	2203.69
8.73656	2193.8
8.73647	2183.92
8.73639	2174.03
8.7363	2164.14
8.7214	1929.35
8.72132	1919.47
8.72123	1909.58
8.72114	1899.7
8.72108	1892.28
8.76916	2497.79
8.76478	2485.44
8.76469	2475.55
8.7646	2465.66
8.76452	2455.78
8.76443	2445.89
8.76434	2436.01
8.76426	2426.12
8.76417	2416.23
8.76408	2406.35
8.76399	2396.46
8.76391	2386.58
8.76382	2376.69
8.76373	2366.81
8.76364	2356.92
8.76356	2347.03
8.79276	2749.88
8.79267	2740
8.79258	2730.11
8.7925	2720.23
8.79241	2710.34
8.79232	2700.45
8.79223	2690.57
8.79215	2680.68
8.79206	2670.8
8.79197	2660.91
8.79188	2651.02
8.7918	2641.14
8.79171	2631.25
8.79162	2621.37
8.79154	2611.48
8.79145	2601.6
8.79136	2591.71
8.79127	2581.82
8.79119	2571.94
8.7911	2562.05
8.79101	2552.17
8.79093	2542.28
8.79084	2532.39
8.79075	2522.51
8.79066	2512.62
8.8205	2987.15
8.82041	2977.26
8.82032	2967.37
8.82023	2957.49
8.82015	2947.6
8.82006	2937.72
8.81997	2927.83
8.81989	2917.94
8.8198	2908.06
8.81971	2898.17
8.81962	2888.29
8.81954	2878.4
8.81945	2868.51
8.81936	2858.63
8.81927	2848.74
8.81919	2838.86
8.8191	2828.97
8.81901	2819.09
8.81893	2809.2
8.81884	2799.31
8.81875	2789.43
8.81866	2779.54
8.81858	2769.66
8.81849	2759.77
8.80342	2505.21
8.84699	3083.53
8.8469	3073.65
8.84682	3063.76
8.84673	3053.88
8.84664	3043.99
8.84656	3034.1
8.84647	3024.22
8.84638	3014.33
8.84629	3004.45
8.84621	2994.56
8.85892	2982.2
8.85883	2972.32
8.85875	2962.43
8.85866	2952.55
8.85857	2942.66
8.87131	2932.77
8.87122	2922.89
8.87113	2913
8.87104	2903.12
8.87096	2893.23
8.87087	2883.34
8.87078	2873.46
8.8707	2863.57
8.87061	2853.69
8.87052	2843.8
8.87043	2833.91
8.89599	2824.03
8.8959	2814.14
8.89582	2804.26
8.89573	2794.37
8.89564	2784.48
8.89556	2774.6
8.89547	2764.71
8.89538	2754.83
8.89529	2744.94
8.89521	2735.06
8.89512	2725.17
8.89503	2715.28
8.89495	2705.4
8.89486	2695.51
8.89477	2685.63
8.89468	2675.74
8.8946	2665.85
8.89451	2655.97
8.89442	2646.08
8.89433	2636.2
8.89425	2626.31
8.89416	2616.42
8.89407	2606.54
8.89399	2596.65
8.8939	2586.77
8.89382	2578.12
8.92364	2566.99
8.91926	2554.64
8.91917	2544.75
8.91909	2534.87
8.919	2524.98
8.91891	2515.09
8.91882	2505.21
8.91874	2495.32
8.91865	2485.44
8.91856	2475.55
8.91848	2465.66
8.91839	2455.78
8.9183	2445.89
8.91821	2436.01
8.91813	2426.12
8.91804	2416.23
8.91795	2406.35
8.91786	2396.46
8.91778	2386.58
8.91769	2376.69
8.9176	2366.81
8.91752	2356.92
8.91743	2347.03
8.91734	2337.15
8.91725	2327.26
8.91717	2317.38
8.91708	2307.49
8.91699	2297.6
8.90413	2292.66
8.94253	2285.25
8.94244	2275.36
8.94235	2265.47
8.94227	2255.59
8.94218	2245.7
8.94209	2235.82
8.94201	2225.93
8.94192	2216.04
8.94183	2206.16
8.94175	2197.51
8.97158	2186.39
8.96719	2174.03
8.96711	2164.14
8.96702	2154.26
8.96693	2144.37
8.96684	2134.49
8.96676	2124.6
8.96667	2114.71
8.96658	2104.83
8.95372	2099.89
8.99212	2092.47
8.99203	2082.59
8.99194	2072.7
8.99186	2062.81
9.00555	2161.67
9.00546	2151.79
9.00538	2141.9
9.00529	2132.01
9.0052	2122.13
9.00512	2112.24
9.01783	2099.89
9.02169	2052.93
9.01731	2040.57
9.01722	2030.68
9.01713	2020.8
9.01704	2010.91
9.01696	2001.03
9.00409	1996.08
9.04764	2087.53
9.04326	2075.17
9.04317	2065.28
9.04677	1988.67
9.04238	1976.31
9.0423	1966.43
9.04221	1956.54
9.05632	2102.36
9.05588	2052.93
9.05579	2043.04
9.05571	2033.16
9.05562	2023.27
9.06836	2013.38
9.06827	2003.5
9.06775	1944.18
9.06766	1934.3
9.06758	1925.65
9.0981	1993.61
9.09372	1981.25
9.09363	1971.37
9.09354	1961.48
9.09346	1951.6
9.0974	1914.52
9.09302	1902.17
9.09293	1892.28
9.08007	1887.34
9.11899	1939.24
9.1189	1929.35
9.11847	1879.92
9.11839	1871.27
9.14514	1996.08
9.14505	1986.2
9.14496	1976.31
9.14488	1966.43
9.14479	1956.54
9.1447	1946.65
9.14874	1919.47
9.14435	1907.11
9.14427	1897.22
9.14418	1887.34
9.17024	1934.3
9.16972	1874.98
9.16963	1865.1
9.16954	1855.21
9.16945	1845.32
9.16937	1835.44
9.18341	1973.84
9.18332	1963.95
9.18324	1954.07
9.18315	1944.18
9.18297	1924.41
9.18289	1914.52
9.1828	1904.64
9.19551	1892.28
9.19543	1882.4
9.19496	1829.26
9.22524	1870.04
9.22085	1857.68
9.22077	1847.79
9.22068	1837.91
9.2248	1820.61
9.22042	1808.25
9.22033	1798.37
9.22024	1788.48
9.22016	1778.59
9.2468	1892.28
9.24672	1882.4
9.24997	1766.24
9.25943	1870.04
9.25934	1860.15
9.25926	1850.27
9.25917	1840.38
9.25908	1830.49
9.25899	1820.61
9.25891	1810.72
9.25882	1800.84
9.25873	1790.95
9.27147	1781.06
9.27121	1751.41
9.27112	1741.52
9.27104	1732.87
9.2842	1771.18
9.28412	1761.29
9.30086	1721.75
9.29648	1709.39
9.29639	1699.51
9.29631	1689.62
9.29622	1679.73
9.29613	1669.85
9.29604	1659.96
9.29596	1650.08
9.29587	1640.19
9.29578	1630.3
9.2957	1620.42
9.29561	1610.53
9.29552	1600.65
9.29543	1590.76
9.29535	1580.88
9.29526	1570.99
9.28239	1566.05
9.32507	1558.63
9.32069	1546.27
9.3206	1536.39
9.32051	1526.5
9.30765	1521.56
9.3341	1613
9.33401	1603.12
9.33392	1593.23
9.33384	1583.35
9.33375	1573.46
9.35032	1514.15
9.34594	1501.79
9.34585	1491.9
9.34576	1482.02
9.34568	1472.13
9.37549	1459.77
9.3711	1447.42
9.37102	1437.53
9.37093	1427.64
9.37084	1417.76
9.37076	1407.87
9.37067	1397.99
9.37058	1388.1
9.37049	1378.21
9.37041	1368.33
9.37032	1358.44
9.37023	1348.56
9.37015	1338.67
9.37006	1328.78
9.36997	1318.9
9.36988	1309.01
9.3698	1299.13
9.36971	1289.24
9.36962	1279.35
9.35676	1274.41
9.39516	1267
9.39507	1257.11
9.39498	1247.23
9.3949	1237.34
9.39481	1227.45
9.39472	1217.57
9.39463	1207.68
9.39455	1197.8
9.39446	1187.91
9.39437	1178.02
9.3943	1169.37
9.40807	1276.88
9.42412	1158.25
9.41973	1145.9
9.41965	1136.01
9.41956	1126.12
9.41947	1116.24
9.41939	1106.35
9.4193	1096.47
9.44911	1084.11
9.44473	1071.75
9.44464	1061.86
9.44455	1051.98
9.44446	1042.09
9.44438	1032.21
9.44429	1022.32
9.4442	1012.44
9.44411	1002.55
9.44403	992.664
9.44394	982.778
9.44385	972.892
9.44377	963.006
9.44368	953.12
9.44359	943.234
9.4435	933.348
9.44342	923.462
9.44333	913.576
9.44324	903.69
9.44316	893.804
9.49475	928.405
9.49466	918.519
9.49458	908.633
9.49449	898.747
9.4944	888.862
9.49432	878.976
9.49423	869.09
9.49414	859.204
9.49405	849.318
9.49397	839.432
9.49388	829.546
9.49379	819.66
9.4937	809.774
9.49362	799.888
9.49353	790.002
9.49344	780.117
9.48058	775.174
9.51898	767.759
9.51889	757.873
9.5188	747.987
9.51872	738.101
9.51863	728.215
9.51854	718.33
9.51846	708.444
9.51838	699.793
9.53232	827.075
9.53224	817.189
9.53215	807.303
9.53206	797.417
9.53198	787.531
9.53189	777.645
9.54393	688.672
9.54384	678.786
9.54375	668.9
9.54366	659.014
9.54358	649.128
9.54349	639.242
9.55736	757.873
9.55727	747.987
9.55719	738.101
9.5571	728.215
9.55701	718.33
9.55692	708.444
9.55684	698.558
9.57332	629.356
9.56894	616.999
9.56885	607.113
9.56876	597.227
9.5559	592.284
9.58218	663.957
9.58209	654.071
9.582	644.185
9.5943	584.87
9.59421	574.984
9.59413	565.098
9.59404	555.212
9.59395	545.326
9.59386	535.44
9.59378	525.554
9.5937	516.904
9.60747	624.413
9.60739	614.528
9.6073	604.642
9.60721	594.756
9.63264	570.041
9.63255	560.155
9.63246	550.269
9.63238	540.383
9.64511	530.497
9.64502	520.611
9.64494	510.725
9.64485	500.84
9.64476	490.954
9.67032	481.068
9.67023	471.182
9.67016	462.532
9.68323	490.954
9.69998	451.41
9.6956	439.053
9.69551	429.167
9.69542	419.281
9.69534	410.631
9.73417	451.41
9.74691	441.524
9.74682	431.638
9.74673	421.752
9.74665	411.866
9.74656	401.98
9.77639	392.095
9.75923	384.68
9.78533	436.581
9.78524	426.695
9.79798	416.809
9.79789	406.923
9.79763	377.266
9.79755	368.616
9.81063	397.038
9.82336	387.152
9.8231	357.494
9.84892	377.266
9.84883	367.38
9.87439	357.494
9.8743	347.608
9.87422	337.722
9.8873	367.38
9.89978	327.836
9.91277	347.608
9.92551	337.722
9.92533	317.95
9.92526	309.3
9.95107	327.836
9.9508	298.178
9.95074	290.764
9.98107	337.722
9.9809	317.95
9.97651	305.593
10.0063	293.235
10.0279	317.95
10.0278	308.064
10.0577	298.178
10.0533	285.821
10.0663	313.007
10.0831	273.464
10.0659	266.049
10.1089	298.178
10.1046	285.821
10.1301	277.171
10.1602	298.178
10.1559	285.821
10.16	268.521
10.1819	332.779
10.1818	322.893
10.1817	313.007
10.1812	254.928
10.2073	300.65
10.2072	290.764
10.2071	280.878
10.207	270.992
10.2069	261.106
10.2197	251.22
10.2457	298.178
10.2584	285.821
10.2584	275.935
10.2583	266.049
10.2582	257.399
10.3096	273.464
10.3095	263.578
10.3351	253.692
10.335	243.806
10.3349	236.391
10.3611	293.235
10.361	283.35
10.3609	273.464
10.3608	263.578
10.3864	253.692
10.3863	243.806
10.3862	233.92
10.4167	303.121
10.4124	290.764
10.4123	280.878
10.4122	270.992
10.4121	261.106
10.4419	248.749
10.4508	293.235
10.4508	283.35
10.4635	270.992
10.4634	261.106
10.4674	233.92
10.463	221.563
10.4629	211.677
10.4629	203.027
10.4932	248.749
10.5147	261.106
10.5187	233.92
10.5143	221.563
10.5143	214.148
10.5402	248.749
10.566	266.049
10.5659	256.163
10.57	238.863
10.5657	226.506
10.5656	216.62
10.5527	211.677
10.6173	263.578
10.6172	253.692
10.6171	243.806
10.617	233.92
10.6041	224.034
10.604	214.148
10.643	270.992
10.6685	258.635
10.6684	248.749
10.6684	240.099
10.6554	228.977
10.7198	256.163
10.7197	246.277
10.7196	236.391
10.7067	231.449
10.7494	224.034
10.745	211.677
10.7322	206.734
10.7753	248.749
10.7709	236.391
10.7706	201.791
10.7968	263.578
10.7965	225.27
10.7835	214.148
10.8223	253.692
10.8223	243.806
10.8222	233.92
10.8524	263.578
10.852	224.858
10.8348	216.62
10.8736	248.749
10.8735	240.099
10.8994	268.521
10.8993	258.635
10.9292	248.749
10.912	241.334
10.9507	270.992
10.9506	261.106
10.9547	233.92
10.9503	224.034
10.9805	248.749
11.006	234.744
10.9888	226.506
11.0318	258.635
11.0274	246.277
11.0573	233.92
11.0401	226.506
11.0788	258.635
11.0788	248.749
11.1043	238.863
11.1343	248.749
11.1341	228.977
11.117	221.563
11.1814	253.692
11.1813	243.806
11.1812	233.92
11.1683	226.506
11.2327	261.106
11.2327	251.22
11.2326	241.334
11.2325	231.449
11.2324	221.563
11.2323	212.912
11.2839	248.749
11.2838	238.863
11.2837	228.977
11.2837	219.091
11.2708	211.677
11.3097	258.635
11.3352	248.749
11.3351	238.863
11.335	228.977
11.335	221.563
11.3481	258.635
11.3864	241.334
11.3863	231.449
11.3863	221.563
11.4118	210.441
11.4378	246.277
11.4377	236.391
11.4376	226.506
11.4375	216.62
11.4673	205.91
11.4933	238.863
11.4889	226.506
11.4888	216.62
11.5143	204.262
11.5274	233.92
11.5401	221.563
11.54	211.677
11.5399	198.084
11.5915	228.977
11.5914	219.091
11.5913	209.205
11.5912	199.319
11.5783	191.905
11.6428	226.506
11.6427	216.62
11.6426	206.734
11.6425	196.848
11.6296	189.433
11.694	219.091
11.6939	209.205
11.6938	201.791
11.7197	228.977
11.7453	219.091
11.7452	209.205
11.7323	201.791
11.771	226.506
11.7965	214.148
11.7836	206.734
11.8265	224.034
11.8478	209.205
11.8477	199.319
11.8476	189.433
11.8608	228.977
11.8735	219.091
11.8732	180.783
11.8991	209.205
11.899	199.319
11.8861	189.433
11.9248	216.62
11.9503	204.262
11.9502	195.612
11.9762	231.449
11.9761	221.563
11.976	211.677
11.9758	188.198
12.0015	199.319
12.0275	228.977
12.0274	219.091
12.0273	209.205
12.0529	203.027
12.0789	241.334
12.0788	231.449
12.0787	221.563
12.0786	211.677
12.1042	201.791
12.1341	209.205
12.1556	224.034
12.1554	194.376
12.1812	214.148
12.1811	204.262
12.2069	224.034
12.2067	194.376
12.2368	214.148
12.2324	201.791
12.2323	188.198
12.2625	228.977
12.2838	214.148
12.2837	204.262
12.2836	194.376
12.3095	224.034
12.3092	185.726
12.3351	214.148
12.335	204.262
12.3349	194.376
12.348	224.034
12.3906	214.148
12.3862	201.791
12.3862	191.905
12.4164	228.977
12.4376	214.148
12.4506	233.92
12.4634	224.034
12.4632	205.498
12.4932	214.148
12.4888	198.084
12.5403	226.506
12.5403	216.62
12.5402	206.734
12.5273	201.791
12.5657	194.376
12.5788	224.034
12.5915	211.677
12.5914	203.027
12.6428	214.148
12.6427	204.262
12.6984	214.148
12.694	201.791
12.6939	191.905
12.6938	184.49
12.7454	219.091
12.7453	209.205
12.7453	199.319
12.7452	189.433
12.7967	219.091
12.7966	209.205
12.7966	199.319
12.7965	189.433
12.7964	180.783
12.8522	209.205
12.8478	196.848
12.8477	186.962
12.8477	178.312
12.8782	243.806
12.8738	231.449
12.8737	221.563
12.9035	209.205
12.8863	201.791
12.9123	243.806
12.9123	233.92
12.925	221.563
12.9548	209.205
12.9504	196.848
12.9375	191.905
13.0018	214.148
13.0018	204.262
13.0017	194.376
13.0016	185.726
13.0532	224.034
13.0531	214.148
13.053	204.262
13.053	194.376
13.0529	184.49
13.0528	175.84
13.1046	233.92
13.1045	224.034
13.1044	214.148
13.1043	205.498
13.0914	194.376
13.0913	184.49
13.1558	224.034
13.1557	214.148
13.1556	205.498
13.1812	194.376
13.207	214.148
13.2069	204.262
13.1939	186.962
13.237	224.034
13.2197	194.376
13.2583	209.205
13.2582	201.791
13.2841	228.977
13.284	219.091
13.3096	210.441
13.3354	238.863
13.3354	228.977
13.3353	220.327
13.3613	258.635
13.3612	248.749
13.3867	236.391
13.3866	226.506
13.3865	216.62
13.3865	209.205
13.438	238.863
13.4379	228.977
13.4379	219.091
13.4378	209.205
13.4377	201.791
13.4893	238.863
13.4892	228.977
13.4891	219.091
13.4891	209.205
13.5189	200.143
13.5409	273.464
13.5408	263.578
13.5407	253.692
13.5407	243.806
13.5406	233.92
13.5405	224.034
13.5404	215.384
13.5709	283.35
13.5964	268.521
13.5921	256.163
13.5792	251.22
13.6176	243.806
13.6476	253.692
13.6474	233.92
13.6303	226.506
13.6729	219.091
13.6686	206.734
13.6818	253.692
13.6945	243.806
13.6944	233.92
13.72	224.034
13.7199	215.384
13.707	204.262
13.75	233.92
13.7713	222.798
13.7843	243.806
13.797	231.449
13.8011	214.148
13.8224	200.555
13.8482	226.506
13.8482	216.62
13.8481	206.734
13.8736	199.319
13.8997	248.749
13.8996	238.863
13.8996	228.977
13.8995	220.327
13.8866	209.205
13.9509	236.391
13.9508	226.506
13.9507	216.62
14.0022	241.334
14.0022	231.449
14.0021	221.563
14.002	211.677
14.0019	204.262
14.0538	268.521
14.0537	258.635
14.0536	248.749
14.0535	238.863
14.0534	228.977
14.0533	219.091
14.0404	209.205
14.1048	243.806
14.1048	233.92
14.1047	224.034
14.1046	215.384
14.1603	233.92
14.1559	221.563
14.1818	248.749
14.2118	258.635
14.2117	238.863
14.2073	226.506
14.2072	216.62
14.2071	209.205
14.2459	248.749
14.2587	236.391
14.2586	226.506
14.2585	216.62
14.2584	206.734
14.3099	233.92
14.3098	224.034
14.3097	214.148
14.3097	205.498
14.3399	243.806
14.3395	195.2
14.3654	228.977
14.3611	216.62
14.361	206.734
14.4127	253.692
14.4126	243.806
14.4125	233.92
14.4124	224.034
14.4123	214.148
14.4122	204.262
14.4639	241.334
14.4638	231.449
14.4637	221.563
14.4636	211.677
14.4635	201.791
14.4891	190.669
14.5151	238.863
14.515	228.977
14.515	219.091
14.5149	209.205
14.5148	199.319
14.5707	238.863
14.5663	226.506
14.5662	216.62
14.5661	206.734
14.5533	201.791
14.622	243.806
14.6176	231.449
14.6176	221.563
14.6175	211.677
14.6046	204.262
14.6691	246.277
14.669	236.391
14.6689	226.506
14.6688	217.855
14.7202	228.977
14.7201	219.091
14.72	210.441
14.7502	238.863
14.7499	200.143
14.7327	191.905
14.7714	224.034
14.7714	214.148
14.8017	263.578
14.7973	251.22
14.7972	241.334
14.7972	231.449
14.8227	221.563
14.8098	211.677
14.853	263.578
14.8486	251.22
14.8485	241.334
14.8485	231.449
14.874	221.563
14.8872	268.521
14.9	258.635
14.8999	248.749
14.8998	238.863
14.8997	228.977
14.9253	222.798
14.9385	263.578
14.9384	253.692
14.9383	243.806
14.9511	233.92
14.9509	214.148
14.9508	206.734
14.9766	226.506
15.0068	258.635
15.0025	246.277
15.0024	236.391
15.0279	224.034
15.0538	253.692
15.0537	243.806
15.0536	233.92
15.0792	227.741
15.1051	258.635
15.1051	248.749
15.105	238.863
15.1351	268.521
15.1306	232.684
15.1607	253.692
15.1563	241.334
15.1604	224.858
15.2077	258.635
15.2076	248.749
15.2075	238.863
15.2075	230.213
15.1946	221.563
15.2379	288.293
15.2335	275.935
15.2334	266.049
15.2632	253.692
15.2589	241.334
15.2721	288.293
15.272	278.407
15.2847	266.049
15.3145	253.692
15.3102	241.334
15.3362	285.821
15.3361	275.935
15.336	266.049
15.3615	251.22
15.3614	241.334
15.3614	231.449
15.3613	221.563
15.3612	214.148
15.4171	248.749
15.4127	236.391
15.4126	227.741
15.3997	221.563
15.4645	293.235
15.4644	283.35
15.4643	273.464
15.4642	263.578
15.4641	253.692
15.4512	243.806
15.4511	233.92
15.451	224.034
15.5199	273.464
15.5155	261.106
15.5154	251.22
15.5153	241.334
[truncated: 4,966 more rows]
